# Supplementary material for: Targeted surveillance strategies for efficient detection of novel antibiotic resistance variants
Source: eLife. 2020 Jun 30;9:e56367. doi: 10.7554/eLife.56367 (PMC7326491; doi:10.7554/eLife.56367)
Supplement: Supplementary file 1. — M, men; W, women; MSM, men who have sex with men; MSW, men who have sex with women; WSM, women who have sex with men; CFX-R, cefixime resistance; CRO-RS, ceftriaxone reduced susceptibility; AZM-R, azithromycin resistance. [file elife-56367-supp1.xlsx]

## Sheet: Sheet1
Supplementary file 1. Metadata and resistance variant profiles for isolates assessed in this study. M, men; W, women; MSM, men who have sex with men; MSW, men who have sex with women; WSM, women who have sex with men; CFX-R, cefixime resistance; CRO-RS, ceftriaxone reduced susceptibility; AZM-R, azithromycin resistance
SRA_run_ID	Dataset	Gender	Sexual_behavior	Anatomical_site_of_isolation	Country	State/Prefecture	Sex_overseas	Sex_work	RplD_G70D	23S_C2611T (2-4 alleles)	penA_XXXIV	16S rRNA C1209A (4 alleles)	porA (N. meningitidis-like)	cppB deletion	DR-9A G168A	GyrA_S91F	PorB_G120/A121_mutation	CRO-RS (≥0.12 𝛍g/mL)	CFX-R (>0.25 𝛍g/mL)	AZM-R (>1 𝛍g/mL)
ERR1204772	1	M	MSM	Urethra	United States	New York	NA	NA	0	0	0	0	0	0	0	0	1	0	0	1
ERR1204773	1	M	MSW/WSM	Urethra	United States	New York	NA	NA	0	0	0	0	0	0	0	1	0	0	0	0
ERR1204774	1	M	MSW/WSM	Urethra	United States	New York	NA	NA	0	0	0	0	0	0	0	0	1	0	0	0
ERR1204775	1	M	MSW/WSM	Urethra	United States	New York	NA	NA	0	0	0	0	0	0	0	0	1	0	0	0
ERR1204776	1	M	MSW/WSM	Urethra	United States	New York	NA	NA	0	0	0	0	0	0	0	0	0	0	0	0
ERR1204777	1	M	MSM	Urethra	United States	New York	NA	NA	0	0	0	0	0	0	0	1	1	0	0	0
ERR1204778	1	M	MSM	Urethra	United States	New York	NA	NA	0	0	0	0	0	0	0	0	0	0	0	0
ERR1204779	1	M	MSW/WSM	Urethra	United States	New York	NA	NA	0	0	0	0	0	0	0	0	0	0	0	0
ERR1204780	1	M	MSW/WSM	Urethra	United States	New York	NA	NA	0	0	0	0	0	0	0	0	1	0	0	0
ERR1204781	1	M	MSW/WSM	Urethra	United States	New York	NA	NA	0	0	0	0	0	0	0	0	1	0	0	0
ERR1204782	1	M	MSW/WSM	Urethra	United States	New York	NA	NA	0	0	0	0	0	0	0	1	1	0	0	0
ERR1204783	1	M	MSM	Urethra	United States	New York	NA	NA	0	0	0	0	0	0	0	0	0	0	0	0
ERR1204784	1	M	MSM	Urethra	United States	New York	NA	NA	0	0	0	0	0	0	0	1	1	0	0	0
ERR1204785	1	M	MSW/WSM	Urethra	United States	New York	NA	NA	1	0	0	0	0	0	0	0	0	0	0	0
ERR1204786	1	M	MSW/WSM	Urethra	United States	New York	NA	NA	0	0	0	0	0	0	0	0	0	0	0	0
ERR1204787	1	M	MSW/WSM	Urethra	United States	New York	NA	NA	0	0	0	0	0	0	0	0	0	0	0	0
ERR1204788	1	M	NA	Urethra	United States	New York	NA	NA	0	0	0	0	0	0	0	0	0	0	0	0
ERR1204789	1	M	MSM	Urethra	United States	New York	NA	NA	0	0	0	0	0	0	0	0	1	0	0	0
ERR1204790	1	M	MSM	Urethra	United States	New York	NA	NA	0	0	0	0	0	0	0	0	1	0	0	0
ERR1204791	1	M	NA	Urethra	United States	New York	NA	NA	0	0	0	0	0	0	0	0	1	0	0	0
ERR1204792	1	M	MSM	Urethra	United States	New York	NA	NA	0	0	0	0	0	0	0	0	0	0	0	0
ERR1204793	1	M	MSW/WSM	Urethra	United States	New York	NA	NA	0	0	0	0	0	0	0	0	1	0	0	0
ERR1204794	1	M	MSW/WSM	Urethra	United States	New York	NA	NA	0	0	0	0	0	0	0	0	1	0	0	0
ERR1204795	1	M	MSW/WSM	Urethra	United States	New York	NA	NA	0	0	0	0	0	0	0	0	0	0	0	0
ERR1204796	1	M	MSW/WSM	Urethra	United States	New York	NA	NA	0	0	0	0	0	0	0	0	0	0	0	0
ERR1204797	1	M	MSW/WSM	Urethra	United States	New York	NA	NA	0	0	0	0	0	0	0	0	1	0	0	0
ERR1204798	1	M	MSW/WSM	Urethra	United States	New York	NA	NA	0	0	0	0	0	0	0	0	1	0	0	0
ERR1204801	1	M	MSW/WSM	Urethra	United States	New York	NA	NA	0	0	0	0	0	1	0	0	1	0	0	0
ERR1204802	1	M	MSM	Urethra	United States	New York	NA	NA	1	0	0	0	0	0	0	0	1	0	0	0
ERR1204803	1	M	MSW/WSM	Urethra	United States	New York	NA	NA	0	0	0	0	0	0	0	1	1	0	0	0
ERR1204804	1	M	MSW/WSM	Urethra	United States	New York	NA	NA	0	0	0	0	0	0	0	1	1	0	0	0
ERR1204805	1	M	MSM	Rectum	United States	New York	NA	NA	0	0	0	0	0	0	0	0	0	0	0	0
ERR1204806	1	M	MSM	Urethra	United States	New York	NA	NA	0	0	0	0	0	0	0	1	1	0	0	0
ERR1204807	1	M	MSM	Urethra	United States	New York	NA	NA	1	0	0	0	0	0	0	0	0	0	0	0
ERR1204812	1	M	NA	Urethra	United States	New York	NA	NA	0	0	0	0	0	0	0	1	0	0	0	0
ERR1204813	1	M	MSM	Rectum	United States	New York	NA	NA	0	0	0	0	0	0	0	0	0	0	0	0
ERR1837102	1	M	MSM	Urethra	United States	New York	NA	NA	0	0	0	0	0	0	0	0	0	0	0	0
ERR1837103	1	M	MSM	Urethra	United States	New York	NA	NA	1	0	0	0	0	0	0	0	0	0	0	0
ERR1837104	1	M	MSM	Urethra	United States	New York	NA	NA	1	0	0	0	0	0	0	0	0	0	0	0
ERR1837105	1	M	MSM	Urethra	United States	New York	NA	NA	0	0	1	0	0	0	0	1	1	0	0	0
ERR1837106	1	M	MSW/WSM	Urethra	United States	New York	NA	NA	0	0	0	0	0	0	0	0	0	0	0	0
ERR1837107	1	NA	NA	NA	United States	New York	NA	NA	0	0	0	0	0	1	0	0	1	0	0	NA
ERR1837109	1	M	MSM	Urethra	United States	New York	NA	NA	0	0	0	0	0	0	0	0	1	0	0	0
ERR1837110	1	M	MSM	Urethra	United States	New York	NA	NA	0	0	0	0	0	0	0	0	1	0	0	0
ERR1837111	1	M	MSM	Rectum	United States	New York	NA	NA	0	0	0	0	0	0	0	1	0	0	0	0
ERR1837112	1	W	MSW/WSM	Cervix	United States	New York	NA	NA	0	0	0	0	0	0	0	0	0	0	0	0
ERR1837113	1	W	MSW/WSM	Cervix	United States	New York	NA	NA	0	0	0	0	0	1	0	0	0	0	0	0
ERR1837114	1	M	MSW/WSM	Urethra	United States	New York	NA	NA	0	0	0	0	0	1	0	0	1	0	0	0
ERR1837115	1	M	MSM	Urethra	United States	New York	NA	NA	0	0	0	0	0	0	0	0	0	0	0	0
ERR1837116	1	M	MSM	Urethra	United States	New York	NA	NA	0	0	0	0	0	0	0	0	1	0	0	0
ERR1837117	1	M	MSM	Urethra	United States	New York	NA	NA	0	0	0	0	0	0	0	1	0	0	0	0
ERR1837118	1	M	NA	Urethra	United States	New York	NA	NA	0	0	0	0	0	0	0	0	0	0	0	0
ERR1837119	1	M	MSM	Rectum	United States	New York	NA	NA	1	0	0	0	0	0	0	0	0	0	0	0
ERR1837120	1	M	MSM	Rectum	United States	New York	NA	NA	0	0	0	0	0	0	0	0	1	0	0	0
ERR1837121	1	M	MSM	Urethra	United States	New York	NA	NA	0	0	1	0	0	0	0	1	1	0	0	0
ERR1837122	1	M	MSM	Urethra	United States	New York	NA	NA	0	0	0	0	0	0	0	0	0	0	0	0
ERR1837123	1	M	MSM	Rectum	United States	New York	NA	NA	0	0	0	0	0	0	0	1	1	0	0	0
ERR1837125	1	M	MSM	Urethra	United States	New York	NA	NA	1	0	0	0	0	0	0	0	0	0	0	0
ERR1837126	1	NA	NA	NA	United States	New York	NA	NA	0	0	0	0	0	1	0	0	1	0	0	0
ERR1837127	1	M	MSW/WSM	Urethra	United States	New York	NA	NA	0	0	0	0	0	0	0	0	0	0	0	0
ERR1837128	1	NA	NA	NA	United States	New York	NA	NA	0	0	1	0	0	0	0	1	1	0	0	0
ERR1837129	1	M	MSM	Urethra	United States	New York	NA	NA	0	0	0	0	0	0	0	0	0	0	0	0
ERR1837130	1	M	NA	Urethra	United States	New York	NA	NA	0	0	0	0	0	0	0	0	1	0	0	0
ERR1837131	1	M	MSM	Urethra	United States	New York	NA	NA	0	0	0	0	0	0	0	1	1	0	0	0
ERR1837132	1	M	MSW/WSM	Urethra	United States	New York	NA	NA	0	0	0	0	0	0	0	0	0	0	0	0
ERR1837133	1	M	MSM	Urethra	United States	New York	NA	NA	1	0	0	0	0	0	0	0	0	0	0	0
ERR2631723	1	M	MSM	Urethra	United States	New York	NA	NA	0	0	0	0	0	0	0	1	1	0	0	0
ERR2631724	1	M	MSM	Urethra	United States	New York	NA	NA	1	0	0	0	0	0	0	0	0	0	0	0
ERR2631725	1	M	MSM	Urethra	United States	New York	NA	NA	0	0	0	0	0	0	0	1	1	0	0	0
ERR2631727	1	M	MSM	Urethra	United States	New York	NA	NA	0	0	0	0	0	0	0	0	1	0	0	0
ERR2631728	1	M	MSM	Urethra	United States	New York	NA	NA	0	0	0	1	0	0	0	0	0	0	0	0
ERR2631729	1	M	MSW/WSM	Urethra	United States	New York	NA	NA	0	0	0	0	0	0	0	0	0	0	0	0
ERR2631730	1	M	MSM	Rectum	United States	New York	NA	NA	0	0	0	0	0	0	0	0	1	0	0	0
ERR2631731	1	M	MSW/WSM	Urethra	United States	New York	NA	NA	0	0	0	0	0	0	0	0	0	0	0	0
ERR2631732	1	M	MSW/WSM	Urethra	United States	New York	NA	NA	0	0	0	0	0	0	0	0	0	0	0	0
ERR2631733	1	M	MSW/WSM	Urethra	United States	New York	NA	NA	0	0	0	0	0	0	0	0	1	0	0	0
ERR2631734	1	M	MSW/WSM	Urethra	United States	New York	NA	NA	1	0	0	0	0	0	0	0	1	0	0	0
ERR2631735	1	M	MSM	Urethra	United States	New York	NA	NA	0	0	0	0	0	0	0	0	1	0	0	0
ERR2631736	1	M	MSM	Rectum	United States	New York	NA	NA	0	0	0	0	0	0	0	1	1	0	0	0
ERR2631737	1	M	MSM	Urethra	United States	New York	NA	NA	0	0	0	0	0	0	0	1	1	1	0	0
ERR2631738	1	M	MSM	Rectum	United States	New York	NA	NA	0	0	0	0	0	0	0	1	1	0	0	0
ERR2631739	1	M	MSM	Urethra	United States	New York	NA	NA	0	0	0	0	0	0	0	1	1	0	0	0
ERR2631740	1	M	MSM	Urethra	United States	New York	NA	NA	0	0	0	0	0	0	0	0	0	0	0	0
ERR2631742	1	M	NA	Urethra	United States	New York	NA	NA	0	0	0	0	0	0	0	0	0	0	0	0
ERR2631743	1	M	MSM	Urethra	United States	New York	NA	NA	0	0	0	0	0	0	0	1	1	0	0	0
ERR2631744	1	M	MSM	Pharynx	United States	New York	NA	NA	0	0	0	0	0	0	0	0	0	0	0	0
ERR2631745	1	M	MSW/WSM	Urethra	United States	New York	NA	NA	0	0	0	0	0	0	0	0	1	0	0	0
ERR2631746	1	M	MSM	Urethra	United States	New York	NA	NA	1	0	0	0	0	0	0	0	1	0	0	0
ERR2631747	1	M	MSM	Urethra	United States	New York	NA	NA	0	0	0	0	0	0	0	0	0	0	0	0
ERR2631748	1	M	MSM	Urethra	United States	New York	NA	NA	0	0	0	0	0	0	0	1	0	0	0	0
ERR2631749	1	M	MSM	Urethra	United States	New York	NA	NA	0	0	0	0	0	0	0	0	1	0	0	0
ERR2631750	1	M	MSM	Urethra	United States	New York	NA	NA	0	0	0	0	0	0	0	1	1	0	0	0
ERR2631751	1	M	MSM	Rectum	United States	New York	NA	NA	0	0	0	0	0	0	0	1	1	0	0	0
ERR2631752	1	M	MSM	Rectum	United States	New York	NA	NA	0	0	0	0	0	0	0	1	1	0	0	0
ERR2631753	1	M	MSM	Urethra	United States	New York	NA	NA	0	0	0	0	0	0	0	0	1	1	0	0
ERR2631754	1	M	MSM	Urethra	United States	New York	NA	NA	0	0	1	0	0	0	0	1	1	1	0	1
ERR2631755	1	M	MSM	Urethra	United States	New York	NA	NA	0	0	0	0	0	0	0	1	1	0	0	0
ERR2631756	1	M	MSW/WSM	Urethra	United States	New York	NA	NA	0	0	0	0	0	0	0	0	0	0	0	0
ERR2631757	1	M	MSW/WSM	Urethra	United States	New York	NA	NA	0	0	0	0	0	0	0	0	0	0	0	0
ERR2631758	1	M	MSW/WSM	Urethra	United States	New York	NA	NA	0	0	0	0	0	0	0	0	0	0	0	0
ERR2631759	1	M	MSM	Urethra	United States	New York	NA	NA	0	0	0	0	0	0	0	0	0	0	0	0
ERR2631760	1	M	MSM	Rectum	United States	New York	NA	NA	0	0	0	0	0	0	0	1	1	0	0	0
ERR2631761	1	M	MSM	Urethra	United States	New York	NA	NA	1	0	0	0	0	0	0	0	0	0	0	0
ERR2631762	1	M	MSM	Pharynx	United States	New York	NA	NA	0	0	0	0	0	0	0	0	0	0	0	0
ERR2631763	1	M	MSM	Rectum	United States	New York	NA	NA	0	0	0	0	0	0	0	0	0	0	0	0
ERR2631764	1	M	MSM	Urethra	United States	New York	NA	NA	0	0	0	0	0	0	0	1	1	1	0	0
ERR2631765	1	M	MSM	Urethra	United States	New York	NA	NA	0	0	0	0	0	0	0	1	0	0	0	0
ERR2631766	1	M	MSM	Urethra	United States	New York	NA	NA	0	0	0	0	0	0	0	0	0	0	0	0
ERR2631767	1	M	MSM	Urethra	United States	New York	NA	NA	0	0	0	0	0	0	0	1	0	0	0	0
ERR2631768	1	M	MSM	Rectum	United States	New York	NA	NA	0	0	0	0	0	0	0	0	0	0	0	0
ERR2631769	1	M	MSM	Urethra	United States	New York	NA	NA	0	0	0	0	0	0	0	1	1	0	0	0
ERR2631770	1	M	MSM	Urethra	United States	New York	NA	NA	0	0	0	0	0	0	0	0	1	0	0	0
ERR2631771	1	M	MSM	Urethra	United States	New York	NA	NA	0	0	0	0	0	0	0	1	1	0	0	0
ERR2631772	1	M	MSM	Urethra	United States	New York	NA	NA	0	0	0	0	0	0	0	1	1	0	0	0
ERR2631773	1	M	MSM	Urethra	United States	New York	NA	NA	0	0	0	0	0	0	0	0	0	0	0	0
ERR2631774	1	M	MSM	Rectum	United States	New York	NA	NA	0	0	0	0	0	0	0	0	1	0	0	0
ERR2631775	1	M	MSM	Urethra	United States	New York	NA	NA	1	0	0	0	0	0	0	0	0	0	0	0
ERR2631776	1	M	NA	Urethra	United States	New York	NA	NA	0	0	0	0	0	0	0	0	0	0	0	0
ERR2631777	1	M	MSM	Urethra	United States	New York	NA	NA	0	0	0	0	0	0	0	0	0	0	0	0
ERR2631778	1	M	MSM	Urethra	United States	New York	NA	NA	0	0	0	0	0	0	0	0	0	0	0	0
ERR2631779	1	M	MSM	Urethra	United States	New York	NA	NA	0	0	0	0	0	0	0	0	0	0	0	0
ERR2631780	1	M	MSM	Urethra	United States	New York	NA	NA	0	1	0	0	0	0	0	1	1	0	0	1
ERR2631781	1	M	MSM	Rectum	United States	New York	NA	NA	0	0	0	0	0	0	0	0	0	0	0	0
ERR2631782	1	M	MSM	Rectum	United States	New York	NA	NA	0	0	0	0	0	0	0	0	1	0	0	0
ERR2631783	1	M	MSM	Urethra	United States	New York	NA	NA	0	0	0	0	0	0	0	0	1	0	0	0
ERR2631784	1	M	MSM	Urethra	United States	New York	NA	NA	0	0	0	0	0	0	0	0	1	0	0	0
ERR2631785	1	M	NA	Rectum	United States	New York	NA	NA	0	0	0	0	0	0	0	0	1	0	0	0
ERR2631786	1	M	NA	Rectum	United States	New York	NA	NA	0	0	0	0	0	0	0	1	1	0	0	0
ERR2631794	1	M	MSM	Urethra	United States	New York	NA	NA	0	0	0	0	0	0	0	1	0	0	0	0
ERR2631795	1	M	MSM	Urethra	United States	New York	NA	NA	0	0	0	0	0	0	0	1	0	0	0	0
ERR2631796	1	M	MSM	Urethra	United States	New York	NA	NA	0	0	0	0	0	0	0	0	1	0	0	0
ERR2631797	1	M	MSW/WSM	Urethra	United States	New York	NA	NA	0	0	0	0	0	0	0	0	0	0	0	0
ERR2631798	1	M	MSM	Rectum	United States	New York	NA	NA	0	0	1	0	0	0	0	1	1	0	0	0
ERR2631799	1	W	MSW/WSM	Cervix	United States	New York	NA	NA	0	0	0	0	0	0	0	0	1	0	0	0
ERR2631800	1	M	MSM	Rectum	United States	New York	NA	NA	0	0	0	0	0	0	0	0	0	0	0	0
ERR2631801	1	M	MSM	Pharynx	United States	New York	NA	NA	0	0	0	0	0	0	0	0	0	0	0	0
ERR2631802	1	W	MSW/WSM	Cervix	United States	New York	NA	NA	0	0	0	0	0	0	0	0	0	0	0	0
ERR2631803	1	NA	NA	Rectum	United States	New York	NA	NA	0	0	0	0	0	0	0	1	1	0	NA	0
ERR2631807	1	M	MSM	Pharynx	United States	New York	NA	NA	0	0	0	0	0	0	0	0	0	0	0	0
ERR2631808	1	M	MSM	Rectum	United States	New York	NA	NA	0	0	0	0	0	0	0	0	0	0	0	0
ERR2631809	1	M	NA	Pharynx	United States	New York	NA	NA	0	0	0	0	0	0	0	0	0	0	0	0
ERR2631810	1	M	MSW/WSM	Urethra	United States	New York	NA	NA	0	0	0	0	0	0	0	0	1	0	0	0
ERR2631811	1	M	MSW/WSM	Urethra	United States	New York	NA	NA	1	0	0	0	0	0	0	0	0	0	0	0
ERR2631812	1	W	MSW/WSM	Cervix	United States	New York	NA	NA	0	0	0	0	0	0	0	0	1	0	0	0
ERR2631813	1	M	NA	Urethra	United States	New York	NA	NA	0	0	0	0	0	0	0	0	1	0	0	0
ERR2631814	1	M	MSW/WSM	Urethra	United States	New York	NA	NA	0	0	0	0	0	0	0	0	0	0	0	0
ERR2631815	1	M	MSM	Urethra	United States	New York	NA	NA	0	0	0	0	0	0	0	1	1	0	0	0
ERR2631816	1	M	MSW/WSM	Urethra	United States	New York	NA	NA	0	0	0	0	0	0	0	0	0	0	0	0
ERR2631817	1	M	MSW/WSM	Urethra	United States	New York	NA	NA	0	0	0	0	0	0	0	0	0	0	0	NA
ERR2631818	1	M	MSW/WSM	Urethra	United States	New York	NA	NA	0	0	1	0	0	0	0	1	0	0	0	NA
ERR2631819	1	M	MSM	Urethra	United States	New York	NA	NA	0	0	0	0	0	0	0	0	0	0	0	0
ERR2631822	1	M	NA	Urethra	United States	New York	NA	NA	1	0	0	0	0	0	0	0	0	0	0	0
ERR2631824	1	M	MSW/WSM	Urethra	United States	New York	NA	NA	0	0	0	0	0	0	0	0	0	0	0	0
ERR2631828	1	M	MSW/WSM	Urethra	United States	New York	NA	NA	1	0	0	0	0	0	0	0	0	0	0	0
ERR2631829	1	M	MSW/WSM	Urethra	United States	New York	NA	NA	1	0	0	0	0	0	0	0	0	0	0	NA
ERR2631830	1	M	MSW/WSM	Urethra	United States	New York	NA	NA	1	0	0	0	0	0	0	0	0	0	0	0
ERR2631831	1	W	MSW/WSM	Cervix	United States	New York	NA	NA	0	0	0	0	0	0	0	0	0	0	0	0
ERR2631833	1	M	MSM	Rectum	United States	New York	NA	NA	0	0	0	0	0	0	0	0	0	0	0	0
ERR2631834	1	M	MSM	Pharynx	United States	New York	NA	NA	0	0	1	0	0	0	0	1	1	0	0	0
ERR2631835	1	M	MSM	Rectum	United States	New York	NA	NA	0	0	0	0	0	0	0	0	0	0	0	0
ERR2631836	1	M	MSM	Pharynx	United States	New York	NA	NA	0	0	0	0	0	0	0	0	0	0	0	0
ERR2631837	1	M	NA	Rectum	United States	New York	NA	NA	0	0	0	0	0	0	0	0	0	0	0	0
ERR2631838	1	W	MSW/WSM	Cervix	United States	New York	NA	NA	0	0	0	0	0	1	0	0	0	0	0	NA
ERR2631840	1	M	MSM	Pharynx	United States	New York	NA	NA	0	0	0	0	0	0	0	0	0	0	0	0
ERR2631841	1	M	MSM	Rectum	United States	New York	NA	NA	0	0	0	0	0	0	0	1	1	0	0	NA
ERR2631843	1	W	MSW/WSM	Cervix	United States	New York	NA	NA	0	0	0	0	0	0	0	0	0	0	0	NA
ERR2631844	1	M	MSW/WSM	Urethra	United States	New York	NA	NA	0	0	1	0	0	0	0	1	1	0	0	0
ERR2631845	1	M	MSW/WSM	Urethra	United States	New York	NA	NA	0	0	0	0	0	0	0	0	0	0	0	NA
ERR2631846	1	M	MSW/WSM	Urethra	United States	New York	NA	NA	0	0	0	0	0	0	0	0	0	0	0	0
ERR2631847	1	M	MSM	Urethra	United States	New York	NA	NA	1	0	0	0	0	0	0	0	0	0	0	0
ERR2631848	1	M	MSM	Pharynx	United States	New York	NA	NA	1	0	0	0	0	0	0	0	0	0	0	0
ERR2631849	1	W	MSW/WSM	Cervix	United States	New York	NA	NA	0	0	0	0	0	0	0	0	0	0	0	NA
ERR2631853	1	M	MSM	Rectum	United States	New York	NA	NA	0	0	0	0	0	0	0	0	0	0	0	0
ERR2631854	1	M	MSM	Rectum	United States	New York	NA	NA	0	0	0	0	0	0	0	0	0	0	0	0
ERR2631855	1	M	MSM	Urethra	United States	New York	NA	NA	0	0	0	0	0	0	0	0	1	0	0	0
ERR2631857	1	M	MSW/WSM	Urethra	United States	New York	NA	NA	0	0	0	0	0	0	0	0	0	0	0	0
ERR2631858	1	NA	NA	Rectum	United States	New York	NA	NA	0	0	0	0	0	0	0	0	1	0	0	0
ERR2631859	1	W	MSW/WSM	Cervix	United States	New York	NA	NA	0	0	0	0	0	1	0	0	1	0	0	0
ERR2631860	1	M	MSM	Rectum	United States	New York	NA	NA	0	0	0	0	0	0	0	0	0	0	0	0
ERR2631861	1	M	MSW/WSM	Urethra	United States	New York	NA	NA	0	0	0	0	0	0	0	0	0	0	0	0
ERR2631862	1	M	NA	Urethra	United States	New York	NA	NA	0	0	0	0	0	0	0	0	1	0	0	1
ERR2631863	1	M	MSM	Urethra	United States	New York	NA	NA	0	0	0	0	0	1	0	0	1	0	0	0
ERR2631864	1	M	MSW/WSM	Urethra	United States	New York	NA	NA	0	0	0	0	0	0	0	0	0	0	0	0
ERR2631865	1	M	MSM	Rectum	United States	New York	NA	NA	1	0	0	0	0	0	0	0	0	NA	NA	NA
ERR2631867	1	M	MSM	Rectum	United States	New York	NA	NA	0	0	0	0	0	0	0	0	1	0	0	0
ERR2631868	1	M	MSM	Pharynx	United States	New York	NA	NA	0	0	0	0	0	0	0	1	0	0	0	0
ERR2631869	1	M	MSM	Pharynx	United States	New York	NA	NA	0	0	0	0	0	0	0	0	1	0	0	1
ERR2631870	1	M	MSM	Pharynx	United States	New York	NA	NA	0	0	0	0	0	0	0	0	0	0	0	0
ERR2631871	1	NA	NA	Pharynx	United States	New York	NA	NA	0	0	0	0	0	0	0	1	0	0	0	0
ERR2631872	1	W	MSW/WSM	Cervix	United States	New York	NA	NA	0	0	0	0	0	0	0	0	1	0	0	0
ERR2631873	1	NA	NA	Urethra	United States	New York	NA	NA	0	0	0	0	0	0	0	0	0	0	0	0
ERR2631874	1	M	MSW/WSM	Urethra	United States	New York	NA	NA	0	0	0	0	0	0	0	1	1	0	0	0
ERR2631875	1	M	MSM	Urethra	United States	New York	NA	NA	1	0	0	0	0	0	0	0	0	0	0	0
ERR2631876	1	M	MSW/WSM	Urethra	United States	New York	NA	NA	0	0	0	0	0	0	0	0	1	0	0	0
ERR2631877	1	M	MSW/WSM	Urethra	United States	New York	NA	NA	0	0	0	0	0	1	0	0	0	0	0	0
ERR2631878	1	M	MSM	Urethra	United States	New York	NA	NA	0	0	0	0	0	0	0	0	0	0	0	0
ERR2631879	1	M	MSM	Urethra	United States	New York	NA	NA	0	0	0	0	0	0	0	0	1	0	0	1
ERR2631880	1	M	MSW/WSM	Urethra	United States	New York	NA	NA	0	0	0	0	0	0	0	1	1	0	0	0
ERR2631881	1	M	MSM	Urethra	United States	New York	NA	NA	0	0	0	0	0	0	0	1	1	0	0	0
ERR2631883	1	M	MSM	Urethra	United States	New York	NA	NA	0	0	0	0	0	0	0	0	0	0	0	0
ERR2631884	1	W	MSW/WSM	Cervix	United States	New York	NA	NA	0	0	0	0	0	0	0	0	1	0	0	0
ERR2631885	1	M	MSM	Rectum	United States	New York	NA	NA	0	0	0	0	0	0	0	0	0	0	0	0
ERR2631886	1	M	MSW/WSM	Urethra	United States	New York	NA	NA	1	0	0	0	0	0	0	0	0	0	0	0
ERR2631887	1	M	MSM	Rectum	United States	New York	NA	NA	0	0	0	0	0	0	0	1	1	0	0	0
ERR2631888	1	M	MSM	Urethra	United States	New York	NA	NA	0	0	0	0	0	0	0	1	1	0	0	0
ERR2631889	1	M	MSM	Urethra	United States	New York	NA	NA	0	0	0	0	0	0	0	1	0	0	0	0
ERR2631890	1	M	MSM	Urethra	United States	New York	NA	NA	0	0	0	0	0	0	0	1	1	0	0	0
ERR2631891	1	M	MSM	Urethra	United States	New York	NA	NA	1	0	0	0	0	0	0	0	0	0	0	0
ERR2631893	1	M	MSM	Urethra	United States	New York	NA	NA	1	0	0	0	0	0	0	0	0	0	0	0
ERR2631894	1	M	MSW/WSM	Urethra	United States	New York	NA	NA	0	0	0	0	0	0	0	1	1	1	0	0
ERR2631895	1	M	MSW/WSM	Urethra	United States	New York	NA	NA	0	0	0	0	0	0	0	0	0	0	0	0
ERR2631896	1	M	MSM	Rectum	United States	New York	NA	NA	1	0	0	0	0	0	0	0	0	0	0	0
ERR2631897	1	M	MSM	Urethra	United States	New York	NA	NA	0	0	0	0	0	0	0	1	1	0	0	0
ERR2631898	1	M	MSM	Urethra	United States	New York	NA	NA	0	0	0	0	0	0	0	0	1	0	0	0
ERR2631899	1	M	MSM	Urethra	United States	New York	NA	NA	0	0	0	0	0	0	0	0	0	NA	NA	NA
ERR2631900	1	M	NA	Urethra	United States	New York	NA	NA	0	0	1	0	0	0	0	1	1	0	0	0
ERR2631901	1	M	MSM	Rectum	United States	New York	NA	NA	0	0	0	0	0	0	0	1	1	0	0	0
ERR2631902	1	M	NA	Urethra	United States	New York	NA	NA	1	0	0	0	0	0	0	0	0	0	0	0
ERR2631903	1	M	MSW/WSM	Urethra	United States	New York	NA	NA	0	0	0	0	0	0	0	0	1	0	0	0
ERR2631904	1	M	NA	Rectum	United States	New York	NA	NA	0	0	0	0	0	0	0	0	0	0	0	0
ERR2631905	1	M	MSM	Urethra	United States	New York	NA	NA	0	0	0	0	0	0	0	0	0	0	0	0
ERR2631906	1	M	MSM	Urethra	United States	New York	NA	NA	0	0	0	0	0	0	0	1	1	0	0	0
ERR2631907	1	M	MSM	Rectum	United States	New York	NA	NA	0	0	0	0	0	0	0	1	1	0	0	0
ERR2631910	1	M	MSM	Urethra	United States	New York	NA	NA	0	0	0	0	0	0	0	0	0	0	0	0
ERR2631911	1	M	MSM	Rectum	United States	New York	NA	NA	0	0	0	0	0	0	0	1	1	NA	NA	NA
ERR2631912	1	M	MSM	Urethra	United States	New York	NA	NA	0	0	0	0	0	0	0	0	0	0	0	0
ERR2631913	1	M	MSW/WSM	Urethra	United States	New York	NA	NA	0	0	0	0	0	0	0	0	1	0	0	0
ERR2631914	1	M	MSM	Urethra	United States	New York	NA	NA	0	0	0	0	0	0	0	1	1	0	0	0
ERR2631915	1	M	MSW/WSM	Urethra	United States	New York	NA	NA	0	0	0	0	0	0	0	0	0	0	0	0
ERR2631916	1	M	MSM	Urethra	United States	New York	NA	NA	0	0	0	0	0	0	0	0	1	0	0	0
ERR2631917	1	NA	NA	Rectum	United States	New York	NA	NA	0	0	0	0	0	0	0	0	0	0	0	0
ERR2631918	1	M	MSM	Urethra	United States	New York	NA	NA	0	0	0	0	0	0	0	0	1	0	0	0
ERR2631919	1	M	MSM	Urethra	United States	New York	NA	NA	0	0	0	0	0	0	0	0	0	0	0	0
ERR2631920	1	M	MSM	Urethra	United States	New York	NA	NA	0	0	0	0	0	0	0	1	1	0	0	0
ERR2631921	1	M	MSM	Urethra	United States	New York	NA	NA	0	0	0	0	0	0	0	0	1	0	0	0
ERR2631922	1	M	MSM	Urethra	United States	New York	NA	NA	0	0	0	0	0	0	0	1	1	0	0	0
ERR2631923	1	M	MSM	Pharynx	United States	New York	NA	NA	0	0	0	0	0	0	0	1	1	0	0	0
ERR2631924	1	M	MSM	Urethra	United States	New York	NA	NA	0	0	0	0	0	0	0	0	1	0	0	0
ERR2631925	1	M	MSW/WSM	Urethra	United States	New York	NA	NA	0	0	0	0	0	0	0	0	1	0	0	0
ERR2631926	1	M	MSM	Urethra	United States	New York	NA	NA	0	0	0	0	0	0	0	0	0	0	0	0
ERR2631927	1	M	MSM	Pharynx	United States	New York	NA	NA	0	0	0	0	0	0	0	0	1	0	0	0
ERR2631928	1	M	MSM	Urethra	United States	New York	NA	NA	0	0	0	0	0	0	0	1	1	0	0	0
ERR2631929	1	M	MSM	Urethra	United States	New York	NA	NA	1	0	0	0	0	0	0	0	0	0	0	0
ERR2631930	1	M	MSW/WSM	Urethra	United States	New York	NA	NA	0	0	0	0	0	0	0	1	1	0	0	0
ERR2631931	1	M	MSM	Urethra	United States	New York	NA	NA	0	0	0	0	0	0	0	0	1	0	0	0
ERR2631932	1	M	MSM	Urethra	United States	New York	NA	NA	0	0	0	0	0	0	0	1	1	0	0	0
ERR2631933	1	M	MSM	Urethra	United States	New York	NA	NA	0	0	0	0	0	0	0	0	0	0	0	0
ERR2631934	1	M	MSM	Urethra	United States	New York	NA	NA	0	0	0	0	0	0	0	0	0	0	0	0
ERR2631935	1	M	MSW/WSM	Urethra	United States	New York	NA	NA	0	0	1	0	0	0	0	1	1	0	0	0
ERR2631936	1	M	MSW/WSM	Urethra	United States	New York	NA	NA	0	0	0	0	0	0	0	0	0	0	0	0
ERR2631937	1	M	MSM	Urethra	United States	New York	NA	NA	0	0	0	0	0	0	0	0	0	0	0	0
ERR2631938	1	M	MSM	Urethra	United States	New York	NA	NA	0	0	0	0	0	0	0	0	1	0	0	0
ERR2631939	1	M	MSM	Rectum	United States	New York	NA	NA	0	0	0	0	0	0	0	0	1	0	0	0
ERR2631941	1	M	MSM	Rectum	United States	New York	NA	NA	0	0	0	0	0	0	0	0	1	0	0	0
ERR2631942	1	M	MSW/WSM	Urethra	United States	New York	NA	NA	1	0	0	0	0	0	0	0	0	0	0	0
ERR2631947	1	M	MSM	Urethra	United States	New York	NA	NA	0	0	0	0	0	0	0	1	1	0	0	0
ERR2631949	1	M	MSM	Urethra	United States	New York	NA	NA	1	0	0	0	0	0	0	0	0	0	0	0
ERR2631950	1	M	MSM	Pharynx	United States	New York	NA	NA	0	0	0	0	0	0	0	1	1	0	0	0
ERR2631951	1	M	MSW/WSM	Urethra	United States	New York	NA	NA	0	0	0	0	0	0	0	0	1	0	0	0
ERR2631952	1	M	MSW/WSM	Urethra	United States	New York	NA	NA	0	0	0	0	0	0	0	0	1	0	0	0
ERR2631953	1	M	MSM	Urethra	United States	New York	NA	NA	0	0	0	0	0	0	0	1	0	0	0	0
ERR2631954	1	M	MSM	Urethra	United States	New York	NA	NA	0	0	0	0	0	0	0	0	1	0	0	0
ERR2631955	1	M	MSM	Urethra	United States	New York	NA	NA	0	0	0	0	0	0	0	1	1	0	0	0
ERR2631956	1	M	MSM	Rectum	United States	New York	NA	NA	0	0	0	0	0	0	0	1	1	0	0	0
ERR2631957	1	M	MSM	Urethra	United States	New York	NA	NA	0	0	0	0	0	0	0	0	0	0	0	0
ERR2631958	1	M	MSW/WSM	Urethra	United States	New York	NA	NA	0	0	0	0	0	0	0	1	1	0	0	0
ERR2631959	1	M	NA	Urethra	United States	New York	NA	NA	0	0	0	0	0	0	0	0	0	0	0	0
ERR2631960	1	M	MSM	Urethra	United States	New York	NA	NA	0	0	0	0	0	0	0	0	0	0	0	0
ERR2631962	1	M	MSM	Rectum	United States	New York	NA	NA	0	0	0	0	0	0	0	0	1	0	0	0
ERR2631963	1	M	MSM	Urethra	United States	New York	NA	NA	0	0	0	0	0	0	0	0	0	0	0	0
ERR2631964	1	M	MSM	Urethra	United States	New York	NA	NA	0	0	0	0	0	0	0	0	0	0	0	0
ERR2631965	1	M	MSM	Urethra	United States	New York	NA	NA	0	0	0	0	0	0	0	1	1	0	0	0
ERR2631966	1	M	MSM	Urethra	United States	New York	NA	NA	0	0	0	0	0	0	0	0	0	0	0	0
ERR2631967	1	M	MSM	Urethra	United States	New York	NA	NA	0	0	0	0	0	0	0	0	0	0	0	0
ERR2631968	1	M	MSM	Urethra	United States	New York	NA	NA	1	0	0	0	0	0	0	0	0	0	0	0
ERR2631969	1	M	MSM	Urethra	United States	New York	NA	NA	0	0	0	0	0	0	0	1	1	0	0	0
ERR2631970	1	M	MSM	Urethra	United States	New York	NA	NA	0	0	1	0	0	0	0	1	1	0	0	0
ERR2631971	1	M	MSM	Urethra	United States	New York	NA	NA	0	0	0	0	0	0	0	1	1	0	1	0
ERR2631972	1	M	MSM	Urethra	United States	New York	NA	NA	0	0	1	0	0	0	0	1	1	0	0	0
ERR2631973	1	M	MSM	Urethra	United States	New York	NA	NA	0	0	0	0	0	0	0	1	1	0	0	0
ERR2631974	1	M	MSM	Urethra	United States	New York	NA	NA	0	0	0	0	0	0	0	1	1	0	0	0
ERR2631975	1	M	MSM	Urethra	United States	New York	NA	NA	0	0	0	0	0	0	0	0	1	0	0	0
ERR2631976	1	M	MSM	Urethra	United States	New York	NA	NA	0	0	0	0	0	0	0	0	1	0	0	0
ERR2631977	1	M	MSM	Urethra	United States	New York	NA	NA	0	0	0	0	0	0	0	0	0	0	0	0
ERR2631978	1	M	MSM	Urethra	United States	New York	NA	NA	0	0	0	0	0	0	0	1	1	0	0	0
ERR2631979	1	M	MSM	Urethra	United States	New York	NA	NA	0	0	0	0	0	0	0	0	0	0	0	0
ERR2631980	1	M	MSM	Rectum	United States	New York	NA	NA	0	0	0	0	0	0	0	1	1	0	0	0
ERR2631981	1	M	MSM	Urethra	United States	New York	NA	NA	0	0	0	0	0	0	0	0	1	0	0	0
ERR2631982	1	M	MSM	Urethra	United States	New York	NA	NA	1	0	0	0	0	0	0	0	0	0	0	0
ERR2631983	1	M	MSM	Urethra	United States	New York	NA	NA	0	0	1	0	0	0	0	1	1	0	0	0
ERR2631984	1	M	MSM	Pharynx	United States	New York	NA	NA	0	0	0	0	0	0	0	0	1	0	0	0
ERR2631985	1	M	MSM	Rectum	United States	New York	NA	NA	0	0	0	0	0	0	0	1	1	0	0	0
ERR2631986	1	M	MSM	Urethra	United States	New York	NA	NA	0	0	0	0	0	0	0	1	1	0	0	0
ERR2631987	1	M	MSM	Urethra	United States	New York	NA	NA	0	0	0	0	0	0	0	1	1	0	0	0
ERR2631988	1	M	MSM	Rectum	United States	New York	NA	NA	0	0	0	0	0	0	0	1	1	0	0	0
ERR2631989	1	M	MSM	Rectum	United States	New York	NA	NA	0	0	1	0	0	0	0	1	1	0	NA	0
ERR2631991	1	M	MSM	Urethra	United States	New York	NA	NA	0	0	0	0	0	0	0	1	1	0	0	0
ERR2631992	1	M	MSM	Pharynx	United States	New York	NA	NA	0	0	0	0	0	0	0	1	1	0	0	0
ERR2631993	1	M	MSM	Rectum	United States	New York	NA	NA	0	0	0	0	0	0	0	0	1	0	0	0
ERR2631994	1	M	MSM	Urethra	United States	New York	NA	NA	0	0	0	0	0	0	0	0	0	0	NA	0
ERR2631995	1	M	MSM	Urethra	United States	New York	NA	NA	0	0	0	0	0	0	0	0	0	0	0	0
ERR2631996	1	M	MSM	Urethra	United States	New York	NA	NA	0	0	0	0	0	0	0	0	1	0	0	0
ERR2631997	1	M	MSM	Urethra	United States	New York	NA	NA	0	0	0	0	0	0	0	1	1	0	0	0
ERR2631998	1	M	MSW/WSM	Urethra	United States	New York	NA	NA	0	0	0	0	0	0	0	1	1	1	0	0
ERR2631999	1	M	MSM	Urethra	United States	New York	NA	NA	0	0	0	0	0	0	0	1	1	0	0	0
ERR2632000	1	M	MSM	Rectum	United States	New York	NA	NA	0	0	0	0	0	0	0	0	1	0	0	0
ERR2632001	1	M	MSM	Rectum	United States	New York	NA	NA	0	0	0	0	0	0	0	0	0	0	0	0
ERR2632002	1	M	MSM	Urethra	United States	New York	NA	NA	0	0	0	0	0	0	0	1	0	0	0	0
ERR2632003	1	M	MSM	Urethra	United States	New York	NA	NA	0	0	0	0	0	0	0	0	0	0	0	0
ERR2632004	1	M	MSM	Rectum	United States	New York	NA	NA	1	0	0	0	0	0	0	0	0	0	0	0
ERR2632005	1	M	MSM	Urethra	United States	New York	NA	NA	0	0	0	0	0	0	0	0	1	0	0	0
ERR2632006	1	M	MSM	Urethra	United States	New York	NA	NA	0	0	0	0	0	0	0	0	0	0	0	0
ERR2632007	1	M	MSM	Urethra	United States	New York	NA	NA	0	0	0	0	0	0	0	0	1	0	0	0
ERR2632008	1	M	MSW/WSM	Urethra	United States	New York	NA	NA	0	0	0	0	0	0	0	0	1	0	0	0
ERR2632009	1	M	MSM	Urethra	United States	New York	NA	NA	0	0	0	0	0	0	0	0	1	0	0	0
ERR2632010	1	M	MSM	Urethra	United States	New York	NA	NA	1	0	0	0	0	0	0	0	0	0	0	0
ERR2632011	1	M	MSM	Urethra	United States	New York	NA	NA	0	0	0	0	0	0	0	1	1	0	0	0
ERR2632012	1	M	MSM	Urethra	United States	New York	NA	NA	0	0	0	0	0	0	0	1	1	0	0	0
ERR2632013	1	M	MSM	Urethra	United States	New York	NA	NA	0	0	0	0	0	0	0	0	0	0	0	0
ERR2632014	1	M	MSW/WSM	Urethra	United States	New York	NA	NA	0	0	0	0	0	0	0	0	1	0	0	0
ERR2632015	1	M	MSW/WSM	Urethra	United States	New York	NA	NA	0	0	0	0	0	0	0	0	0	0	0	0
ERR2632016	1	M	MSW/WSM	Urethra	United States	New York	NA	NA	0	0	0	0	0	0	0	0	1	0	0	0
ERR2632017	1	M	MSW/WSM	Urethra	United States	New York	NA	NA	0	0	0	0	0	0	0	0	0	0	0	0
ERR2632018	1	M	NA	Rectum	United States	New York	NA	NA	0	0	0	0	0	0	0	0	1	0	0	0
ERR2632019	1	M	MSM	Pharynx	United States	New York	NA	NA	0	0	0	0	0	0	0	0	0	0	0	0
ERR2632020	1	M	MSM	Pharynx	United States	New York	NA	NA	0	0	0	0	0	0	0	0	1	0	0	0
ERR2632021	1	M	MSW/WSM	Urethra	United States	New York	NA	NA	0	0	0	0	0	0	0	0	0	0	0	0
ERR2632022	1	M	MSW/WSM	Urethra	United States	New York	NA	NA	0	0	0	0	0	0	0	0	1	0	0	0
ERR2632026	1	M	MSW/WSM	Urethra	United States	New York	NA	NA	0	0	0	0	0	0	0	0	0	0	0	0
ERR2632028	1	M	MSW/WSM	Urethra	United States	New York	NA	NA	0	0	0	0	0	0	0	0	1	0	0	0
ERR2632033	1	M	MSM	Urethra	United States	New York	NA	NA	1	0	0	0	0	0	0	0	0	0	0	0
ERR2632034	1	M	MSM	Urethra	United States	New York	NA	NA	1	0	0	0	0	0	0	0	0	0	0	0
ERR2632035	1	M	MSM	Urethra	United States	New York	NA	NA	1	0	0	0	0	0	0	0	0	0	0	0
ERR2632036	1	M	MSM	Urethra	United States	New York	NA	NA	0	0	0	0	0	0	0	0	0	0	0	0
ERR2632037	1	M	MSM	Urethra	United States	New York	NA	NA	0	0	0	0	0	0	0	1	1	0	0	0
ERR2632038	1	M	MSM	Urethra	United States	New York	NA	NA	0	0	0	0	0	0	0	0	1	0	0	0
ERR2632039	1	M	MSM	Urethra	United States	New York	NA	NA	0	0	0	0	0	0	0	0	0	0	0	0
ERR2632040	1	M	MSM	Urethra	United States	New York	NA	NA	0	0	0	0	0	1	0	0	1	0	0	NA
ERR2632041	1	M	MSM	Rectum	United States	New York	NA	NA	0	0	0	0	0	0	0	0	0	0	0	0
ERR2632042	1	M	MSM	Urethra	United States	New York	NA	NA	0	0	0	0	0	0	0	0	0	0	0	NA
ERR2632043	1	M	MSM	Urethra	United States	New York	NA	NA	0	0	0	0	0	0	0	0	1	0	0	0
ERR2632044	1	M	MSM	Rectum	United States	New York	NA	NA	0	0	0	0	0	0	0	0	1	0	0	0
ERR2632045	1	M	MSM	Urethra	United States	New York	NA	NA	1	0	0	0	0	0	0	0	0	0	0	0
ERR3200812	1	M	MSW/WSM	Urethra	United States	New York	NA	NA	0	0	0	0	0	0	0	0	0	0	0	0
ERR3200813	1	M	MSM	Urethra	United States	New York	NA	NA	0	0	0	0	0	0	0	0	1	0	0	0
ERR3200814	1	M	MSW/WSM	Urethra	United States	New York	NA	NA	0	0	0	0	0	0	0	0	0	0	0	0
ERR3200815	1	M	MSM	Rectum	United States	New York	NA	NA	0	0	0	0	0	0	0	0	1	0	0	0
ERR3200816	1	NA	NA	NA	United States	New York	NA	NA	0	0	0	0	0	0	0	0	1	0	0	0
ERR3200817	1	M	MSM	Urethra	United States	New York	NA	NA	0	0	0	0	0	0	0	0	0	0	0	0
ERR3200818	1	M	NA	Urethra	United States	New York	NA	NA	0	0	0	0	0	0	0	0	0	0	0	0
ERR3200819	1	M	MSW/WSM	Urethra	United States	New York	NA	NA	0	0	0	0	0	0	0	0	0	0	0	0
ERR3200821	1	M	MSM	Urethra	United States	New York	NA	NA	0	0	0	0	0	0	0	1	0	0	0	0
ERR3200822	1	M	MSM	Rectum	United States	New York	NA	NA	0	0	0	0	0	0	0	0	0	0	0	0
ERR3200824	1	M	MSM	Pharynx	United States	New York	NA	NA	0	0	0	0	0	0	0	0	1	0	0	0
ERR3200825	1	M	MSM	Urethra	United States	New York	NA	NA	0	0	0	0	0	0	0	0	0	0	0	0
ERR3200826	1	M	MSW/WSM	Urethra	United States	New York	NA	NA	0	0	0	0	0	0	0	0	0	0	0	0
ERR3200827	1	M	MSW/WSM	Urethra	United States	New York	NA	NA	0	0	0	0	0	0	0	0	0	0	0	0
ERR3200828	1	M	MSM	Urethra	United States	New York	NA	NA	0	0	0	0	0	0	0	0	0	0	0	0
ERR3200829	1	M	MSW/WSM	Urethra	United States	New York	NA	NA	0	0	0	0	0	0	0	0	0	0	0	0
ERR3200830	1	M	MSM	Urethra	United States	New York	NA	NA	0	0	0	0	0	0	0	0	1	0	0	0
ERR3200831	1	M	MSM	Urethra	United States	New York	NA	NA	0	0	1	0	0	0	0	1	1	0	0	0
ERR3200832	1	M	NA	Urethra	United States	New York	NA	NA	0	0	1	0	0	0	0	1	1	0	0	0
ERR3200833	1	M	MSM	Urethra	United States	New York	NA	NA	0	0	0	0	0	0	0	0	0	0	0	0
ERR3200834	1	M	MSM	Urethra	United States	New York	NA	NA	0	0	0	0	0	0	0	0	0	0	0	0
ERR3200835	1	M	MSM	Urethra	United States	New York	NA	NA	0	0	0	0	0	0	0	1	1	0	0	0
ERR3200836	1	M	MSM	Urethra	United States	New York	NA	NA	0	0	0	0	0	0	0	1	0	0	0	0
ERR3200837	1	M	MSM	Urethra	United States	New York	NA	NA	0	0	1	0	0	0	0	1	1	0	0	0
ERR3200838	1	M	MSM	Rectum	United States	New York	NA	NA	0	0	0	0	0	0	0	0	1	0	0	0
ERR3200839	1	M	MSM	Rectum	United States	New York	NA	NA	0	0	0	0	0	0	0	0	0	0	0	0
ERR3200840	1	M	MSM	Urethra	United States	New York	NA	NA	1	0	0	0	0	0	0	0	0	0	0	0
ERR3200841	1	M	NA	Urethra	United States	New York	NA	NA	0	0	0	0	0	0	0	0	0	0	0	0
ERR3200842	1	M	MSM	Urethra	United States	New York	NA	NA	0	0	0	0	0	0	0	0	0	0	0	0
ERR3200843	1	M	MSM	Urethra	United States	New York	NA	NA	0	0	0	0	0	0	0	0	0	NA	NA	NA
ERR3200844	1	M	MSM	Urethra	United States	New York	NA	NA	1	0	0	0	0	0	0	0	0	0	0	0
ERR3200845	1	M	MSM	Urethra	United States	New York	NA	NA	0	0	0	0	0	0	0	0	0	0	0	0
ERR3200846	1	M	MSM	Urethra	United States	New York	NA	NA	0	0	0	0	0	0	0	0	1	0	0	0
ERR3200847	1	M	MSM	Urethra	United States	New York	NA	NA	0	0	0	0	0	0	0	1	1	0	0	0
ERR3200848	1	M	MSM	Urethra	United States	New York	NA	NA	0	0	0	0	0	0	0	0	0	0	0	0
ERR3200849	1	M	MSM	Urethra	United States	New York	NA	NA	0	0	0	0	0	0	0	0	1	0	0	0
ERR3200850	1	NA	NA	NA	United States	New York	NA	NA	0	0	0	0	0	0	0	1	1	0	0	0
ERR3200851	1	M	MSM	Urethra	United States	New York	NA	NA	0	0	0	0	0	0	0	0	1	0	0	0
ERR3200852	1	M	MSW/WSM	Urethra	United States	New York	NA	NA	0	0	0	0	0	0	0	0	0	0	0	0
ERR3200853	1	M	MSM	Urethra	United States	New York	NA	NA	0	0	0	0	0	0	0	0	1	0	0	0
ERR3200854	1	M	MSM	Urethra	United States	New York	NA	NA	0	0	0	0	0	0	0	1	1	0	0	0
ERR3200855	1	M	MSM	Rectum	United States	New York	NA	NA	0	0	0	0	0	0	0	0	1	0	0	0
ERR3200856	1	M	MSW/WSM	Urethra	United States	New York	NA	NA	1	0	0	0	0	0	0	0	1	0	0	0
ERR3200857	1	M	MSW/WSM	Urethra	United States	New York	NA	NA	0	0	0	0	0	0	0	1	0	0	0	0
ERR3200858	1	M	MSM	Urethra	United States	New York	NA	NA	0	0	0	0	0	0	0	0	0	0	0	0
ERR3200859	1	M	MSM	Urethra	United States	New York	NA	NA	0	0	0	0	0	0	0	1	0	0	0	0
ERR3200860	1	M	MSM	Urethra	United States	New York	NA	NA	0	0	0	0	0	0	0	1	0	0	0	0
ERR3200861	1	M	MSM	Urethra	United States	New York	NA	NA	1	0	0	0	0	0	0	0	1	0	0	0
ERR3200862	1	M	MSM	Rectum	United States	New York	NA	NA	0	0	0	0	0	0	0	0	1	0	0	0
ERR3200863	1	M	MSM	Urethra	United States	New York	NA	NA	0	0	0	0	0	0	0	1	1	0	0	0
ERR3200864	1	M	MSM	Urethra	United States	New York	NA	NA	0	0	0	0	0	0	0	1	1	0	0	0
ERR3200865	1	M	MSM	Urethra	United States	New York	NA	NA	1	0	0	0	0	0	0	0	0	0	0	0
ERR3200866	1	M	MSW/WSM	Urethra	United States	New York	NA	NA	1	0	0	0	0	0	0	0	0	0	0	0
ERR3200867	1	M	MSM	Urethra	United States	New York	NA	NA	0	0	0	0	0	0	0	0	1	0	0	0
ERR3200868	1	M	MSW/WSM	Urethra	United States	New York	NA	NA	0	0	0	0	0	0	0	0	0	0	0	0
ERR3200869	1	M	MSM	Urethra	United States	New York	NA	NA	0	0	0	0	0	0	0	1	1	0	0	0
ERR3200870	1	M	MSM	Urethra	United States	New York	NA	NA	0	0	0	0	0	0	0	0	0	0	0	0
ERR3200871	1	M	MSM	Urethra	United States	New York	NA	NA	1	0	0	0	0	0	0	0	0	0	0	NA
ERR3200872	1	M	NA	Urethra	United States	New York	NA	NA	0	0	0	0	0	0	0	0	0	0	0	0
ERR3200873	1	M	MSW/WSM	Urethra	United States	New York	NA	NA	0	0	0	0	0	0	0	0	1	0	0	0
ERR3200874	1	M	NA	Rectum	United States	New York	NA	NA	0	0	0	0	0	0	0	0	0	0	0	0
ERR3200875	1	M	MSM	Urethra	United States	New York	NA	NA	0	0	0	0	0	0	0	0	0	0	0	0
ERR3200876	1	M	MSM	Urethra	United States	New York	NA	NA	0	0	0	0	0	0	0	0	1	0	0	0
ERR3200877	1	M	MSM	Rectum	United States	New York	NA	NA	0	0	0	0	0	0	0	0	1	0	0	0
ERR3200878	1	M	MSW/WSM	Urethra	United States	New York	NA	NA	0	0	0	0	0	0	0	0	0	0	0	0
ERR3200879	1	M	MSM	Urethra	United States	New York	NA	NA	0	0	0	0	0	0	0	0	1	0	0	0
ERR3200880	1	M	MSM	Urethra	United States	New York	NA	NA	0	0	0	0	0	0	0	0	1	0	0	0
ERR3200881	1	W	MSW/WSM	Cervix	United States	New York	NA	NA	0	0	0	0	0	0	0	0	0	1	0	0
ERR3200882	1	M	MSW/WSM	Urethra	United States	New York	NA	NA	1	0	0	0	0	0	0	0	0	0	0	0
ERR3200883	1	NA	NA	NA	United States	New York	NA	NA	1	0	0	0	0	0	0	0	0	0	0	0
ERR3200884	1	M	MSM	Urethra	United States	New York	NA	NA	1	0	0	0	0	0	0	0	1	0	0	0
ERR3200885	1	M	MSW/WSM	Urethra	United States	New York	NA	NA	0	0	0	0	0	0	0	0	0	0	0	0
ERR3200886	1	M	MSM	Urethra	United States	New York	NA	NA	0	0	0	0	0	0	0	0	0	0	0	0
ERR3200888	1	M	MSM	Urethra	United States	New York	NA	NA	0	0	0	0	0	0	0	0	1	0	0	0
ERR3200889	1	M	MSM	Urethra	United States	New York	NA	NA	0	0	0	0	0	0	0	1	0	0	0	0
ERR3200890	1	M	NA	Rectum	United States	New York	NA	NA	0	0	0	0	0	0	0	0	0	0	0	0
ERR3200891	1	M	MSW/WSM	Urethra	United States	New York	NA	NA	1	0	0	0	0	0	0	0	0	0	0	0
ERR3200892	1	W	MSW/WSM	Cervix	United States	New York	NA	NA	0	0	0	0	0	0	0	0	0	0	0	0
ERR3200893	1	M	MSW/WSM	Urethra	United States	New York	NA	NA	0	0	0	0	0	0	0	0	0	0	0	0
ERR3200894	1	W	MSW/WSM	Cervix	United States	New York	NA	NA	0	0	0	0	0	0	0	1	0	0	0	0
ERR3200895	1	W	MSW/WSM	Pharynx	United States	New York	NA	NA	0	0	0	0	0	0	0	1	0	0	0	0
ERR3200896	1	W	NA	Pharynx	United States	New York	NA	NA	0	0	0	0	0	0	0	1	0	0	0	0
ERR3200897	1	M	MSW/WSM	Urethra	United States	New York	NA	NA	0	0	0	0	0	0	0	0	0	0	0	0
ERR3200898	1	M	MSM	Urethra	United States	New York	NA	NA	0	0	0	0	0	0	0	0	1	0	0	0
ERR3200899	1	M	MSW/WSM	Urethra	United States	New York	NA	NA	0	0	0	0	0	0	0	0	0	0	0	0
ERR3200901	1	M	MSW/WSM	Urethra	United States	New York	NA	NA	0	0	0	0	0	0	0	0	0	0	0	0
ERR3200902	1	M	MSW/WSM	Urethra	United States	New York	NA	NA	0	0	0	0	0	0	0	0	0	0	0	0
ERR3200903	1	M	MSM	Rectum	United States	New York	NA	NA	0	0	0	0	0	0	0	0	0	0	0	0
ERR3200904	1	M	MSW/WSM	Urethra	United States	New York	NA	NA	0	0	0	0	0	0	0	0	0	0	0	0
ERR3200905	1	M	MSW/WSM	Urethra	United States	New York	NA	NA	0	0	0	0	0	0	0	0	0	0	0	0
ERR3200906	1	M	MSM	Urethra	United States	New York	NA	NA	1	0	0	0	0	0	0	0	0	0	0	0
ERR3200907	1	M	MSW/WSM	Urethra	United States	New York	NA	NA	0	0	0	0	0	0	0	0	0	0	0	0
ERR3200908	1	M	MSM	Rectum	United States	New York	NA	NA	0	0	0	0	0	0	0	0	0	0	0	0
ERR3200909	1	M	MSM	Urethra	United States	New York	NA	NA	0	0	0	0	0	0	0	0	0	0	0	0
ERR3200910	1	M	MSM	Urethra	United States	New York	NA	NA	0	0	0	0	0	0	0	1	1	0	0	0
ERR3200911	1	M	MSM	Urethra	United States	New York	NA	NA	0	0	0	0	0	0	0	0	1	0	0	0
ERR3200912	1	M	MSW/WSM	Urethra	United States	New York	NA	NA	0	0	0	0	0	0	0	0	1	0	0	0
ERR3200913	1	M	MSW/WSM	Urethra	United States	New York	NA	NA	0	0	0	0	0	0	0	0	0	0	0	0
ERR3200914	1	M	MSM	Urethra	United States	New York	NA	NA	0	0	0	0	0	0	0	1	1	0	0	0
ERR3200915	1	M	MSW/WSM	Urethra	United States	New York	NA	NA	0	0	0	0	0	0	0	0	0	0	0	0
ERR3200916	1	M	MSM	Urethra	United States	New York	NA	NA	0	0	0	0	0	0	0	0	1	0	0	0
ERR3200917	1	M	MSW/WSM	Urethra	United States	New York	NA	NA	0	0	0	0	0	0	0	1	1	0	0	0
ERR3200918	1	M	MSM	Urethra	United States	New York	NA	NA	0	0	0	0	0	0	0	1	1	0	0	0
ERR3200919	1	M	MSW/WSM	Urethra	United States	New York	NA	NA	0	0	0	0	0	0	0	0	1	0	0	0
ERR3200920	1	M	MSW/WSM	Urethra	United States	New York	NA	NA	0	0	0	0	0	0	0	0	0	0	0	0
ERR3200921	1	M	MSM	Urethra	United States	New York	NA	NA	0	0	0	0	0	0	0	0	1	0	0	0
ERR3200922	1	M	MSM	Urethra	United States	New York	NA	NA	0	0	0	0	0	0	0	0	1	0	0	0
ERR3200923	1	M	MSM	Urethra	United States	New York	NA	NA	0	0	0	0	0	0	0	0	1	0	0	0
ERR3200924	1	M	MSM	Urethra	United States	New York	NA	NA	0	0	0	0	0	0	0	0	1	0	0	0
ERR3200925	1	M	MSW/WSM	Urethra	United States	New York	NA	NA	0	0	0	0	0	0	0	0	0	0	0	0
ERR3200926	1	M	MSM	Urethra	United States	New York	NA	NA	0	0	0	0	0	0	0	1	0	0	0	0
ERR3200927	1	M	MSW/WSM	Urethra	United States	New York	NA	NA	0	0	0	0	0	0	0	0	0	0	0	0
ERR3200928	1	M	MSM	Pharynx	United States	New York	NA	NA	0	0	0	0	0	0	0	0	0	0	0	0
ERR3200929	1	M	MSM	Urethra	United States	New York	NA	NA	0	0	0	0	0	0	0	0	0	0	0	0
ERR3200930	1	M	MSM	Urethra	United States	New York	NA	NA	0	0	0	0	0	0	0	0	1	0	0	0
ERR3200931	1	M	MSM	Urethra	United States	New York	NA	NA	0	0	0	0	0	0	0	0	0	0	0	0
ERR3200932	1	M	MSM	Rectum	United States	New York	NA	NA	0	0	0	0	0	0	0	0	1	0	0	0
ERR3200933	1	M	MSM	Urethra	United States	New York	NA	NA	0	0	0	0	0	0	0	0	1	0	0	0
ERR3200934	1	M	MSM	Urethra	United States	New York	NA	NA	0	0	0	0	0	0	0	0	1	0	0	0
ERR3200935	1	M	MSM	Urethra	United States	New York	NA	NA	0	0	0	0	0	0	0	1	1	0	0	0
ERR3200936	1	M	NA	Urethra	United States	New York	NA	NA	0	0	0	0	0	0	0	0	0	0	0	0
ERR3200937	1	M	MSM	Urethra	United States	New York	NA	NA	0	0	0	0	0	0	0	1	1	0	0	0
ERR3200938	1	M	MSM	Rectum	United States	New York	NA	NA	0	0	0	0	0	0	0	0	1	0	0	0
ERR3200939	1	M	MSM	Urethra	United States	New York	NA	NA	1	0	0	0	0	0	0	0	0	0	0	0
ERR3200940	1	M	MSM	Urethra	United States	New York	NA	NA	0	0	0	0	0	0	0	0	1	0	0	0
ERR3200941	1	M	MSM	Urethra	United States	New York	NA	NA	0	0	0	0	0	0	0	0	0	0	0	0
ERR3200942	1	M	MSM	Urethra	United States	New York	NA	NA	0	0	0	0	0	0	0	0	1	0	0	0
ERR3200943	1	M	MSM	Urethra	United States	New York	NA	NA	0	0	0	0	0	0	0	0	0	0	0	0
ERR3200944	1	M	MSM	Urethra	United States	New York	NA	NA	0	0	0	0	0	0	0	0	1	0	0	0
ERR3200945	1	M	MSM	Urethra	United States	New York	NA	NA	0	0	0	0	0	0	0	0	0	0	0	0
ERR3200946	1	M	MSM	Urethra	United States	New York	NA	NA	0	0	0	0	0	0	0	0	0	0	0	0
ERR3200947	1	M	MSM	Urethra	United States	New York	NA	NA	1	0	0	0	0	0	0	0	0	0	0	0
ERR3200948	1	M	MSM	Urethra	United States	New York	NA	NA	0	0	0	0	0	0	0	1	1	0	0	0
ERR3200949	1	M	MSM	Urethra	United States	New York	NA	NA	0	0	0	0	0	0	0	0	1	0	0	0
ERR3200951	1	M	MSM	Urethra	United States	New York	NA	NA	0	0	0	0	0	0	0	1	0	0	0	0
ERR3200952	1	M	MSM	Urethra	United States	New York	NA	NA	0	0	0	0	0	0	0	0	0	0	0	0
ERR3200954	1	M	MSW/WSM	Urethra	United States	New York	NA	NA	0	0	0	0	0	0	0	0	0	0	0	0
ERR3200955	1	M	MSM	Urethra	United States	New York	NA	NA	0	0	0	0	0	0	0	0	0	0	0	0
ERR3200956	1	M	MSW/WSM	Urethra	United States	New York	NA	NA	1	0	0	0	0	0	0	0	0	0	0	0
ERR3200957	1	M	MSM	Urethra	United States	New York	NA	NA	0	0	0	0	0	0	0	1	1	0	0	0
ERR3200958	1	M	MSM	Urethra	United States	New York	NA	NA	1	0	0	0	0	0	0	0	0	0	0	0
ERR3200959	1	M	MSW/WSM	Urethra	United States	New York	NA	NA	0	0	0	0	0	0	0	0	0	0	0	0
ERR3200960	1	M	MSM	Urethra	United States	New York	NA	NA	0	0	0	0	0	0	0	0	0	0	0	0
ERR3200961	1	M	MSM	Urethra	United States	New York	NA	NA	0	0	0	0	0	0	0	1	1	0	0	0
ERR3200962	1	M	MSM	Urethra	United States	New York	NA	NA	1	0	0	0	0	0	0	0	0	0	0	0
ERR3200964	1	M	MSM	Rectum	United States	New York	NA	NA	0	0	0	0	0	0	0	0	0	0	0	0
ERR3200965	1	M	MSM	Rectum	United States	New York	NA	NA	0	0	0	0	0	0	0	0	1	0	0	0
ERR3200966	1	M	MSM	Urethra	United States	New York	NA	NA	0	0	0	0	0	0	0	0	1	0	0	0
ERR3200967	1	M	MSM	Urethra	United States	New York	NA	NA	0	0	1	0	0	0	0	1	1	0	0	0
ERR3200968	1	M	MSM	Urethra	United States	New York	NA	NA	0	0	0	0	0	0	0	0	0	0	0	0
ERR3200969	1	M	MSM	Urethra	United States	New York	NA	NA	0	0	0	0	0	0	0	0	0	0	0	0
ERR3200970	1	M	MSM	Urethra	United States	New York	NA	NA	0	0	0	0	0	0	0	1	1	0	0	0
ERR3200971	1	M	NA	Urethra	United States	New York	NA	NA	1	0	0	0	0	0	0	0	1	0	0	0
ERR3200972	1	M	MSM	Urethra	United States	New York	NA	NA	1	0	0	0	0	0	0	0	0	0	0	0
ERR3200973	1	M	MSM	Urethra	United States	New York	NA	NA	0	0	0	0	0	0	0	0	0	0	0	0
ERR3200974	1	M	MSM	Urethra	United States	New York	NA	NA	0	0	0	0	0	0	0	0	1	0	0	0
ERR3200975	1	M	MSM	Urethra	United States	New York	NA	NA	0	0	0	0	0	0	0	0	1	0	0	0
ERR3200976	1	M	MSM	Urethra	United States	New York	NA	NA	0	0	0	0	0	0	0	1	0	0	0	0
ERR3200977	1	M	MSM	Urethra	United States	New York	NA	NA	0	0	0	0	0	0	0	0	0	0	0	0
ERR3200978	1	M	MSM	Urethra	United States	New York	NA	NA	0	0	0	0	0	0	0	0	0	0	0	0
ERR3200979	1	M	MSM	Urethra	United States	New York	NA	NA	0	0	0	0	0	0	0	0	0	0	0	0
ERR3200980	1	M	MSW/WSM	Urethra	United States	New York	NA	NA	1	0	0	0	0	0	0	0	0	0	0	0
ERR3200981	1	M	MSM	Rectum	United States	New York	NA	NA	0	0	0	0	0	0	0	0	1	0	0	0
ERR3200982	1	M	NA	Urethra	United States	New York	NA	NA	1	0	0	0	0	0	0	0	0	0	0	0
ERR3200983	1	M	MSM	Urethra	United States	New York	NA	NA	0	0	0	0	0	0	0	1	1	0	0	0
ERR3200984	1	M	MSM	Urethra	United States	New York	NA	NA	0	0	0	0	0	0	0	0	0	0	0	0
ERR3200985	1	M	MSM	Urethra	United States	New York	NA	NA	0	0	0	0	0	0	0	0	1	0	0	0
ERR3200986	1	M	MSM	Urethra	United States	New York	NA	NA	0	0	0	0	0	0	0	0	0	0	0	0
ERR3200987	1	M	NA	Urethra	United States	New York	NA	NA	0	0	0	0	0	0	0	0	0	0	0	0
ERR3200988	1	M	MSM	Urethra	United States	New York	NA	NA	0	0	0	0	0	0	0	0	0	0	0	0
ERR3200989	1	M	MSM	Rectum	United States	New York	NA	NA	0	0	0	0	0	0	0	0	0	0	0	0
ERR3200990	1	M	MSM	Urethra	United States	New York	NA	NA	0	0	1	0	0	0	0	1	1	0	0	0
ERR3200991	1	M	MSM	Urethra	United States	New York	NA	NA	0	0	0	0	0	0	0	0	1	0	0	0
ERR3200992	1	NA	NA	NA	United States	New York	NA	NA	0	0	0	0	0	0	0	0	0	0	0	0
ERR3200993	1	M	MSM	Urethra	United States	New York	NA	NA	0	0	0	0	0	0	0	0	1	0	0	0
ERR3200994	1	M	MSM	Urethra	United States	New York	NA	NA	0	0	0	0	0	0	0	0	0	0	0	0
ERR3200995	1	M	MSM	Urethra	United States	New York	NA	NA	0	0	0	0	0	0	0	1	0	0	0	0
ERR3200996	1	M	MSM	Urethra	United States	New York	NA	NA	0	0	0	0	0	0	0	0	0	0	0	0
ERR3200997	1	M	MSM	Urethra	United States	New York	NA	NA	0	0	0	0	0	0	0	0	0	0	0	0
ERR3200998	1	M	MSM	Urethra	United States	New York	NA	NA	1	0	0	0	0	0	0	0	0	0	0	0
ERR3200999	1	M	MSM	Urethra	United States	New York	NA	NA	0	0	0	0	0	0	0	0	1	0	0	1
ERR3201000	1	M	MSM	Urethra	United States	New York	NA	NA	0	0	0	0	0	0	0	0	1	0	0	0
ERR3201001	1	M	MSM	Pharynx	United States	New York	NA	NA	0	0	0	0	0	0	0	0	0	0	0	0
ERR3201002	1	M	MSM	Rectum	United States	New York	NA	NA	0	0	0	0	0	0	0	0	0	0	0	0
ERR3201003	1	M	MSM	Urethra	United States	New York	NA	NA	0	0	1	0	0	0	0	1	1	0	0	0
ERR3201004	1	M	MSM	Urethra	United States	New York	NA	NA	0	0	0	0	0	0	0	0	0	0	0	0
ERR3201005	1	M	MSM	Rectum	United States	New York	NA	NA	0	0	0	0	0	0	0	0	1	0	0	0
ERR3201006	1	M	MSM	Urethra	United States	New York	NA	NA	0	0	0	0	0	0	0	0	1	0	0	0
ERR3201007	1	M	MSM	Urethra	United States	New York	NA	NA	0	0	0	0	0	0	0	0	1	0	0	0
ERR3201008	1	M	MSM	Urethra	United States	New York	NA	NA	0	0	0	0	0	0	0	0	1	0	0	0
ERR3201009	1	NA	NA	NA	United States	New York	NA	NA	0	0	0	0	0	0	0	1	1	0	0	0
ERR3201010	1	M	MSM	Urethra	United States	New York	NA	NA	0	0	0	0	0	0	0	0	1	0	0	0
ERR3201011	1	M	MSM	Urethra	United States	New York	NA	NA	0	0	0	0	0	0	0	1	1	0	0	0
ERR3201012	1	M	MSW/WSM	Urethra	United States	New York	NA	NA	0	0	0	0	0	0	0	0	0	NA	NA	NA
ERR3201013	1	M	MSM	Urethra	United States	New York	NA	NA	0	0	0	0	0	0	0	0	0	0	0	0
ERR3201014	1	M	MSM	Urethra	United States	New York	NA	NA	0	0	0	0	0	0	0	0	0	NA	NA	NA
ERR3201015	1	M	MSM	Urethra	United States	New York	NA	NA	0	0	0	0	0	0	0	0	1	NA	NA	NA
ERR3201016	1	M	MSM	Urethra	United States	New York	NA	NA	0	0	0	0	0	0	0	0	0	NA	NA	NA
ERR3201017	1	M	MSW/WSM	Urethra	United States	New York	NA	NA	0	0	0	0	0	0	0	0	0	0	0	0
ERR3201018	1	M	MSW/WSM	Urethra	United States	New York	NA	NA	0	0	0	0	0	0	0	0	0	0	0	0
ERR3201019	1	M	MSM	Urethra	United States	New York	NA	NA	0	0	0	0	0	0	0	0	1	0	0	0
ERR3201020	1	M	MSM	Urethra	United States	New York	NA	NA	0	0	0	0	0	0	0	0	0	0	0	0
ERR3201021	1	M	MSM	Urethra	United States	New York	NA	NA	0	0	0	0	0	0	0	0	1	0	0	0
ERR3201022	1	M	MSM	Urethra	United States	New York	NA	NA	0	0	0	0	0	0	0	0	1	0	0	0
ERR3201023	1	M	MSM	Rectum	United States	New York	NA	NA	0	0	1	0	0	0	0	1	1	0	0	0
ERR3201024	1	M	MSM	Urethra	United States	New York	NA	NA	0	0	0	0	0	0	0	0	1	0	0	0
ERR3201025	1	M	MSM	Urethra	United States	New York	NA	NA	0	0	0	0	0	0	0	0	0	0	0	0
ERR3201026	1	M	MSM	Urethra	United States	New York	NA	NA	0	0	0	0	0	0	0	0	1	0	0	0
ERR3201027	1	M	MSM	Rectum	United States	New York	NA	NA	0	0	1	0	0	0	0	1	0	0	0	0
ERR3201028	1	M	MSW/WSM	Urethra	United States	New York	NA	NA	0	0	0	0	0	0	0	0	1	0	0	0
ERR3201029	1	M	MSM	Urethra	United States	New York	NA	NA	0	0	0	0	0	0	0	0	0	0	0	0
ERR3201030	1	M	MSM	Urethra	United States	New York	NA	NA	0	0	0	0	0	0	0	0	1	0	0	0
ERR3201031	1	M	MSM	Rectum	United States	New York	NA	NA	0	0	0	0	0	0	0	0	1	0	0	0
ERR3201032	1	M	MSM	Urethra	United States	New York	NA	NA	0	0	0	0	0	0	0	0	1	0	0	0
ERR3201033	1	M	MSM	Urethra	United States	New York	NA	NA	0	0	0	0	0	0	0	1	0	0	0	0
ERR3201034	1	M	MSM	Urethra	United States	New York	NA	NA	0	0	0	0	0	0	0	0	0	0	0	0
ERR3201035	1	M	MSM	Rectum	United States	New York	NA	NA	0	0	0	0	0	0	0	1	0	0	0	0
ERR3201036	1	M	MSM	Rectum	United States	New York	NA	NA	0	0	0	0	0	0	0	0	1	0	0	0
ERR3201037	1	M	MSM	Urethra	United States	New York	NA	NA	0	0	1	0	0	0	0	1	1	0	0	0
ERR3201038	1	M	MSW/WSM	Urethra	United States	New York	NA	NA	0	0	0	0	0	0	0	0	0	0	0	NA
ERR3201039	1	M	MSM	Urethra	United States	New York	NA	NA	0	0	0	0	0	0	0	1	1	0	0	0
ERR3201040	1	M	MSM	Urethra	United States	New York	NA	NA	1	0	0	0	0	0	0	0	0	0	0	0
ERR3201041	1	M	MSM	Urethra	United States	New York	NA	NA	0	0	0	0	0	0	0	0	0	0	0	0
ERR3201042	1	M	MSM	Rectum	United States	New York	NA	NA	0	0	1	0	0	0	0	1	1	0	0	0
ERR3201043	1	M	MSM	Urethra	United States	New York	NA	NA	0	0	0	0	0	0	0	0	0	0	0	0
ERR3201044	1	M	MSM	Urethra	United States	New York	NA	NA	0	0	0	0	0	0	0	0	1	0	0	0
ERR3201045	1	M	MSM	Urethra	United States	New York	NA	NA	0	0	0	0	0	0	0	0	0	0	0	0
ERR3201046	1	M	MSM	Urethra	United States	New York	NA	NA	0	0	0	0	0	0	0	0	0	0	0	0
ERR3201047	1	M	MSM	Urethra	United States	New York	NA	NA	0	0	0	0	0	0	0	0	1	0	0	0
ERR3201048	1	M	NA	Urethra	United States	New York	NA	NA	0	0	0	0	0	0	0	0	1	0	0	0
ERR3201049	1	M	NA	Urethra	United States	New York	NA	NA	0	0	0	0	0	0	0	0	0	0	0	0
ERR3201050	1	M	MSM	Urethra	United States	New York	NA	NA	0	0	0	0	0	0	0	0	0	0	0	0
ERR3201051	1	M	MSW/WSM	Urethra	United States	New York	NA	NA	0	0	0	0	0	0	0	1	1	0	0	0
ERR3201052	1	M	MSM	Urethra	United States	New York	NA	NA	0	0	0	0	0	0	0	1	1	1	0	0
ERR3201053	1	M	MSM	Urethra	United States	New York	NA	NA	0	0	1	0	0	0	0	1	1	0	0	0
ERR3201054	1	M	MSM	Urethra	United States	New York	NA	NA	0	0	0	0	0	0	0	0	0	0	0	0
ERR3201055	1	M	MSM	Urethra	United States	New York	NA	NA	0	0	0	0	0	0	0	0	1	0	0	0
ERR3201056	1	M	MSM	Urethra	United States	New York	NA	NA	0	0	1	0	0	0	0	1	1	0	0	0
ERR3201057	1	M	MSM	Urethra	United States	New York	NA	NA	0	0	0	0	0	0	0	0	1	0	0	0
ERR3201058	1	M	MSM	Rectum	United States	New York	NA	NA	0	0	0	0	0	0	0	0	0	0	0	0
ERR3201059	1	M	MSM	Rectum	United States	New York	NA	NA	0	0	0	0	0	0	0	0	1	0	0	0
ERR3201060	1	M	MSM	Urethra	United States	New York	NA	NA	0	0	0	0	0	0	0	0	1	0	0	0
ERR3201061	1	M	MSM	Urethra	United States	New York	NA	NA	0	0	0	0	0	0	0	0	0	NA	0	0
ERR3201062	1	M	MSM	Urethra	United States	New York	NA	NA	0	0	0	0	0	0	0	0	1	0	0	0
ERR3201063	1	M	MSM	Rectum	United States	New York	NA	NA	0	0	0	0	0	0	0	1	0	0	0	0
ERR3201064	1	M	MSM	Urethra	United States	New York	NA	NA	0	0	0	0	0	0	0	0	1	0	0	0
ERR3201065	1	M	MSW/WSM	Urethra	United States	New York	NA	NA	0	0	0	0	0	0	0	0	0	0	0	0
ERR3201066	1	M	MSM	Urethra	United States	New York	NA	NA	0	0	0	0	0	0	0	0	0	0	0	0
ERR3201067	1	M	MSW/WSM	Urethra	United States	New York	NA	NA	0	0	0	0	0	0	0	0	0	0	0	0
ERR3201068	1	M	MSM	Urethra	United States	New York	NA	NA	0	0	0	0	0	0	0	0	0	0	0	0
ERR3201069	1	M	MSM	Urethra	United States	New York	NA	NA	0	0	0	0	0	0	0	1	0	0	0	0
ERR3201070	1	M	MSW/WSM	Urethra	United States	New York	NA	NA	0	0	0	0	0	0	0	0	0	0	0	0
ERR3201071	1	M	MSM	Urethra	United States	New York	NA	NA	0	0	0	0	0	0	0	0	1	0	0	0
ERR3201072	1	M	MSW/WSM	Urethra	United States	New York	NA	NA	1	0	0	0	0	0	0	0	0	0	0	0
ERR3201073	1	M	MSW/WSM	Urethra	United States	New York	NA	NA	0	0	0	0	0	0	0	0	1	0	0	0
ERR3201074	1	M	NA	Urethra	United States	New York	NA	NA	0	0	0	0	0	0	0	0	1	0	0	0
ERR3201075	1	M	MSM	Urethra	United States	New York	NA	NA	1	0	0	0	0	0	0	0	0	0	0	0
ERR3201076	1	M	MSM	Urethra	United States	New York	NA	NA	0	0	0	0	0	0	0	1	1	0	0	0
ERR3201077	1	M	MSM	Rectum	United States	New York	NA	NA	0	0	0	0	0	0	0	0	1	0	0	0
ERR3201078	1	M	MSW/WSM	Urethra	United States	New York	NA	NA	0	0	0	0	0	0	0	0	0	0	0	0
ERR3201079	1	M	NA	Urethra	United States	New York	NA	NA	0	0	0	0	0	0	0	0	0	0	0	0
ERR3201080	1	M	MSM	Urethra	United States	New York	NA	NA	0	0	0	0	0	0	0	0	0	0	0	0
ERR3201081	1	M	MSM	Urethra	United States	New York	NA	NA	0	0	0	0	1	0	0	0	1	0	0	0
ERR3201082	1	M	MSW/WSM	Urethra	United States	New York	NA	NA	0	0	0	0	0	0	0	0	1	0	0	0
ERR3201083	1	M	MSM	Urethra	United States	New York	NA	NA	0	0	0	0	0	0	0	0	1	0	0	0
ERR3201084	1	M	MSM	Rectum	United States	New York	NA	NA	0	0	0	0	0	0	0	1	0	0	0	0
ERR3201085	1	M	MSM	Urethra	United States	New York	NA	NA	0	0	0	0	0	0	0	1	0	0	0	0
ERR3201086	1	M	MSM	Urethra	United States	New York	NA	NA	0	0	0	0	0	0	0	0	0	0	0	0
ERR3201087	1	M	MSM	Urethra	United States	New York	NA	NA	0	0	0	0	0	0	0	0	0	0	0	0
ERR3201088	1	M	MSM	Urethra	United States	New York	NA	NA	0	0	0	0	0	0	0	0	1	0	0	0
ERR3201089	1	M	MSM	Urethra	United States	New York	NA	NA	0	0	0	0	0	0	0	1	1	0	0	0
ERR3201090	1	M	NA	Urethra	United States	New York	NA	NA	0	0	0	0	0	0	0	0	0	0	0	0
ERR3201091	1	M	MSM	Urethra	United States	New York	NA	NA	0	0	0	0	0	0	0	0	1	0	0	0
ERR3201092	1	M	MSM	Urethra	United States	New York	NA	NA	0	0	0	0	0	0	0	0	1	0	0	0
ERR3201093	1	M	MSM	Urethra	United States	New York	NA	NA	0	0	0	0	0	0	0	1	0	0	0	0
ERR3201094	1	M	MSM	Urethra	United States	New York	NA	NA	0	0	0	0	0	0	0	1	0	0	0	0
ERR3201095	1	M	MSM	Urethra	United States	New York	NA	NA	0	0	0	0	0	0	0	0	1	0	0	0
ERR3201096	1	M	MSM	Rectum	United States	New York	NA	NA	0	0	1	0	0	0	0	1	1	0	0	0
ERR3201097	1	M	MSM	Pharynx	United States	New York	NA	NA	0	0	0	0	0	0	0	0	0	0	0	0
ERR3201098	1	M	NA	Urethra	United States	New York	NA	NA	0	0	0	0	0	0	0	0	0	0	0	0
ERR3201099	1	M	MSM	Urethra	United States	New York	NA	NA	0	0	0	0	0	0	0	0	1	0	0	0
ERR3201100	1	M	MSM	Rectum	United States	New York	NA	NA	0	0	0	0	0	0	0	0	1	0	0	0
ERR3201101	1	M	MSM	Rectum	United States	New York	NA	NA	0	0	0	0	0	0	0	0	0	0	0	0
ERR3201102	1	M	MSM	Rectum	United States	New York	NA	NA	0	0	0	0	0	0	0	0	1	0	0	0
ERR3201103	1	NA	NA	Pharynx	United States	New York	NA	NA	0	0	0	0	0	0	0	0	0	0	0	0
ERR3201104	1	M	MSM	Urethra	United States	New York	NA	NA	0	0	0	0	0	0	0	0	0	0	0	0
ERR3201105	1	M	MSM	Urethra	United States	New York	NA	NA	1	0	0	0	0	0	0	0	0	0	0	0
ERR3201106	1	M	MSW/WSM	Urethra	United States	New York	NA	NA	0	0	0	0	0	0	0	0	0	0	0	0
ERR3201107	1	M	MSW/WSM	Urethra	United States	New York	NA	NA	0	0	1	0	0	0	0	1	1	0	0	0
ERR3201108	1	M	MSW/WSM	Urethra	United States	New York	NA	NA	0	0	0	0	0	0	0	0	0	0	0	0
ERR3201109	1	M	MSM	Urethra	United States	New York	NA	NA	0	0	1	0	0	0	0	1	1	0	0	0
ERR3201110	1	M	MSM	Urethra	United States	New York	NA	NA	0	0	1	0	0	0	0	1	1	1	0	0
ERR3201111	1	M	NA	Urethra	United States	New York	NA	NA	0	0	0	0	0	0	0	0	1	0	0	0
ERR3201112	1	W	MSW/WSM	Cervix	United States	New York	NA	NA	0	0	0	0	0	0	0	0	0	0	0	0
ERR3201113	1	NA	NA	NA	United States	New York	NA	NA	0	0	1	0	0	0	0	1	1	0	0	0
ERR3201114	1	M	MSM	Urethra	United States	New York	NA	NA	0	0	0	0	0	0	0	0	0	0	0	0
ERR3201115	1	M	MSM	Rectum	United States	New York	NA	NA	0	0	0	0	0	0	0	1	1	0	0	0
ERR3201116	1	M	MSW/WSM	Urethra	United States	New York	NA	NA	0	0	0	0	0	0	0	0	0	0	0	NA
ERR3201117	1	M	MSM	Urethra	United States	New York	NA	NA	0	0	0	0	0	0	0	1	1	0	0	0
ERR3201118	1	M	MSW/WSM	Urethra	United States	New York	NA	NA	0	0	0	0	0	0	0	0	0	0	0	0
ERR3201119	1	M	MSM	Urethra	United States	New York	NA	NA	0	0	0	0	0	0	0	0	0	0	0	0
ERR3201120	1	M	NA	Urethra	United States	New York	NA	NA	0	0	0	0	0	0	0	0	0	0	0	0
ERR3201121	1	W	MSW/WSM	Cervix	United States	New York	NA	NA	0	0	0	0	0	0	0	0	0	0	0	0
ERR3201122	1	M	MSM	Urethra	United States	New York	NA	NA	0	0	0	0	0	0	0	0	1	0	0	0
ERR3201123	1	M	MSM	Urethra	United States	New York	NA	NA	0	0	0	0	0	0	0	1	0	0	0	0
ERR3201124	1	M	MSM	Rectum	United States	New York	NA	NA	0	0	0	0	0	0	0	0	1	0	0	0
ERR3201125	1	M	MSM	Rectum	United States	New York	NA	NA	0	0	0	0	0	0	0	0	0	0	0	0
ERR3201126	1	M	MSM	Urethra	United States	New York	NA	NA	0	0	0	0	0	0	0	0	0	0	0	0
ERR3201127	1	M	MSM	Rectum	United States	New York	NA	NA	0	0	0	0	0	0	0	0	0	0	0	0
ERR3201128	1	M	MSM	Urethra	United States	New York	NA	NA	0	0	0	0	0	0	0	0	0	0	0	0
ERR3201129	1	M	MSM	Urethra	United States	New York	NA	NA	0	0	0	0	0	0	0	0	1	0	0	0
ERR3201130	1	M	MSM	Rectum	United States	New York	NA	NA	0	0	0	0	0	0	0	0	1	0	0	0
ERR3201131	1	M	MSM	Urethra	United States	New York	NA	NA	1	0	0	0	0	0	0	0	0	0	0	0
ERR3201132	1	M	MSM	Urethra	United States	New York	NA	NA	0	0	0	0	0	0	0	0	1	0	0	0
ERR3201133	1	M	MSM	Rectum	United States	New York	NA	NA	0	0	0	0	0	0	0	0	0	0	0	0
ERR3201134	1	M	MSM	Pharynx	United States	New York	NA	NA	0	0	0	0	0	0	0	1	1	0	0	0
ERR3201135	1	M	MSM	Urethra	United States	New York	NA	NA	0	0	0	0	0	0	0	0	1	0	0	0
ERR3201136	1	M	MSM	Urethra	United States	New York	NA	NA	0	0	0	0	0	0	0	0	0	0	0	0
ERR3201137	1	M	MSM	Rectum	United States	New York	NA	NA	0	0	0	0	0	0	0	1	1	0	0	0
ERR3201138	1	M	MSM	Urethra	United States	New York	NA	NA	0	0	0	0	0	0	0	0	1	0	0	0
ERR3201139	1	M	MSM	Urethra	United States	New York	NA	NA	0	0	0	0	0	0	0	0	1	0	0	0
ERR3201140	1	M	MSM	Urethra	United States	New York	NA	NA	0	0	0	0	0	0	0	0	1	0	0	0
ERR3201141	1	M	MSM	Urethra	United States	New York	NA	NA	0	0	0	0	0	0	0	0	0	0	0	0
ERR3201142	1	M	MSM	Urethra	United States	New York	NA	NA	1	0	0	0	0	0	0	0	0	0	0	0
ERR3201143	1	M	MSM	Rectum	United States	New York	NA	NA	0	0	0	0	0	0	0	0	0	0	0	0
ERR3201144	1	M	NA	Urethra	United States	New York	NA	NA	0	0	0	0	0	0	0	0	0	0	0	0
ERR3201145	1	M	MSM	Rectum	United States	New York	NA	NA	0	0	0	0	0	0	0	0	0	0	0	0
ERR3201146	1	M	MSM	Urethra	United States	New York	NA	NA	0	0	0	0	0	0	0	1	1	0	0	0
ERR3201147	1	M	MSM	Urethra	United States	New York	NA	NA	1	0	0	0	0	0	0	0	0	0	0	0
ERR3201148	1	M	MSM	Urethra	United States	New York	NA	NA	0	0	0	0	0	0	0	0	1	0	0	0
ERR3201149	1	M	MSM	Rectum	United States	New York	NA	NA	0	0	0	0	0	0	0	0	1	0	0	0
ERR3201150	1	W	MSW/WSM	Cervix	United States	New York	NA	NA	0	0	0	0	0	0	0	0	1	0	0	0
ERR3201151	1	W	MSW/WSM	Cervix	United States	New York	NA	NA	0	0	0	0	0	0	0	0	1	0	0	0
ERR3201152	1	M	MSM	Rectum	United States	New York	NA	NA	0	0	0	0	0	0	0	0	0	0	0	0
ERR3201153	1	M	MSM	Urethra	United States	New York	NA	NA	0	0	0	0	0	0	0	0	1	0	0	0
ERR3201154	1	W	MSW/WSM	Cervix	United States	New York	NA	NA	0	0	0	0	0	0	0	0	0	0	0	0
ERR3201155	1	M	MSW/WSM	Urethra	United States	New York	NA	NA	0	0	0	0	0	0	0	0	1	0	0	0
ERR3201156	1	W	MSW/WSM	Cervix	United States	New York	NA	NA	0	0	1	0	0	0	0	1	1	0	0	0
ERR3201157	1	M	MSM	Urethra	United States	New York	NA	NA	0	0	0	0	0	0	0	1	1	0	0	0
ERR3201158	1	M	NA	Urethra	United States	New York	NA	NA	0	0	0	0	0	0	0	0	0	0	0	0
ERR3201159	1	M	MSM	Urethra	United States	New York	NA	NA	0	0	0	0	0	0	0	0	1	0	0	0
ERR3201160	1	M	MSM	Urethra	United States	New York	NA	NA	0	0	0	0	0	0	0	1	1	0	0	0
ERR3201161	1	M	MSM	Urethra	United States	New York	NA	NA	0	0	0	0	0	0	0	0	0	0	0	0
ERR3201162	1	M	MSW/WSM	Urethra	United States	New York	NA	NA	0	0	0	0	0	0	0	0	0	0	0	0
ERR3201163	1	M	MSM	Urethra	United States	New York	NA	NA	0	0	0	0	0	0	0	0	0	0	0	0
ERR3201164	1	M	MSM	Rectum	United States	New York	NA	NA	0	0	0	0	0	0	0	1	0	0	0	0
ERR3201165	1	M	MSM	Urethra	United States	New York	NA	NA	0	0	0	0	0	0	0	0	1	0	0	0
ERR3201166	1	M	MSM	Urethra	United States	New York	NA	NA	0	0	1	0	0	0	0	1	1	0	0	0
ERR3201167	1	M	MSM	Rectum	United States	New York	NA	NA	0	0	0	0	0	0	0	0	0	0	0	0
ERR3201168	1	M	MSM	Urethra	United States	New York	NA	NA	1	0	0	0	0	0	0	0	0	0	0	0
ERR3201169	1	M	MSM	Urethra	United States	New York	NA	NA	0	0	0	0	0	0	0	0	1	0	0	0
ERR3201170	1	M	MSM	Urethra	United States	New York	NA	NA	0	0	0	0	0	0	0	0	0	0	0	0
ERR3201171	1	M	MSM	Rectum	United States	New York	NA	NA	0	0	0	0	0	0	0	0	0	0	0	0
ERR3201172	1	M	MSM	Urethra	United States	New York	NA	NA	0	0	0	0	0	0	0	0	1	0	0	0
ERR3201173	1	M	NA	Urethra	United States	New York	NA	NA	0	0	0	0	0	0	0	0	0	0	0	0
ERR3201174	1	M	MSM	Urethra	United States	New York	NA	NA	0	0	0	0	0	0	0	1	1	0	0	0
ERR3201175	1	M	MSW/WSM	Urethra	United States	New York	NA	NA	0	0	0	0	0	0	0	1	0	0	0	0
ERR3201176	1	W	MSW/WSM	Cervix	United States	New York	NA	NA	0	0	0	0	0	0	0	0	1	0	0	0
ERR3201177	1	M	MSM	Rectum	United States	New York	NA	NA	0	0	0	0	0	0	0	1	1	0	0	0
ERR3201178	1	M	MSM	Urethra	United States	New York	NA	NA	0	0	0	0	0	0	0	1	1	0	0	0
ERR3201179	1	M	MSM	Urethra	United States	New York	NA	NA	1	0	0	0	0	0	0	0	0	0	0	0
ERR3201180	1	M	MSM	Urethra	United States	New York	NA	NA	0	0	0	0	0	0	0	0	1	0	0	0
ERR3201181	1	M	MSM	Rectum	United States	New York	NA	NA	0	0	0	0	0	0	0	1	1	0	0	0
ERR3201182	1	M	MSM	Rectum	United States	New York	NA	NA	0	0	0	0	0	0	0	1	1	0	0	0
ERR3201183	1	W	MSW/WSM	Cervix	United States	New York	NA	NA	0	0	0	0	0	0	0	0	0	0	0	0
ERR3201184	1	M	MSM	Urethra	United States	New York	NA	NA	0	0	0	0	0	0	0	0	0	0	0	0
ERR3201185	1	M	NA	Urethra	United States	New York	NA	NA	0	0	0	0	0	0	0	0	1	0	0	0
ERR3201186	1	M	NA	Urethra	United States	New York	NA	NA	1	0	0	0	0	0	0	0	0	0	0	0
ERR3201187	1	M	MSM	Pharynx	United States	New York	NA	NA	0	0	0	0	0	0	0	0	1	0	0	0
ERR3201188	1	M	MSM	Urethra	United States	New York	NA	NA	0	0	0	0	0	0	0	1	0	0	0	0
ERR3201189	1	M	MSM	Urethra	United States	New York	NA	NA	0	0	0	0	0	0	0	1	1	0	0	NA
ERR3201190	1	M	MSM	Urethra	United States	New York	NA	NA	0	0	0	0	0	0	0	0	1	0	0	0
ERR3201191	1	M	MSM	Urethra	United States	New York	NA	NA	0	0	0	0	0	0	0	0	1	0	0	0
ERR3201192	1	M	NA	Urethra	United States	New York	NA	NA	1	0	0	0	0	0	0	0	0	0	0	0
ERR3201193	1	M	NA	Urethra	United States	New York	NA	NA	0	0	0	0	0	0	0	1	1	0	0	0
ERR3201194	1	M	MSM	Urethra	United States	New York	NA	NA	0	0	0	0	0	0	0	0	1	0	0	0
ERR3201195	1	M	MSW/WSM	Urethra	United States	New York	NA	NA	0	0	0	0	0	0	0	0	0	0	0	0
ERR3201196	1	M	MSW/WSM	Urethra	United States	New York	NA	NA	1	0	0	0	0	0	0	0	0	0	0	0
ERR3201197	1	W	MSW/WSM	Cervix	United States	New York	NA	NA	1	0	0	0	0	0	0	0	0	0	0	0
ERR3201198	1	M	NA	Urethra	United States	New York	NA	NA	0	0	1	0	0	0	0	1	1	1	0	0
ERR3201199	1	NA	NA	NA	United States	New York	NA	NA	0	0	0	0	0	0	0	0	0	0	0	0
ERR3201200	1	W	MSW/WSM	Cervix	United States	New York	NA	NA	1	0	0	0	0	0	0	0	0	0	0	0
ERR3201201	1	M	MSM	Urethra	United States	New York	NA	NA	0	0	0	0	0	0	0	0	1	0	0	0
ERR3201202	1	M	MSM	Urethra	United States	New York	NA	NA	0	0	0	0	0	0	0	0	0	0	0	0
ERR3201203	1	M	MSW/WSM	Urethra	United States	New York	NA	NA	0	0	0	0	0	0	0	0	0	0	0	0
ERR3201204	1	M	MSM	Urethra	United States	New York	NA	NA	0	0	0	0	0	0	0	1	1	0	0	0
ERR3201205	1	M	MSM	Urethra	United States	New York	NA	NA	0	0	0	0	0	0	0	0	0	0	0	0
ERR3201206	1	M	MSM	Urethra	United States	New York	NA	NA	0	0	0	0	0	0	0	1	0	NA	0	0
ERR3201207	1	M	MSW/WSM	Urethra	United States	New York	NA	NA	0	0	0	0	0	0	0	0	0	0	0	0
ERR3201208	1	W	MSW/WSM	Cervix	United States	New York	NA	NA	0	0	0	0	0	0	0	0	0	0	0	0
ERR3201209	1	M	MSM	Urethra	United States	New York	NA	NA	0	0	0	0	0	0	0	0	0	0	0	0
ERR3201210	1	M	MSM	Rectum	United States	New York	NA	NA	0	0	0	0	0	0	0	0	0	0	0	0
ERR3201211	1	M	MSM	Urethra	United States	New York	NA	NA	0	0	0	0	0	0	0	0	0	0	0	0
ERR3201212	1	M	MSM	Urethra	United States	New York	NA	NA	0	0	0	0	0	0	0	0	0	0	0	0
ERR3201213	1	M	MSM	Urethra	United States	New York	NA	NA	0	0	0	0	0	0	0	0	0	0	0	0
ERR3201214	1	M	MSM	Urethra	United States	New York	NA	NA	0	0	0	0	0	0	0	0	0	0	0	0
ERR3201215	1	M	MSM	Urethra	United States	New York	NA	NA	0	0	0	0	0	0	0	1	1	0	0	0
ERR3201216	1	M	MSM	Rectum	United States	New York	NA	NA	0	0	0	0	0	0	0	1	1	0	0	NA
ERR3201217	1	M	NA	Urethra	United States	New York	NA	NA	0	0	0	0	0	0	0	0	0	0	0	0
ERR3201218	1	M	MSM	Urethra	United States	New York	NA	NA	0	0	0	0	0	0	0	1	0	0	0	0
ERR3201219	1	M	NA	Urethra	United States	New York	NA	NA	0	0	0	0	0	0	0	0	0	0	0	0
ERR3201220	1	M	MSM	Rectum	United States	New York	NA	NA	0	0	0	0	0	0	0	1	1	0	0	0
ERR3201221	1	M	MSM	Urethra	United States	New York	NA	NA	0	0	0	0	0	0	0	0	0	0	0	0
ERR3201222	1	M	MSM	Urethra	United States	New York	NA	NA	0	0	1	0	0	0	0	1	1	0	0	0
ERR3201223	1	M	MSW/WSM	Urethra	United States	New York	NA	NA	0	0	0	0	0	0	0	0	0	0	0	0
ERR3201224	1	M	MSW/WSM	Urethra	United States	New York	NA	NA	0	0	0	0	0	0	0	0	1	0	0	0
ERR3201225	1	M	MSM	Rectum	United States	New York	NA	NA	0	0	0	0	0	0	0	0	0	0	0	0
ERR3201226	1	M	MSM	Urethra	United States	New York	NA	NA	0	0	0	0	0	0	0	1	1	0	0	0
ERR3201227	1	W	MSW/WSM	Cervix	United States	New York	NA	NA	0	0	0	0	0	0	0	0	0	0	0	0
ERR3201228	1	W	MSW/WSM	Cervix	United States	New York	NA	NA	1	0	0	0	0	0	0	0	0	0	0	0
ERR3201229	1	M	MSM	Urethra	United States	New York	NA	NA	0	0	1	0	0	0	0	1	1	0	0	0
ERR3201230	1	M	MSM	Urethra	United States	New York	NA	NA	0	0	0	0	0	0	0	0	1	0	0	0
ERR3201231	1	M	MSW/WSM	Urethra	United States	New York	NA	NA	0	0	0	0	0	0	0	0	0	0	0	0
ERR3201232	1	M	MSM	Urethra	United States	New York	NA	NA	0	0	0	0	0	0	0	0	1	0	0	0
ERR3201233	1	M	MSW/WSM	Urethra	United States	New York	NA	NA	1	0	0	0	0	0	0	0	0	0	0	0
ERR3201234	1	M	MSW/WSM	Urethra	United States	New York	NA	NA	0	0	0	0	0	0	0	0	1	0	0	0
ERR3201235	1	M	MSW/WSM	Urethra	United States	New York	NA	NA	1	0	0	0	0	0	0	0	0	0	0	0
ERR3201236	1	NA	NA	NA	United States	New York	NA	NA	0	0	0	0	0	0	0	0	0	0	0	0
ERR3201237	1	NA	NA	NA	United States	New York	NA	NA	1	0	0	0	0	0	0	0	0	0	0	0
ERR3201238	1	NA	NA	NA	United States	New York	NA	NA	1	0	0	0	0	0	0	0	0	0	0	0
ERR3201239	1	M	MSW/WSM	Urethra	United States	New York	NA	NA	0	0	0	0	0	0	0	1	1	0	0	0
ERR3201240	1	M	MSW/WSM	Urethra	United States	New York	NA	NA	0	0	0	0	0	0	0	1	1	0	0	0
ERR3201241	1	M	MSM	Urethra	United States	New York	NA	NA	0	0	0	0	0	0	0	1	1	0	0	0
ERR3201242	1	M	NA	Urethra	United States	New York	NA	NA	0	0	0	0	0	0	0	0	0	0	0	0
ERR3201243	1	M	MSW/WSM	Urethra	United States	New York	NA	NA	0	0	0	0	0	0	0	0	0	0	0	0
ERR3201244	1	M	MSW/WSM	Urethra	United States	New York	NA	NA	0	0	0	0	0	0	0	0	0	0	0	0
ERR3201245	1	M	MSW/WSM	Urethra	United States	New York	NA	NA	1	0	0	0	0	0	0	0	0	0	0	0
ERR3201246	1	M	MSW/WSM	Urethra	United States	New York	NA	NA	0	0	0	0	0	0	0	1	1	0	0	0
ERR3201247	1	M	MSW/WSM	Urethra	United States	New York	NA	NA	0	0	0	0	0	0	0	0	1	0	0	0
ERR3201248	1	M	MSW/WSM	Urethra	United States	New York	NA	NA	0	0	1	0	0	0	0	1	1	0	0	0
ERR3201249	1	M	MSM	Rectum	United States	New York	NA	NA	0	0	0	0	0	0	0	0	1	0	0	0
ERR3201250	1	M	MSM	Pharynx	United States	New York	NA	NA	0	0	0	0	0	0	0	0	1	0	0	0
ERR3201251	1	M	MSM	Urethra	United States	New York	NA	NA	0	0	0	0	0	0	0	0	0	0	0	0
ERR3201252	1	M	MSM	Urethra	United States	New York	NA	NA	1	0	0	0	0	0	0	0	0	0	0	0
ERR3201253	1	M	MSM	Urethra	United States	New York	NA	NA	0	0	0	0	0	0	0	1	1	0	0	0
ERR3201254	1	M	MSM	Urethra	United States	New York	NA	NA	0	0	0	0	0	0	0	1	1	0	0	0
ERR3201255	1	M	NA	Urethra	United States	New York	NA	NA	0	0	1	0	0	0	0	1	1	1	0	0
ERR3201257	1	M	MSM	Rectum	United States	New York	NA	NA	0	0	0	0	0	0	0	0	1	0	0	0
ERR3201258	1	M	MSM	Urethra	United States	New York	NA	NA	0	0	0	0	0	0	0	0	0	0	0	0
ERR3201259	1	M	MSM	Urethra	United States	New York	NA	NA	0	0	0	0	0	0	0	0	0	0	0	0
ERR3201260	1	M	MSM	Urethra	United States	New York	NA	NA	0	0	0	0	0	0	0	0	0	0	0	0
ERR3201261	1	M	MSM	Rectum	United States	New York	NA	NA	0	0	0	0	0	0	0	1	1	0	0	0
ERR3201262	1	NA	NA	NA	United States	New York	NA	NA	0	0	0	0	0	0	0	1	0	0	0	0
ERR3201263	1	M	MSM	Rectum	United States	New York	NA	NA	0	0	1	0	0	0	0	1	1	0	0	0
ERR3201264	1	M	MSM	Urethra	United States	New York	NA	NA	0	0	0	0	0	0	0	0	0	0	0	0
ERR3201265	1	M	MSM	Urethra	United States	New York	NA	NA	0	0	0	0	0	0	0	0	1	0	0	0
ERR3201266	1	W	MSW/WSM	Cervix	United States	New York	NA	NA	0	0	0	0	0	0	0	0	0	0	0	0
ERR3201267	1	M	NA	Urethra	United States	New York	NA	NA	1	0	0	0	0	0	0	0	0	0	0	0
ERR3201268	1	M	MSM	Urethra	United States	New York	NA	NA	0	0	0	0	0	0	0	0	1	0	0	0
ERR3201269	1	M	MSW/WSM	Urethra	United States	New York	NA	NA	0	0	0	0	0	0	0	0	1	0	0	0
ERR3201270	1	M	MSW/WSM	Urethra	United States	New York	NA	NA	0	0	0	0	0	0	0	0	1	0	0	0
ERR3201271	1	M	MSW/WSM	Urethra	United States	New York	NA	NA	0	0	0	0	0	0	0	0	1	0	0	0
ERR3201272	1	M	MSM	Urethra	United States	New York	NA	NA	1	0	0	0	0	0	0	0	1	0	0	0
ERR3201273	1	M	MSM	Urethra	United States	New York	NA	NA	0	0	0	0	0	0	0	1	0	0	0	0
ERR3201274	1	M	MSM	Rectum	United States	New York	NA	NA	1	0	0	0	0	0	0	0	1	0	0	0
ERR3201275	1	M	MSM	Urethra	United States	New York	NA	NA	0	0	0	0	0	0	0	0	0	0	0	0
ERR3201276	1	M	MSM	Urethra	United States	New York	NA	NA	0	0	0	0	0	0	0	0	1	0	0	0
ERR3201277	1	M	MSM	Urethra	United States	New York	NA	NA	0	0	0	0	0	0	0	0	1	0	0	0
ERR3201279	1	M	MSM	Urethra	United States	New York	NA	NA	0	0	0	0	0	0	0	0	1	0	0	0
ERR3201280	1	M	MSW/WSM	Urethra	United States	New York	NA	NA	0	0	0	0	0	0	0	0	1	0	0	0
ERR3201281	1	M	MSM	Urethra	United States	New York	NA	NA	0	0	0	0	0	0	0	0	0	0	0	0
ERR3201282	1	M	MSM	Rectum	United States	New York	NA	NA	0	0	0	0	0	0	0	1	1	0	0	0
ERR3201283	1	M	MSM	Urethra	United States	New York	NA	NA	0	0	0	0	0	0	0	0	0	0	0	0
ERR3201284	1	M	MSM	Urethra	United States	New York	NA	NA	0	0	0	0	0	0	0	0	0	0	0	0
ERR3201285	1	M	MSM	Urethra	United States	New York	NA	NA	0	0	0	0	0	0	0	0	1	0	0	0
ERR3201286	1	M	MSM	Urethra	United States	New York	NA	NA	0	0	0	0	0	0	0	1	1	0	0	NA
ERR3201287	1	M	MSM	Urethra	United States	New York	NA	NA	0	0	0	0	0	0	0	1	1	0	0	0
ERR3201288	1	M	MSW/WSM	Urethra	United States	New York	NA	NA	0	0	0	0	0	0	0	0	0	0	0	0
ERR3201289	1	M	MSM	Urethra	United States	New York	NA	NA	0	0	0	0	0	0	0	0	1	0	0	0
ERR3201290	1	M	MSM	Urethra	United States	New York	NA	NA	0	0	0	0	0	0	0	0	0	0	0	0
ERR3201291	1	M	MSM	Urethra	United States	New York	NA	NA	1	0	0	0	0	0	0	0	1	0	0	0
ERR3201292	1	M	MSM	Urethra	United States	New York	NA	NA	0	0	0	0	0	0	0	0	0	0	0	0
ERR3201293	1	M	MSM	Urethra	United States	New York	NA	NA	0	0	0	0	0	0	0	0	0	0	0	0
ERR3201294	1	M	MSM	Urethra	United States	New York	NA	NA	0	0	1	0	0	0	0	1	1	0	0	0
ERR3201295	1	M	MSM	Rectum	United States	New York	NA	NA	0	0	0	0	0	0	0	0	1	0	0	0
ERR3201296	1	M	MSM	Urethra	United States	New York	NA	NA	0	0	0	0	0	0	0	0	0	0	0	0
ERR3201297	1	M	MSM	Urethra	United States	New York	NA	NA	0	0	0	0	0	0	0	1	1	0	0	0
ERR3201298	1	M	MSM	Urethra	United States	New York	NA	NA	1	0	0	0	0	0	0	0	0	0	0	0
ERR3201299	1	M	MSM	Urethra	United States	New York	NA	NA	0	0	0	0	0	0	0	0	0	0	0	0
ERR3201300	1	M	MSM	Urethra	United States	New York	NA	NA	0	0	0	0	0	0	0	0	0	0	0	0
ERR3201301	1	M	MSM	Urethra	United States	New York	NA	NA	0	0	0	0	0	0	0	0	1	0	0	0
ERR3201302	1	M	NA	Urethra	United States	New York	NA	NA	0	0	0	0	0	0	0	0	0	0	0	0
ERR3201303	1	M	MSW/WSM	Urethra	United States	New York	NA	NA	0	0	0	0	0	0	0	0	1	0	0	0
ERR3201304	1	M	MSM	Urethra	United States	New York	NA	NA	0	0	0	0	0	0	0	1	1	0	0	0
ERR3201305	1	M	MSM	Rectum	United States	New York	NA	NA	0	0	0	0	0	0	0	0	0	0	0	0
ERR3201306	1	M	MSW/WSM	Urethra	United States	New York	NA	NA	0	0	0	0	0	0	0	0	0	0	0	0
ERR3201307	1	M	MSM	Urethra	United States	New York	NA	NA	0	0	0	0	0	0	0	1	1	1	0	0
ERR3201308	1	M	MSM	Urethra	United States	New York	NA	NA	0	0	0	0	0	0	0	0	1	0	0	0
ERR3201309	1	M	MSW/WSM	Urethra	United States	New York	NA	NA	0	0	0	0	0	0	0	0	0	0	0	0
ERR3201310	1	M	MSW/WSM	Urethra	United States	New York	NA	NA	0	0	0	0	0	0	0	0	1	0	0	0
ERR3201311	1	M	MSW/WSM	Urethra	United States	New York	NA	NA	0	0	0	0	0	0	0	0	1	0	0	0
ERR3201312	1	M	MSW/WSM	Urethra	United States	New York	NA	NA	0	0	0	0	0	0	0	0	1	0	0	0
ERR3201313	1	M	MSW/WSM	Urethra	United States	New York	NA	NA	0	0	0	0	0	0	0	0	0	0	0	0
ERR3201314	1	W	MSW/WSM	Cervix	United States	New York	NA	NA	0	0	0	0	0	0	0	0	0	0	0	0
ERR3201315	1	M	MSW/WSM	Urethra	United States	New York	NA	NA	0	0	0	0	0	0	0	0	0	0	0	0
ERR3201316	1	M	MSW/WSM	Urethra	United States	New York	NA	NA	1	0	0	0	0	0	0	0	1	0	0	0
ERR3201317	1	M	MSW/WSM	Urethra	United States	New York	NA	NA	0	0	0	0	0	0	0	0	0	0	0	0
ERR3201318	1	M	MSW/WSM	Urethra	United States	New York	NA	NA	0	0	0	0	0	0	0	0	0	0	0	0
ERR3201319	1	M	MSM	Urethra	United States	New York	NA	NA	0	0	0	0	0	0	0	0	1	0	0	0
ERR3201320	1	M	MSM	Urethra	United States	New York	NA	NA	0	0	0	0	0	0	0	0	1	0	0	0
ERR3201321	1	M	MSM	Urethra	United States	New York	NA	NA	0	0	0	0	0	0	0	1	1	0	0	0
ERR3201322	1	M	MSW/WSM	Urethra	United States	New York	NA	NA	0	0	0	0	0	0	0	0	0	0	0	0
ERR3201323	1	M	MSM	Urethra	United States	New York	NA	NA	0	0	0	0	0	0	0	0	1	0	0	0
ERR3201324	1	M	MSW/WSM	Urethra	United States	New York	NA	NA	0	0	0	0	0	0	0	0	1	0	0	0
ERR3201325	1	M	MSM	Urethra	United States	New York	NA	NA	0	0	0	0	0	0	0	0	0	0	0	0
ERR3201326	1	M	MSM	Rectum	United States	New York	NA	NA	1	0	0	0	0	0	0	0	0	0	0	0
ERR3201327	1	M	MSM	Urethra	United States	New York	NA	NA	0	0	0	0	0	0	0	0	0	0	0	0
ERR3201328	1	M	MSM	Rectum	United States	New York	NA	NA	0	0	0	0	0	0	0	0	1	0	0	0
ERR3201329	1	M	MSM	Urethra	United States	New York	NA	NA	0	0	0	0	0	0	0	0	0	0	0	0
ERR3201330	1	M	MSW/WSM	Urethra	United States	New York	NA	NA	0	0	0	0	0	0	0	0	0	0	0	0
ERR3201331	1	M	MSM	Urethra	United States	New York	NA	NA	0	0	0	0	0	0	0	1	0	0	0	0
ERR3201332	1	M	MSM	Rectum	United States	New York	NA	NA	0	0	0	0	0	0	0	0	0	0	0	0
ERR3201333	1	W	MSW/WSM	Rectum	United States	New York	NA	NA	0	0	0	0	0	0	0	0	1	0	0	0
ERR3201334	1	M	MSM	Urethra	United States	New York	NA	NA	0	0	0	0	0	0	0	0	1	0	0	0
ERR3201335	1	M	MSM	Urethra	United States	New York	NA	NA	0	0	0	0	0	0	0	1	1	0	0	0
ERR3201336	1	NA	NA	NA	United States	New York	NA	NA	0	0	0	0	0	0	0	0	0	0	0	0
ERR3201337	1	NA	NA	NA	United States	New York	NA	NA	0	0	0	0	0	0	0	0	1	0	0	0
ERR3201338	1	M	MSM	Rectum	United States	New York	NA	NA	0	0	0	0	0	0	0	0	0	0	0	0
ERR3201339	1	M	MSW/WSM	Urethra	United States	New York	NA	NA	0	0	0	0	0	0	0	0	1	0	0	0
ERR3201340	1	M	MSM	Urethra	United States	New York	NA	NA	0	0	1	0	0	0	0	1	1	0	0	0
ERR3201341	1	M	MSM	Urethra	United States	New York	NA	NA	0	0	1	0	0	0	0	1	1	0	0	0
ERR3201342	1	W	MSW/WSM	Cervix	United States	New York	NA	NA	1	0	0	0	0	0	0	0	0	0	0	0
ERR3201343	1	W	MSW/WSM	Cervix	United States	New York	NA	NA	0	0	0	0	0	0	0	0	1	0	0	0
ERR3201344	1	M	MSM	Urethra	United States	New York	NA	NA	0	0	0	0	0	0	0	0	0	0	0	0
ERR3201345	1	M	MSM	Rectum	United States	New York	NA	NA	0	0	1	0	0	0	0	1	1	0	0	0
ERR3201346	1	M	MSW/WSM	Urethra	United States	New York	NA	NA	0	0	0	0	0	0	0	0	0	0	0	0
ERR3201347	1	M	MSM	Pharynx	United States	New York	NA	NA	0	0	0	0	0	0	0	0	0	0	0	0
ERR3201348	1	M	MSM	Urethra	United States	New York	NA	NA	0	0	0	0	0	0	0	0	1	0	0	0
ERR3201349	1	M	MSM	Urethra	United States	New York	NA	NA	0	0	0	0	0	0	0	0	1	0	0	0
ERR3201350	1	M	MSM	Rectum	United States	New York	NA	NA	0	0	0	0	0	0	0	1	1	0	0	0
ERR3201351	1	M	MSM	Urethra	United States	New York	NA	NA	0	0	0	0	0	0	0	0	1	0	0	0
ERR3201352	1	W	NA	Cervix	United States	New York	NA	NA	0	0	0	0	0	0	0	1	0	0	0	0
ERR3201353	1	M	MSM	Rectum	United States	New York	NA	NA	0	0	1	0	0	0	0	1	1	0	0	0
ERR3201354	1	M	MSM	Urethra	United States	New York	NA	NA	0	0	0	0	0	0	0	1	1	0	0	0
ERR3201355	1	M	MSM	Urethra	United States	New York	NA	NA	0	0	0	0	0	0	0	0	0	0	0	0
ERR3201356	1	M	NA	Pharynx	United States	New York	NA	NA	0	0	0	0	0	0	0	0	0	0	0	0
ERR3201357	1	M	MSM	Urethra	United States	New York	NA	NA	0	0	0	0	0	0	0	0	1	0	0	0
ERR3201358	1	M	MSM	Urethra	United States	New York	NA	NA	0	0	0	0	0	0	0	1	1	0	0	0
ERR3201359	1	M	NA	Urethra	United States	New York	NA	NA	0	0	1	0	0	0	0	1	1	1	0	0
ERR3201360	1	M	MSM	Urethra	United States	New York	NA	NA	0	0	0	0	0	0	0	1	1	0	0	0
ERR3201361	1	M	MSW/WSM	Urethra	United States	New York	NA	NA	0	0	0	0	0	0	0	0	0	0	0	0
ERR3201362	1	M	MSM	Urethra	United States	New York	NA	NA	0	0	0	0	0	0	0	0	0	0	0	0
ERR3201363	1	M	MSW/WSM	Urethra	United States	New York	NA	NA	0	0	0	0	0	0	0	0	0	0	0	0
ERR3201364	1	M	MSM	Urethra	United States	New York	NA	NA	0	0	0	0	0	0	0	0	0	0	0	0
ERR3201365	1	M	MSM	Urethra	United States	New York	NA	NA	0	0	0	0	0	0	0	1	1	0	0	0
ERR3201366	1	M	MSM	Urethra	United States	New York	NA	NA	0	0	0	0	0	0	0	0	0	0	0	0
ERR3201367	1	M	MSW/WSM	Urethra	United States	New York	NA	NA	1	0	0	0	0	0	0	0	0	0	0	0
ERR3201369	1	M	MSW/WSM	Urethra	United States	New York	NA	NA	0	0	0	0	0	0	0	0	0	0	0	NA
ERR3201370	1	M	MSW/WSM	Urethra	United States	New York	NA	NA	0	0	1	0	0	0	0	1	0	0	0	NA
ERR3201371	1	W	MSW/WSM	Cervix	United States	New York	NA	NA	0	0	0	0	0	0	0	0	1	0	0	NA
ERR3201372	1	M	MSW/WSM	Urethra	United States	New York	NA	NA	0	0	1	0	0	0	0	1	1	0	0	NA
ERR3201373	1	M	MSM	Rectum	United States	New York	NA	NA	0	0	0	0	0	0	0	0	1	0	0	0
ERR3201374	1	M	MSM	Urethra	United States	New York	NA	NA	0	0	0	0	0	0	0	0	1	0	0	0
SRR8559169	2	M	MSM	Rectum	Australia	Victoria	No	No	0	0	0	0	0	0	0	1	1	0	NA	0
SRR8559170	2	M	MSW/WSM	Urethra	Australia	Victoria	No	NA	0	0	0	0	0	0	0	0	0	0	NA	0
SRR8559171	2	W	MSW/WSM	Cervix	Australia	Victoria	No	NA	0	0	0	0	0	0	0	0	1	0	NA	0
SRR8559172	2	M	MSM	Urethra	Australia	Victoria	No	No	0	0	0	0	0	0	0	0	1	0	NA	1
SRR8559173	2	M	MSM	Rectum	Australia	Victoria	No	No	0	0	0	0	0	0	0	0	0	0	NA	0
SRR8559174	2	M	MSM	Rectum	Australia	Victoria	No	No	0	0	0	0	0	0	0	0	1	0	NA	1
SRR8559175	2	M	MSW/WSM	Urethra	Australia	Victoria	No	No	0	0	0	0	0	0	0	1	0	0	NA	0
SRR8559176	2	W	MSW/WSM	Pharynx	Australia	Victoria	No	Yes	0	0	0	0	0	0	0	1	0	0	NA	0
SRR8559177	2	M	MSM	Urethra	Australia	Victoria	No	No	0	0	0	0	0	0	0	1	NA	0	NA	0
SRR8559178	2	M	MSM	Pharynx	Australia	Victoria	No	No	0	0	0	0	0	0	0	0	0	0	NA	0
SRR8559179	2	M	MSM	Urethra	Australia	Victoria	No	No	0	0	0	0	0	0	0	1	NA	0	NA	0
SRR8559180	2	M	MSM	Pharynx	Australia	Victoria	No	No	0	0	0	0	0	0	0	1	NA	0	NA	0
SRR8559181	2	M	MSM	Urethra	Australia	Victoria	Yes	No	0	0	0	0	0	0	0	1	0	0	NA	0
SRR8559182	2	M	MSM	Urethra	Australia	Victoria	No	No	0	0	0	0	0	0	0	1	NA	0	NA	0
SRR8559183	2	M	MSM	Pharynx	Australia	Victoria	No	No	0	0	0	0	0	0	0	0	1	0	NA	0
SRR8559184	2	M	MSW/WSM	Urethra	Australia	Victoria	No	No	0	0	0	0	0	0	0	0	0	0	NA	0
SRR8559185	2	M	MSM	Urethra	Australia	Victoria	No	No	0	0	0	0	0	0	0	0	1	0	NA	1
SRR8559186	2	M	MSM	Urethra	Australia	Victoria	No	No	0	0	0	0	0	0	0	0	1	0	NA	0
SRR8559187	2	M	MSM	Urethra	Australia	Victoria	No	No	0	0	0	0	0	0	0	0	0	0	NA	0
SRR8559188	2	M	MSM	Rectum	Australia	Victoria	No	No	0	0	0	0	0	0	0	1	NA	0	NA	0
SRR8559189	2	W	MSW/WSM	Cervix	Australia	Victoria	NA	NA	0	0	0	0	0	0	0	0	0	0	NA	0
SRR8559190	2	M	NA	Urethra	Australia	Victoria	NA	No	0	0	0	0	0	0	0	0	0	0	NA	0
SRR8559191	2	M	NA	Rectum	Australia	Victoria	NA	NA	0	0	0	0	0	0	0	0	0	0	NA	0
SRR8559192	2	M	NA	Urethra	Australia	Victoria	NA	NA	0	0	0	0	0	0	0	1	1	0	NA	0
SRR8559193	2	M	NA	Urethra	Australia	Victoria	NA	NA	0	0	0	0	0	0	0	0	0	0	NA	0
SRR8559194	2	W	MSW/WSM	Cervix	Australia	Victoria	NA	NA	0	0	0	0	0	0	0	0	0	0	NA	0
SRR8559195	2	M	NA	Urethra	Australia	Victoria	NA	NA	0	0	0	0	0	0	0	0	0	0	NA	0
SRR8559196	2	W	MSW/WSM	Cervix	Australia	Victoria	No	No	0	0	0	0	0	0	0	0	1	0	NA	0
SRR8559197	2	M	MSM	Pharynx	Australia	Victoria	No	No	0	0	0	0	0	0	0	0	1	0	NA	0
SRR8559198	2	W	MSW/WSM	Cervix	Australia	Victoria	No	No	0	0	0	0	0	0	0	1	1	0	NA	0
SRR8559199	2	M	MSM	Rectum	Australia	Victoria	No	No	0	0	0	0	0	0	0	1	1	0	NA	0
SRR8559200	2	M	NA	Urethra	Australia	Victoria	No	No	0	0	0	0	0	0	0	1	0	0	NA	0
SRR8559201	2	W	MSW/WSM	Cervix	Australia	Victoria	No	No	0	0	0	0	0	0	0	0	0	0	NA	0
SRR8559202	2	M	MSM	Urethra	Australia	Victoria	No	No	0	1	0	0	0	0	0	0	0	0	NA	0
SRR8559203	2	W	MSW/WSM	Cervix	Australia	Victoria	No	No	0	0	0	0	0	0	0	0	0	0	NA	0
SRR8559204	2	M	MSM	Rectum	Australia	Victoria	No	No	0	0	0	0	0	0	0	1	NA	0	NA	0
SRR8559205	2	W	MSW/WSM	Cervix	Australia	Victoria	No	No	0	0	0	0	0	0	0	0	0	0	NA	0
SRR8559206	2	W	MSW/WSM	Cervix	Australia	Victoria	No	No	0	0	0	0	0	0	0	0	0	0	NA	0
SRR8559207	2	M	MSM	Urethra	Australia	Victoria	No	No	0	0	0	0	0	0	0	0	1	0	NA	0
SRR8559208	2	M	MSM	Urethra	Australia	Victoria	No	No	0	0	0	0	0	0	0	1	0	0	NA	0
SRR8559209	2	M	MSM	Rectum	Australia	Victoria	No	No	0	0	0	0	0	0	0	0	1	0	NA	0
SRR8559210	2	M	MSM	Pharynx	Australia	Victoria	No	No	0	0	0	0	0	0	0	0	0	0	NA	0
SRR8559211	2	M	MSM	Urethra	Australia	Victoria	No	No	0	0	0	0	0	0	0	0	1	0	NA	0
SRR8559212	2	M	NA	Urethra	Australia	Victoria	NA	NA	0	0	0	0	0	0	0	0	0	0	NA	0
SRR8559213	2	M	NA	Rectum	Australia	Victoria	NA	NA	0	0	0	0	0	0	0	0	0	0	NA	0
SRR8559214	2	M	MSM	Rectum	Australia	Victoria	No	No	0	0	0	0	0	0	0	0	1	0	NA	0
SRR8559215	2	W	MSW/WSM	NA	Australia	Victoria	No	No	0	0	0	0	0	0	0	1	0	0	NA	0
SRR8559216	2	M	MSM	Rectum	Australia	Victoria	No	No	0	0	0	0	0	0	0	0	1	0	NA	0
SRR8559217	2	M	MSM	Rectum	Australia	Victoria	No	No	0	0	0	0	0	0	0	0	0	0	NA	0
SRR8559218	2	M	MSM	Urethra	Australia	Victoria	No	No	0	0	0	0	0	0	0	0	0	0	NA	0
SRR8559219	2	M	MSW/WSM	Urethra	Australia	Victoria	No	No	0	0	0	0	0	0	0	1	1	0	NA	0
SRR8559220	2	M	NA	Urethra	Australia	Victoria	NA	NA	0	0	0	0	0	0	0	0	1	0	NA	0
SRR8559221	2	M	MSM	Rectum	Australia	Victoria	No	No	0	0	0	0	0	0	0	1	1	0	NA	0
SRR8559222	2	M	MSM	Urethra	Australia	Victoria	No	No	0	0	0	0	0	0	0	1	NA	0	NA	0
SRR8559223	2	M	NA	Urethra	Australia	Victoria	NA	NA	0	0	0	0	0	0	0	0	0	0	NA	0
SRR8559224	2	M	MSW/WSM	Urethra	Australia	Victoria	Yes	No	0	0	0	0	0	0	0	1	0	0	NA	0
SRR8559225	2	M	MSM	Urethra	Australia	Victoria	No	No	0	0	0	0	0	0	0	1	NA	0	NA	0
SRR8559226	2	M	MSM	Pharynx	Australia	Victoria	No	No	0	0	0	0	0	0	0	1	0	0	NA	0
SRR8559227	2	M	MSM	Rectum	Australia	Victoria	No	No	0	0	0	0	0	0	0	1	0	0	NA	0
SRR8559228	2	M	MSM	Pharynx	Australia	Victoria	No	NA	0	0	0	0	0	0	0	1	1	0	NA	0
SRR8559229	2	M	MSW/WSM	Urethra	Australia	Victoria	No	NA	0	0	0	0	0	0	0	0	0	0	NA	0
SRR8559230	2	M	MSM	Pharynx	Australia	Victoria	No	No	0	0	0	0	0	0	0	0	1	0	NA	0
SRR8559231	2	M	MSM	Rectum	Australia	Victoria	No	NA	0	0	0	0	0	0	0	0	1	0	NA	0
SRR8559232	2	M	MSM	Rectum	Australia	Victoria	No	NA	0	0	0	0	0	0	0	0	1	0	NA	0
SRR8559233	2	M	MSM	Rectum	Australia	Victoria	No	NA	0	0	0	0	0	0	0	1	NA	0	NA	0
SRR8559234	2	M	MSM	Urethra	Australia	Victoria	No	No	0	0	0	0	0	0	0	1	1	0	NA	0
SRR8559235	2	W	MSW/WSM	Cervix	Australia	Victoria	NA	NA	0	0	0	0	0	0	0	1	NA	0	NA	0
SRR8559236	2	M	NA	Urethra	Australia	Victoria	NA	NA	0	0	0	0	0	0	0	1	0	0	NA	0
SRR8559237	2	M	MSM	Rectum	Australia	Victoria	No	No	0	0	0	0	0	0	0	1	1	0	NA	0
SRR8559238	2	M	MSW/WSM	Urethra	Australia	Victoria	No	No	0	0	0	0	0	0	0	1	1	0	NA	0
SRR8559239	2	W	MSW/WSM	Cervix	Australia	Victoria	No	No	0	0	0	0	0	0	0	0	0	0	NA	0
SRR8559240	2	M	MSM	Urethra	Australia	Victoria	No	No	0	0	0	0	0	0	0	0	1	0	NA	0
SRR8559241	2	M	MSM	Urethra	Australia	Victoria	No	No	0	0	0	0	0	0	0	1	1	0	NA	0
SRR8559242	2	M	MSM	Pharynx	Australia	Victoria	No	No	0	0	0	0	0	0	0	0	1	0	NA	0
SRR8559243	2	M	MSM	Rectum	Australia	Victoria	No	No	0	0	0	0	0	0	0	1	1	0	NA	0
SRR8559244	2	M	MSM	Urethra	Australia	Victoria	No	No	0	0	0	0	0	0	0	1	1	0	NA	0
SRR8559245	2	M	MSM	Pharynx	Australia	Victoria	No	No	0	0	0	0	0	0	0	0	0	0	NA	0
SRR8559246	2	M	MSM	Rectum	Australia	Victoria	No	No	0	0	0	0	0	0	0	1	1	0	NA	0
SRR8559247	2	M	MSM	Pharynx	Australia	Victoria	No	No	0	0	0	0	0	0	0	1	1	0	NA	0
SRR8559248	2	M	MSM	Rectum	Australia	Victoria	NA	No	1	0	0	0	0	0	0	0	1	0	NA	0
SRR8559249	2	M	MSM	Urethra	Australia	Victoria	No	No	0	0	0	0	0	0	0	0	1	0	NA	0
SRR8559250	2	M	MSM	Pharynx	Australia	Victoria	NA	No	0	0	0	0	0	0	0	0	1	0	NA	0
SRR8559251	2	M	MSW/WSM	Rectum	Australia	Victoria	NA	No	0	0	0	0	0	0	0	1	NA	0	NA	0
SRR8559252	2	M	MSW/WSM	Urethra	Australia	Victoria	No	No	0	0	0	0	0	0	0	1	1	0	NA	0
SRR8559253	2	M	MSM	Pharynx	Australia	Victoria	No	No	0	0	0	0	0	0	0	1	1	0	NA	0
SRR8559254	2	M	NA	Urethra	Australia	Victoria	NA	NA	0	0	0	0	0	0	0	1	1	0	NA	0
SRR8559255	2	W	MSW/WSM	Cervix	Australia	Victoria	NA	NA	0	0	0	0	0	0	0	0	0	0	NA	0
SRR8559256	2	M	NA	Urethra	Australia	Victoria	NA	NA	0	0	0	0	0	0	0	0	1	0	NA	0
SRR8559257	2	M	MSM	Rectum	Australia	Victoria	No	No	0	0	0	0	0	0	0	1	0	0	NA	0
SRR8559258	2	M	MSM	Rectum	Australia	Victoria	No	No	0	0	0	0	0	0	0	0	1	0	NA	0
SRR8559259	2	M	MSM	Urethra	Australia	Victoria	No	No	0	0	0	0	0	0	0	0	1	0	NA	0
SRR8559260	2	M	MSM	Pharynx	Australia	Victoria	No	No	0	0	0	0	0	0	0	1	NA	0	NA	0
SRR8559261	2	M	NA	Urethra	Australia	Victoria	NA	NA	0	0	0	0	0	0	0	1	1	0	NA	0
SRR8559262	2	M	MSM	Pharynx	Australia	Victoria	No	No	0	0	0	0	0	0	0	0	NA	0	NA	0
SRR8559263	2	M	MSM	Rectum	Australia	Victoria	NA	NA	0	0	0	0	0	0	0	0	0	0	NA	0
SRR8559264	2	M	MSW/WSM	Urethra	Australia	Victoria	Yes	NA	0	0	0	0	0	0	0	1	0	0	NA	0
SRR8559265	2	M	MSM	Urethra	Australia	Victoria	No	No	0	0	0	0	0	0	0	0	0	0	NA	0
SRR8559266	2	M	MSM	Rectum	Australia	Victoria	No	No	0	0	0	0	0	0	0	0	0	0	NA	0
SRR8559267	2	M	MSM	Rectum	Australia	Victoria	No	No	0	0	0	0	0	0	0	0	NA	0	NA	0
SRR8559268	2	M	MSM	Rectum	Australia	Victoria	No	No	0	0	0	0	0	0	0	1	1	0	NA	0
SRR8559269	2	M	MSM	Urethra	Australia	Victoria	NA	No	0	0	0	0	0	0	0	0	1	0	NA	0
SRR8559270	2	M	MSM	Rectum	Australia	Victoria	No	NA	0	0	0	0	0	0	0	1	1	0	NA	0
SRR8559271	2	W	MSW/WSM	Cervix	Australia	Victoria	No	No	0	0	0	0	0	0	0	1	0	0	NA	0
SRR8559272	2	W	MSW/WSM	Rectum	Australia	Victoria	Yes	No	0	0	0	0	0	0	0	1	1	0	NA	0
SRR8559273	2	W	MSW/WSM	Pharynx	Australia	Victoria	No	No	0	0	0	0	0	0	0	0	0	0	NA	0
SRR8559274	2	M	MSM	Rectum	Australia	Victoria	No	No	0	0	0	0	0	0	0	0	1	0	NA	0
SRR8559275	2	M	MSM	Rectum	Australia	Victoria	No	No	0	0	0	0	0	0	0	0	1	0	NA	0
SRR8559276	2	M	MSM	Urethra	Australia	Victoria	No	No	0	0	0	0	0	0	0	0	1	0	NA	0
SRR8559277	2	M	MSM	Rectum	Australia	Victoria	No	No	0	0	0	0	0	0	0	0	1	0	NA	0
SRR8559278	2	M	MSM	Urethra	Australia	Victoria	No	No	0	0	0	0	0	0	0	1	NA	0	NA	0
SRR8559279	2	M	MSM	NA	Australia	Victoria	No	No	0	0	0	0	0	0	0	0	1	0	NA	0
SRR8559280	2	M	MSM	Urethra	Australia	Victoria	No	No	0	0	0	0	0	0	0	0	1	0	NA	0
SRR8559281	2	M	MSM	Pharynx	Australia	Victoria	No	No	0	0	0	0	0	0	0	1	1	0	NA	0
SRR8559282	2	M	MSM	Urethra	Australia	Victoria	No	No	0	0	0	0	0	0	0	0	1	0	NA	0
SRR8559283	2	M	MSM	Rectum	Australia	Victoria	No	No	0	0	0	0	0	0	0	0	1	0	NA	0
SRR8559284	2	M	MSM	Pharynx	Australia	Victoria	No	No	0	0	0	0	0	0	0	1	NA	0	NA	0
SRR8559285	2	M	NA	Urethra	Australia	Victoria	NA	NA	0	0	0	0	0	0	0	0	1	0	NA	0
SRR8559286	2	M	MSW/WSM	Urethra	Australia	Victoria	No	No	0	1	0	0	0	0	0	0	1	0	NA	1
SRR8559287	2	M	MSM	Urethra	Australia	Victoria	No	No	0	0	0	0	0	0	0	0	NA	0	NA	0
SRR8559288	2	M	MSW/WSM	Urethra	Australia	Victoria	No	No	0	0	0	0	0	0	0	1	1	0	NA	0
SRR8559289	2	M	MSM	Pharynx	Australia	Victoria	No	No	0	0	0	0	0	0	0	0	1	0	NA	0
SRR8559290	2	M	MSM	Rectum	Australia	Victoria	NA	No	0	0	0	0	0	0	0	0	1	0	NA	0
SRR8559291	2	M	MSM	Rectum	Australia	Victoria	No	No	0	0	0	0	0	0	0	1	NA	0	NA	0
SRR8559292	2	M	MSM	Pharynx	Australia	Victoria	Yes	NA	1	0	0	0	0	0	0	0	0	0	NA	0
SRR8559293	2	M	MSM	Pharynx	Australia	Victoria	No	No	0	0	0	0	0	0	0	0	1	0	NA	0
SRR8559294	2	M	MSW/WSM	Urethra	Australia	Victoria	Yes	No	0	0	0	0	0	0	0	1	0	0	NA	0
SRR8559295	2	M	NA	Urethra	Australia	Victoria	No	No	0	0	0	0	0	0	0	1	1	0	NA	0
SRR8559296	2	M	MSM	Urethra	Australia	Victoria	No	No	0	0	0	0	0	0	0	1	0	0	NA	0
SRR8559297	2	M	MSM	Pharynx	Australia	Victoria	No	No	0	0	0	0	0	0	0	0	1	0	NA	0
SRR8559298	2	M	MSM	Pharynx	Australia	Victoria	No	No	0	0	0	0	0	0	0	1	1	0	NA	0
SRR8559299	2	M	NA	Urethra	Australia	Victoria	NA	NA	0	0	0	0	0	0	0	0	0	0	NA	0
SRR8559300	2	M	MSM	Rectum	Australia	Victoria	No	No	0	0	0	0	0	0	0	0	0	0	NA	0
SRR8559301	2	M	MSM	Urethra	Australia	Victoria	Yes	No	0	0	0	0	0	0	0	0	0	0	NA	0
SRR8559302	2	W	MSW/WSM	Pharynx	Australia	Victoria	No	Yes	0	0	0	0	0	0	0	0	0	0	NA	0
SRR8559303	2	M	MSM	NA	Australia	Victoria	No	NA	0	0	0	0	0	0	0	0	1	0	NA	1
SRR8559304	2	M	MSM	Urethra	Australia	Victoria	No	No	0	0	0	0	0	0	0	1	1	0	NA	0
SRR8559305	2	M	MSM	Pharynx	Australia	Victoria	No	No	0	0	0	0	0	0	0	0	1	0	NA	0
SRR8559306	2	M	MSW/WSM	Urethra	Australia	Victoria	No	No	0	0	0	0	0	0	0	1	1	0	NA	0
SRR8559307	2	M	MSM	Rectum	Australia	Victoria	No	No	0	0	0	0	0	0	0	0	1	0	NA	1
SRR8559308	2	M	MSM	Rectum	Australia	Victoria	No	No	0	0	0	0	0	0	0	0	1	0	NA	1
SRR8559309	2	M	MSM	Urethra	Australia	Victoria	Yes	No	0	0	0	0	0	0	0	0	0	0	NA	0
SRR8559310	2	M	MSM	Rectum	Australia	Victoria	No	No	0	0	0	0	0	0	0	0	0	0	NA	0
SRR8559311	2	M	MSM	Rectum	Australia	Victoria	No	No	0	0	0	0	0	0	0	0	1	0	NA	0
SRR8559312	2	M	MSM	Urethra	Australia	Victoria	No	No	0	0	0	0	0	0	0	0	1	0	NA	1
SRR8559313	2	M	MSM	Urethra	Australia	Victoria	No	No	0	0	0	0	0	0	0	0	0	0	NA	0
SRR8559314	2	M	MSM	Rectum	Australia	Victoria	No	No	0	0	0	0	0	0	0	1	1	0	NA	0
SRR8559315	2	M	MSM	Rectum	Australia	Victoria	No	No	0	0	0	0	0	0	0	0	1	0	NA	0
SRR8559316	2	M	MSM	Rectum	Australia	Victoria	No	NA	0	0	0	0	0	0	0	1	NA	0	NA	0
SRR8559317	2	M	MSM	Pharynx	Australia	Victoria	No	NA	0	0	0	0	0	0	0	1	1	0	NA	0
SRR8559318	2	W	MSW/WSM	Cervix	Australia	Victoria	No	No	0	0	0	0	0	0	0	0	1	0	NA	0
SRR8559319	2	M	MSM	Rectum	Australia	Victoria	No	No	0	0	0	0	0	0	0	1	NA	0	NA	0
SRR8559320	2	M	MSM	Urethra	Australia	Victoria	No	No	0	0	0	0	0	0	0	0	0	0	NA	0
SRR8559321	2	M	MSM	Urethra	Australia	Victoria	No	No	0	0	0	0	0	0	0	0	1	0	NA	0
SRR8559322	2	M	MSM	Rectum	Australia	Victoria	No	No	0	0	0	0	0	0	0	0	1	0	NA	1
SRR8559323	2	M	MSM	Urethra	Australia	Victoria	No	No	0	0	0	0	0	0	0	1	NA	0	NA	0
SRR8559324	2	M	NA	NA	Australia	Victoria	NA	NA	0	0	0	0	0	0	0	0	0	0	NA	0
SRR8559325	2	M	NA	Urethra	Australia	Victoria	NA	NA	0	0	0	0	0	0	0	0	0	0	NA	0
SRR8559326	2	W	MSW/WSM	Cervix	Australia	Victoria	NA	NA	0	0	0	0	0	0	0	0	0	0	NA	0
SRR8559327	2	M	MSM	Urethra	Australia	Victoria	No	No	0	0	0	0	0	0	0	0	1	0	NA	0
SRR8559328	2	M	MSM	Pharynx	Australia	Victoria	NA	No	0	0	0	0	0	0	0	0	1	0	NA	0
SRR8559329	2	M	MSM	Rectum	Australia	Victoria	No	No	0	0	0	0	0	0	0	0	0	0	NA	0
SRR8559330	2	M	MSM	Urethra	Australia	Victoria	No	No	0	0	0	0	0	0	0	0	1	0	NA	0
SRR8559331	2	M	NA	Urethra	Australia	Victoria	No	No	0	0	0	0	0	0	0	1	1	0	NA	0
SRR8559332	2	M	MSM	Rectum	Australia	Victoria	No	No	0	0	0	0	0	0	0	0	1	0	NA	0
SRR8559333	2	W	MSW/WSM	Pharynx	Australia	Victoria	No	No	0	0	0	0	0	0	0	0	0	0	NA	0
SRR8559334	2	W	MSW/WSM	Cervix	Australia	Victoria	No	No	0	0	0	0	0	0	0	1	1	0	NA	0
SRR8559335	2	W	MSW/WSM	Cervix	Australia	Victoria	Yes	No	0	0	0	0	0	0	0	0	1	0	NA	0
SRR8559336	2	M	MSM	Rectum	Australia	Victoria	No	No	0	0	0	0	0	0	0	0	0	0	NA	0
SRR8559337	2	M	MSM	Rectum	Australia	Victoria	No	No	0	0	0	0	0	0	0	0	0	0	NA	0
SRR8559338	2	M	MSM	Pharynx	Australia	Victoria	No	No	0	0	0	0	0	0	0	0	1	0	NA	0
SRR8559339	2	M	MSM	Urethra	Australia	Victoria	NA	No	0	0	0	0	0	0	0	0	1	0	NA	0
SRR8559340	2	W	MSW/WSM	Cervix	Australia	Victoria	No	NA	0	0	0	0	0	0	0	0	1	0	NA	0
SRR8559341	2	M	MSM	Rectum	Australia	Victoria	No	No	0	0	0	0	0	0	0	1	1	0	NA	0
SRR8559342	2	M	MSM	Pharynx	Australia	Victoria	No	No	0	0	0	0	0	0	0	0	1	0	NA	0
SRR8559343	2	M	MSW/WSM	NA	Australia	Victoria	No	No	0	0	0	0	0	0	0	0	1	0	NA	0
SRR8559344	2	M	MSM	Rectum	Australia	Victoria	No	No	0	0	0	0	0	0	0	0	0	0	NA	0
SRR8559345	2	M	MSM	Urethra	Australia	Victoria	No	No	0	0	0	0	0	0	0	0	1	0	NA	0
SRR8559346	2	M	MSM	Rectum	Australia	Victoria	No	No	0	0	0	0	0	0	0	0	1	0	NA	0
SRR8559347	2	M	MSM	Rectum	Australia	Victoria	No	No	0	0	0	0	0	0	0	0	0	0	NA	0
SRR8559348	2	W	MSW/WSM	Cervix	Australia	Victoria	No	No	0	0	0	0	0	0	0	0	1	0	NA	0
SRR8559349	2	M	MSM	Rectum	Australia	Victoria	No	No	0	0	0	0	0	0	0	0	1	0	NA	0
SRR8559350	2	M	MSM	Rectum	Australia	Victoria	No	No	0	0	0	0	0	0	0	1	1	0	NA	0
SRR8559351	2	M	MSM	Pharynx	Australia	Victoria	No	No	0	0	0	0	0	0	0	1	1	0	NA	0
SRR8559352	2	M	MSM	Urethra	Australia	Victoria	No	No	0	0	0	0	0	0	0	0	1	0	NA	0
SRR8559353	2	M	MSM	Rectum	Australia	Victoria	No	No	0	0	0	0	0	0	0	1	1	0	NA	0
SRR8559354	2	M	MSM	Pharynx	Australia	Victoria	No	No	0	0	0	0	0	0	0	0	0	0	NA	0
SRR8559355	2	M	MSM	Rectum	Australia	Victoria	No	No	0	0	0	0	0	0	0	0	1	0	NA	1
SRR8559356	2	M	MSM	Rectum	Australia	Victoria	No	No	0	0	0	0	0	0	0	0	1	0	NA	0
SRR8559357	2	W	MSW/WSM	Pharynx	Australia	Victoria	No	Yes	0	0	0	0	0	0	0	0	0	0	NA	0
SRR8559358	2	M	MSM	Urethra	Australia	Victoria	No	No	0	0	0	0	0	0	0	1	0	0	NA	0
SRR8559359	2	M	MSM	Urethra	Australia	Victoria	No	No	0	0	0	0	0	0	0	1	NA	0	NA	0
SRR8559360	2	M	MSM	Urethra	Australia	Victoria	No	No	0	0	0	0	0	0	0	0	0	0	NA	0
SRR8559361	2	M	MSM	Rectum	Australia	Victoria	No	No	0	0	0	0	0	0	0	0	0	0	NA	0
SRR8559362	2	M	MSM	Pharynx	Australia	Victoria	No	NA	0	0	0	0	0	0	0	1	NA	0	NA	0
SRR8559363	2	M	MSM	Rectum	Australia	Victoria	No	NA	0	0	0	0	0	0	0	0	0	0	NA	0
SRR8559364	2	M	MSM	Rectum	Australia	Victoria	No	No	0	0	0	0	0	0	0	1	0	0	NA	0
SRR8559365	2	W	MSW/WSM	Cervix	Australia	Victoria	No	No	0	0	0	0	0	0	0	0	0	0	NA	0
SRR8559366	2	M	NA	Pharynx	Australia	Victoria	NA	NA	0	0	0	0	0	0	0	0	1	0	NA	1
SRR8559367	2	M	NA	Urethra	Australia	Victoria	NA	NA	0	0	0	0	0	0	0	1	NA	0	NA	0
SRR8559368	2	M	NA	Urethra	Australia	Victoria	NA	NA	0	0	0	0	0	0	0	0	0	0	NA	0
SRR8559369	2	M	MSM	Urethra	Australia	Victoria	No	No	0	0	0	0	0	0	0	0	0	0	NA	0
SRR8559370	2	M	MSM	Urethra	Australia	Victoria	No	No	0	0	0	0	0	0	0	0	1	0	NA	0
SRR8559371	2	M	MSM	Rectum	Australia	Victoria	No	No	0	0	0	0	0	0	0	0	1	0	NA	0
SRR8559372	2	W	MSW/WSM	Cervix	Australia	Victoria	No	No	0	0	0	0	0	0	0	0	0	0	NA	0
SRR8559373	2	M	NA	Urethra	Australia	Victoria	No	No	0	0	0	0	0	0	0	0	0	0	NA	0
SRR8559374	2	W	MSW/WSM	Cervix	Australia	Victoria	No	No	0	0	0	0	0	0	0	0	0	0	NA	0
SRR8559375	2	M	MSM	Urethra	Australia	Victoria	No	No	0	0	0	0	0	0	0	0	0	0	NA	0
SRR8559376	2	M	MSM	Urethra	Australia	Victoria	No	No	0	0	0	0	0	0	0	1	1	0	NA	0
SRR8559377	2	W	MSW/WSM	Cervix	Australia	Victoria	NA	NA	0	0	0	0	0	0	0	0	0	0	NA	0
SRR8559378	2	M	MSW/WSM	Urethra	Australia	Victoria	No	No	0	0	0	0	0	0	0	1	0	0	NA	0
SRR8559379	2	W	MSW/WSM	Cervix	Australia	Victoria	NA	NA	0	0	0	0	0	0	0	1	0	0	NA	0
SRR8559380	2	M	MSM	Urethra	Australia	Victoria	No	No	0	0	0	0	0	0	0	1	1	0	NA	0
SRR8559381	2	M	MSM	Rectum	Australia	Victoria	No	NA	0	0	0	0	0	0	0	1	1	0	NA	0
SRR8559382	2	M	NA	Urethra	Australia	Victoria	NA	NA	0	0	0	0	0	0	0	0	1	0	NA	1
SRR8559383	2	W	MSW/WSM	Cervix	Australia	Victoria	No	No	0	0	0	0	0	0	0	0	0	0	NA	0
SRR8559384	2	M	MSM	Rectum	Australia	Victoria	No	NA	0	0	0	0	0	0	0	0	0	0	NA	0
SRR8559385	2	M	MSM	Rectum	Australia	Victoria	No	No	0	0	0	0	0	0	0	0	1	0	NA	0
SRR8559386	2	M	MSM	Rectum	Australia	Victoria	No	No	0	0	0	0	0	0	0	0	0	0	NA	0
SRR8559387	2	M	MSM	NA	Australia	Victoria	No	NA	0	0	0	0	0	0	0	0	0	0	NA	0
SRR8559388	2	M	NA	Urethra	Australia	Victoria	NA	NA	1	0	0	0	0	0	0	0	0	0	NA	0
SRR8559389	2	M	MSM	Rectum	Australia	Victoria	No	No	0	0	0	0	0	0	0	0	1	0	NA	0
SRR8559390	2	M	MSM	Urethra	Australia	Victoria	Yes	No	0	0	0	0	0	0	0	1	1	0	NA	0
SRR8559391	2	M	MSM	Pharynx	Australia	Victoria	No	No	0	0	0	0	0	0	0	0	1	0	NA	0
SRR8559392	2	M	MSM	Urethra	Australia	Victoria	No	No	0	0	0	0	0	0	0	0	0	0	NA	0
SRR8559393	2	M	MSM	Pharynx	Australia	Victoria	No	No	0	0	0	0	0	0	0	0	1	0	NA	0
SRR8559394	2	M	MSM	Urethra	Australia	Victoria	No	No	0	0	0	0	0	0	0	0	1	0	NA	0
SRR8559395	2	M	MSM	Pharynx	Australia	Victoria	No	No	0	0	0	0	0	0	0	1	NA	0	NA	0
SRR8559396	2	M	MSM	Rectum	Australia	Victoria	No	No	0	0	0	0	0	0	0	0	1	0	NA	0
SRR8559397	2	M	MSM	Pharynx	Australia	Victoria	Yes	No	0	0	0	0	0	0	0	1	1	0	NA	0
SRR8559398	2	W	MSW/WSM	Cervix	Australia	Victoria	NA	NA	0	0	0	0	0	0	0	0	1	0	NA	0
SRR8559399	2	W	MSW/WSM	Cervix	Australia	Victoria	NA	NA	0	0	0	0	0	0	0	0	1	0	NA	0
SRR8559400	2	M	MSW/WSM	Urethra	Australia	Victoria	No	No	0	0	0	0	0	0	0	0	0	0	NA	0
SRR8559401	2	M	MSM	Pharynx	Australia	Victoria	No	No	0	0	0	0	0	0	0	0	1	0	NA	0
SRR8559402	2	M	MSM	Rectum	Australia	Victoria	No	NA	0	0	0	0	0	0	0	0	1	0	NA	0
SRR8559403	2	M	MSW/WSM	NA	Australia	Victoria	NA	NA	0	0	0	0	0	0	0	0	0	0	NA	0
SRR8559404	2	M	MSM	Urethra	Australia	Victoria	No	No	0	0	0	0	0	0	0	0	1	0	NA	0
SRR8559405	2	M	MSM	Pharynx	Australia	Victoria	No	No	0	0	0	0	0	0	0	0	1	0	NA	0
SRR8559406	2	M	MSW/WSM	Urethra	Australia	Victoria	No	No	0	0	0	0	0	0	0	0	0	0	NA	0
SRR8559407	2	M	MSM	Rectum	Australia	Victoria	No	No	0	0	0	0	0	0	0	1	0	0	NA	0
SRR8559408	2	M	MSM	Pharynx	Australia	Victoria	No	No	0	0	0	0	0	0	0	0	1	0	NA	0
SRR8559409	2	M	MSW/WSM	Urethra	Australia	Victoria	No	NA	0	0	0	0	0	0	0	0	0	0	NA	0
SRR8559410	2	M	MSM	Urethra	Australia	Victoria	No	No	0	0	0	0	0	0	0	1	1	0	NA	0
SRR8559411	2	M	MSM	Rectum	Australia	Victoria	No	No	0	0	0	0	0	0	0	0	0	0	NA	0
SRR8559412	2	M	MSM	Rectum	Australia	Victoria	No	Yes	0	0	0	0	0	0	0	1	1	0	NA	0
SRR8559413	2	M	MSM	Rectum	Australia	Victoria	No	No	0	0	0	0	0	0	0	1	1	0	NA	0
SRR8559414	2	W	MSW/WSM	Cervix	Australia	Victoria	NA	NA	0	0	0	0	0	0	0	1	0	0	NA	0
SRR8559415	2	M	MSM	Pharynx	Australia	Victoria	No	No	0	0	0	0	0	0	0	1	0	0	NA	0
SRR8559416	2	M	MSM	Pharynx	Australia	Victoria	No	No	0	0	0	0	0	0	0	1	0	0	NA	0
SRR8559417	2	M	MSM	Urethra	Australia	Victoria	No	NA	0	0	0	0	0	0	0	0	1	0	NA	0
SRR8559418	2	M	MSM	Pharynx	Australia	Victoria	No	No	0	0	0	0	0	0	0	0	1	0	NA	0
SRR8559419	2	M	MSM	Urethra	Australia	Victoria	No	No	0	0	0	0	0	0	0	0	0	0	NA	0
SRR8559420	2	M	MSM	Urethra	Australia	Victoria	No	No	0	0	0	0	0	0	0	1	0	0	NA	0
SRR8559421	2	M	MSM	Rectum	Australia	Victoria	No	No	0	0	0	0	0	0	0	0	1	0	NA	0
SRR8559422	2	M	MSW/WSM	Urethra	Australia	Victoria	No	No	0	0	0	0	0	0	0	1	1	0	NA	0
SRR8559423	2	W	MSW/WSM	Cervix	Australia	Victoria	No	No	0	0	0	0	0	0	0	0	1	0	NA	0
SRR8559424	2	M	MSM	Urethra	Australia	Victoria	No	No	0	0	0	0	0	0	0	0	1	0	NA	1
SRR8559425	2	M	NA	Urethra	Australia	Victoria	NA	NA	0	0	0	0	0	0	0	1	0	0	NA	0
SRR8559426	2	M	MSW/WSM	Rectum	Australia	Victoria	NA	No	0	0	0	0	0	0	0	0	1	0	NA	0
SRR8559427	2	M	MSM	Urethra	Australia	Victoria	No	NA	0	1	0	0	0	0	0	0	0	0	NA	1
SRR8559428	2	W	MSW/WSM	Pharynx	Australia	Victoria	No	No	0	0	0	0	0	0	0	0	1	0	NA	1
SRR8559429	2	W	MSW/WSM	Pharynx	Australia	Victoria	No	Yes	0	0	0	0	0	0	0	1	0	0	NA	0
SRR8559430	2	M	MSM	Pharynx	Australia	Victoria	No	Yes	0	0	0	0	0	0	0	0	1	0	NA	1
SRR8559431	2	M	MSM	Urethra	Australia	Victoria	No	No	0	0	0	0	0	0	0	0	0	0	NA	0
SRR8559432	2	W	MSW/WSM	Cervix	Australia	Victoria	No	NA	0	0	0	0	0	0	0	0	0	0	NA	0
SRR8559433	2	M	MSM	Pharynx	Australia	Victoria	No	No	0	0	0	0	0	0	0	0	1	0	NA	0
SRR8559434	2	M	MSM	Urethra	Australia	Victoria	No	No	0	0	0	0	0	0	0	0	1	0	NA	0
SRR8559435	2	M	MSW/WSM	Urethra	Australia	Victoria	No	No	0	0	0	0	0	0	0	1	1	0	NA	0
SRR8559436	2	W	MSW/WSM	Cervix	Australia	Victoria	NA	NA	0	0	0	0	0	0	0	1	NA	0	NA	0
SRR8559437	2	M	MSM	Urethra	Australia	Victoria	No	No	0	0	0	0	0	0	0	1	1	0	NA	0
SRR8559438	2	M	MSM	Pharynx	Australia	Victoria	No	No	0	0	0	0	0	0	0	0	1	0	NA	0
SRR8559439	2	M	MSM	Rectum	Australia	Victoria	No	No	0	0	0	0	0	0	0	1	NA	0	NA	0
SRR8559440	2	M	MSM	Pharynx	Australia	Victoria	No	No	0	0	0	0	0	0	0	0	1	0	NA	0
SRR8559441	2	M	MSM	Urethra	Australia	Victoria	No	No	0	0	0	0	0	0	0	0	1	0	NA	0
SRR8559442	2	M	MSM	Rectum	Australia	Victoria	No	NA	0	0	0	0	0	0	0	1	1	0	NA	0
SRR8559443	2	M	MSM	Rectum	Australia	Victoria	No	No	0	0	0	0	0	0	0	0	1	0	NA	0
SRR8559444	2	M	MSM	Pharynx	Australia	Victoria	No	No	0	0	0	0	0	0	0	0	1	0	NA	0
SRR8559445	2	W	MSW/WSM	Cervix	Australia	Victoria	No	No	0	0	0	0	0	0	0	0	0	0	NA	0
SRR8559446	2	W	MSW/WSM	Cervix	Australia	Victoria	NA	NA	0	0	0	0	0	0	0	0	0	0	NA	0
SRR8559447	2	M	MSW/WSM	Urethra	Australia	Victoria	No	No	0	0	0	0	0	0	0	0	1	0	NA	0
SRR8559448	2	M	MSM	Rectum	Australia	Victoria	No	No	0	0	0	0	0	0	0	0	0	0	NA	0
SRR8559449	2	M	MSM	Urethra	Australia	Victoria	No	No	0	0	0	0	0	0	0	1	NA	0	NA	0
SRR8559450	2	W	MSW/WSM	Cervix	Australia	Victoria	No	Yes	0	0	0	0	0	0	0	0	1	0	NA	0
SRR8559451	2	M	MSW/WSM	NA	Australia	Victoria	No	No	0	0	0	0	0	0	0	1	1	0	NA	0
SRR8559452	2	M	NA	Rectum	Australia	Victoria	NA	NA	0	0	0	0	0	0	0	0	1	0	NA	0
SRR8559453	2	M	MSM	Rectum	Australia	Victoria	No	No	0	0	0	0	0	0	0	1	1	0	NA	0
SRR8559454	2	M	MSM	Urethra	Australia	Victoria	No	No	0	0	0	0	0	0	0	0	0	0	NA	0
SRR8559455	2	M	MSM	Rectum	Australia	Victoria	No	No	0	0	0	0	0	0	0	0	1	0	NA	0
SRR8559456	2	M	MSM	Pharynx	Australia	Victoria	NA	No	0	0	0	0	0	0	0	1	NA	0	NA	0
SRR8559457	2	M	MSM	Rectum	Australia	Victoria	No	No	0	0	0	0	0	0	0	1	NA	0	NA	0
SRR8559458	2	M	MSW/WSM	Urethra	Australia	Victoria	No	No	0	0	0	0	0	0	0	0	0	0	NA	0
SRR8559459	2	M	MSM	Pharynx	Australia	Victoria	No	No	0	0	0	0	0	0	0	0	1	0	NA	0
SRR8559460	2	M	NA	Rectum	Australia	Victoria	NA	NA	0	0	0	0	0	0	0	0	0	0	NA	0
SRR8559461	2	W	MSW/WSM	Cervix	Australia	Victoria	No	No	0	0	0	0	0	0	0	1	NA	0	NA	0
SRR8559462	2	M	MSW/WSM	Urethra	Australia	Victoria	No	No	0	0	0	0	0	0	0	0	0	0	NA	0
SRR8559463	2	W	MSW/WSM	Cervix	Australia	Victoria	No	No	0	0	0	0	0	0	0	0	0	0	NA	0
SRR8559464	2	M	MSM	Pharynx	Australia	Victoria	No	NA	0	0	0	0	0	0	0	1	NA	0	NA	0
SRR8559465	2	M	MSM	NA	Australia	Victoria	No	No	0	0	0	0	0	0	0	0	NA	0	NA	0
SRR8559466	2	M	MSW/WSM	Urethra	Australia	Victoria	No	No	0	0	0	0	0	0	0	0	0	0	NA	0
SRR8559467	2	M	MSW/WSM	Urethra	Australia	Victoria	No	No	0	0	0	0	0	0	0	0	0	0	NA	0
SRR8559468	2	W	MSW/WSM	Cervix	Australia	Victoria	Yes	No	0	0	0	0	0	0	0	0	0	0	NA	0
SRR8559469	2	W	MSW/WSM	Cervix	Australia	Victoria	No	No	0	0	0	0	0	0	0	0	0	0	NA	0
SRR8559470	2	W	MSW/WSM	Cervix	Australia	Victoria	Yes	No	0	0	0	0	0	0	0	1	1	0	NA	0
SRR8559471	2	M	MSM	Rectum	Australia	Victoria	No	No	0	0	0	0	0	0	0	0	1	0	NA	1
SRR8559472	2	M	MSM	Pharynx	Australia	Victoria	No	NA	0	0	0	0	0	0	0	1	0	0	NA	0
SRR8559473	2	W	MSW/WSM	Cervix	Australia	Victoria	NA	NA	0	0	0	0	0	0	0	1	1	0	NA	0
SRR8559474	2	M	MSM	Pharynx	Australia	Victoria	No	No	0	0	0	0	0	0	0	0	0	0	NA	0
SRR8559475	2	NA	NA	Urethra	Australia	Victoria	No	Yes	0	0	0	0	0	0	0	0	1	0	NA	0
SRR8559476	2	M	MSM	Pharynx	Australia	Victoria	No	No	0	0	0	0	0	0	0	1	1	0	NA	0
SRR8559477	2	M	MSM	Urethra	Australia	Victoria	No	No	0	0	0	0	0	0	0	0	1	0	NA	0
SRR8559478	2	M	MSM	Pharynx	Australia	Victoria	No	No	0	0	0	0	0	0	0	0	1	0	NA	0
SRR8559479	2	M	MSM	Rectum	Australia	Victoria	No	No	0	0	0	0	0	0	0	1	NA	0	NA	0
SRR8559480	2	W	MSW/WSM	Cervix	Australia	Victoria	No	No	0	0	0	0	0	0	0	0	0	0	NA	0
SRR8559481	2	W	MSW/WSM	Cervix	Australia	Victoria	No	No	0	0	0	0	0	0	0	1	1	0	NA	0
SRR8559482	2	M	MSM	Pharynx	Australia	Victoria	No	No	0	0	0	0	0	0	0	1	NA	0	NA	0
SRR8559483	2	W	MSW/WSM	Cervix	Australia	Victoria	No	No	0	0	0	0	0	0	0	1	0	0	NA	0
SRR8559484	2	M	MSM	Rectum	Australia	Victoria	No	NA	0	0	0	0	0	0	0	0	1	0	NA	0
SRR8559485	2	M	MSM	Rectum	Australia	Victoria	No	NA	0	0	0	0	0	0	0	0	0	0	NA	0
SRR8559486	2	M	NA	NA	Australia	Victoria	NA	NA	0	0	0	0	0	0	0	0	1	0	NA	0
SRR8559487	2	M	MSW/WSM	Urethra	Australia	Victoria	No	No	0	0	0	0	0	0	0	0	0	0	NA	0
SRR8559488	2	W	MSW/WSM	Cervix	Australia	Victoria	NA	NA	0	0	0	0	0	0	0	0	0	0	NA	0
SRR8559489	2	M	NA	Urethra	Australia	Victoria	NA	NA	0	0	0	0	0	0	0	1	1	0	NA	0
SRR8559490	2	M	MSM	Urethra	Australia	Victoria	No	NA	0	0	0	0	0	0	0	1	NA	0	NA	0
SRR8559491	2	W	MSW/WSM	Cervix	Australia	Victoria	No	No	0	0	0	0	0	0	0	1	1	0	NA	0
SRR8559492	2	M	MSM	Urethra	Australia	Victoria	No	No	0	0	0	0	0	0	0	0	1	0	NA	0
SRR8559493	2	M	MSM	Urethra	Australia	Victoria	No	No	0	0	0	0	0	0	0	0	0	0	NA	0
SRR8559494	2	M	MSM	Urethra	Australia	Victoria	No	No	0	0	0	0	0	0	0	1	0	0	NA	0
SRR8559495	2	M	MSW/WSM	Urethra	Australia	Victoria	No	No	0	0	0	0	0	0	0	0	0	0	NA	0
SRR8559496	2	M	MSM	Pharynx	Australia	Victoria	Yes	No	0	0	0	0	0	0	0	1	0	0	NA	0
SRR8559497	2	M	MSM	Urethra	Australia	Victoria	No	No	0	0	0	0	0	0	0	0	1	0	NA	0
SRR8559498	2	M	MSM	Rectum	Australia	Victoria	No	No	0	0	0	0	0	0	0	1	1	0	NA	0
SRR8559499	2	M	MSW/WSM	Urethra	Australia	Victoria	No	No	0	0	0	0	0	0	0	0	1	0	NA	0
SRR8559500	2	M	MSW/WSM	Urethra	Australia	Victoria	No	No	0	0	0	0	0	0	0	0	0	0	NA	0
SRR8559501	2	M	MSM	Pharynx	Australia	Victoria	No	No	0	0	0	0	0	0	0	0	1	0	NA	0
SRR8559502	2	M	MSM	Urethra	Australia	Victoria	No	No	0	0	0	0	0	0	0	0	1	0	NA	0
SRR8559503	2	M	NA	Urethra	Australia	Victoria	NA	NA	0	0	0	0	0	0	0	0	1	0	NA	0
SRR8559504	2	M	MSM	Urethra	Australia	Victoria	No	No	0	0	0	0	0	0	0	0	0	0	NA	0
SRR8559505	2	M	MSM	Rectum	Australia	Victoria	No	No	0	0	0	0	0	0	0	0	1	0	NA	1
SRR8559506	2	W	MSW/WSM	Pharynx	Australia	Victoria	No	Yes	0	0	0	0	0	0	0	0	0	0	NA	0
SRR8559507	2	M	MSM	Rectum	Australia	Victoria	No	No	0	0	0	0	0	0	0	0	1	0	NA	1
SRR8559508	2	M	MSM	Rectum	Australia	Victoria	No	No	0	0	0	0	0	0	0	1	1	0	NA	0
SRR8559509	2	M	MSM	Urethra	Australia	Victoria	No	No	0	0	0	0	0	0	0	1	0	0	NA	0
SRR8559510	2	M	MSM	Pharynx	Australia	Victoria	No	No	0	0	0	0	0	0	0	1	0	0	NA	0
SRR8559511	2	W	MSW/WSM	Cervix	Australia	Victoria	No	No	0	0	0	0	0	0	0	1	NA	0	NA	0
SRR8559512	2	M	MSM	Urethra	Australia	Victoria	No	NA	0	0	0	0	0	0	0	1	1	0	NA	0
SRR8559513	2	M	MSM	Urethra	Australia	Victoria	No	NA	0	0	0	0	0	0	0	0	1	0	NA	0
SRR8559514	2	M	MSM	Rectum	Australia	Victoria	No	NA	0	0	0	0	0	0	0	0	1	0	NA	0
SRR8559515	2	M	MSW/WSM	Urethra	Australia	Victoria	NA	NA	0	0	0	0	0	0	0	0	1	0	NA	0
SRR8559516	2	M	MSM	Urethra	Australia	Victoria	No	No	0	0	0	0	0	0	0	0	1	0	NA	1
SRR8559517	2	M	MSM	Urethra	Australia	Victoria	No	No	0	0	0	0	0	0	0	0	1	0	NA	0
SRR8559518	2	W	MSW/WSM	Cervix	Australia	Victoria	No	No	0	0	0	0	0	0	0	0	0	0	NA	0
SRR8559519	2	W	MSW/WSM	Cervix	Australia	Victoria	No	No	0	0	0	0	0	0	0	0	0	0	NA	0
SRR8559520	2	M	MSM	Pharynx	Australia	Victoria	No	NA	0	0	0	0	0	0	0	0	1	0	NA	0
SRR8559521	2	M	MSM	Urethra	Australia	Victoria	No	No	0	0	0	0	0	0	0	1	1	0	NA	0
SRR8559522	2	M	MSM	Pharynx	Australia	Victoria	No	No	0	0	0	0	0	0	0	1	0	0	NA	0
SRR8559523	2	M	MSW/WSM	Urethra	Australia	Victoria	No	No	0	0	0	0	0	0	0	0	0	0	NA	0
SRR8559524	2	M	MSM	Urethra	Australia	Victoria	No	No	0	0	0	0	0	0	0	0	1	0	NA	0
SRR8559525	2	M	MSW/WSM	Urethra	Australia	Victoria	No	Yes	0	0	0	0	0	0	0	0	0	0	NA	0
SRR8559526	2	M	MSW/WSM	Urethra	Australia	Victoria	No	No	0	0	0	0	0	0	0	0	0	0	NA	0
SRR8559527	2	M	MSM	Urethra	Australia	Victoria	No	No	0	0	0	0	0	0	0	0	1	0	NA	0
SRR8559528	2	M	MSW/WSM	Urethra	Australia	Victoria	No	No	0	0	0	0	0	0	0	0	NA	0	NA	0
SRR8559529	2	M	MSM	Pharynx	Australia	Victoria	No	No	0	0	0	0	0	0	0	0	0	0	NA	0
SRR8559530	2	M	MSM	Rectum	Australia	Victoria	No	No	0	0	0	0	0	0	0	0	1	0	NA	0
SRR8559531	2	M	MSW/WSM	Urethra	Australia	Victoria	No	No	0	0	0	0	0	0	0	0	0	0	NA	0
SRR8559532	2	W	MSW/WSM	Cervix	Australia	Victoria	NA	NA	0	0	0	0	0	0	0	1	0	0	NA	0
SRR8559533	2	M	NA	Pharynx	Australia	Victoria	NA	NA	0	0	0	0	0	0	0	0	1	0	NA	1
SRR8559534	2	M	MSW/WSM	Urethra	Australia	Victoria	No	No	0	0	0	0	0	0	0	0	1	0	NA	0
SRR8559535	2	W	MSW/WSM	Pharynx	Australia	Victoria	Yes	Yes	0	0	0	0	0	0	0	1	1	0	NA	0
SRR8559536	2	M	MSM	Pharynx	Australia	Victoria	Yes	No	0	0	0	0	0	0	0	0	0	0	NA	0
SRR8559537	2	M	MSM	Rectum	Australia	Victoria	No	No	0	0	0	0	0	0	0	1	NA	0	NA	0
SRR8559538	2	M	MSM	Rectum	Australia	Victoria	No	No	0	0	0	0	0	0	0	1	1	0	NA	0
SRR8559539	2	M	MSM	Urethra	Australia	Victoria	No	No	0	0	0	0	0	0	0	0	1	0	NA	0
SRR8559540	2	M	MSM	Urethra	Australia	Victoria	No	NA	0	0	0	0	0	0	0	1	1	0	NA	0
SRR8559541	2	M	MSM	Urethra	Australia	Victoria	No	No	0	0	0	0	0	0	0	0	1	0	NA	0
SRR8559542	2	M	MSM	Urethra	Australia	Victoria	No	No	0	0	0	0	0	0	0	0	1	0	NA	0
SRR8559543	2	M	MSM	Urethra	Australia	Victoria	No	No	0	0	0	0	0	0	0	0	1	0	NA	0
SRR8559544	2	M	MSM	Pharynx	Australia	Victoria	No	No	0	0	0	0	0	0	0	0	1	0	NA	0
SRR8559545	2	M	MSM	Urethra	Australia	Victoria	No	No	0	0	0	0	0	0	0	1	0	0	NA	0
SRR8559546	2	W	MSW/WSM	Cervix	Australia	Victoria	No	No	0	0	0	0	0	0	0	0	0	0	NA	0
SRR8559547	2	M	MSM	Urethra	Australia	Victoria	No	No	0	0	0	0	0	0	0	0	1	0	NA	0
SRR8559548	2	M	MSM	Urethra	Australia	Victoria	No	No	0	0	0	0	0	0	0	0	1	0	NA	0
SRR8559549	2	M	MSM	Rectum	Australia	Victoria	No	No	0	0	0	0	0	0	0	0	1	0	NA	0
SRR8559550	2	M	MSM	Pharynx	Australia	Victoria	No	No	0	0	0	0	0	0	0	1	0	0	NA	0
SRR8559551	2	M	NA	Urethra	Australia	Victoria	No	No	0	1	0	0	0	0	0	0	0	0	NA	0
SRR8559552	2	M	MSM	Rectum	Australia	Victoria	No	No	0	0	0	0	0	0	0	0	1	0	NA	0
SRR8559553	2	M	MSM	Pharynx	Australia	Victoria	No	No	0	0	0	0	0	0	0	1	0	0	NA	0
SRR8559554	2	M	NA	Urethra	Australia	Victoria	NA	NA	0	0	0	0	0	0	0	1	1	0	NA	0
SRR8559555	2	M	MSM	Rectum	Australia	Victoria	No	No	0	0	0	0	0	0	0	0	1	0	NA	0
SRR8559556	2	M	MSM	Pharynx	Australia	Victoria	No	No	0	0	0	0	0	0	0	1	0	0	NA	0
SRR8559557	2	M	MSM	Urethra	Australia	Victoria	No	No	0	0	0	0	0	0	0	1	0	0	NA	0
SRR8559558	2	M	MSM	Pharynx	Australia	Victoria	No	No	0	0	0	0	0	0	0	0	1	0	NA	0
SRR8559559	2	M	MSM	Pharynx	Australia	Victoria	NA	No	0	0	0	0	0	0	0	0	0	0	NA	0
SRR8559560	2	M	NA	Urethra	Australia	Victoria	No	No	0	0	0	0	0	0	0	0	1	0	NA	0
SRR8559561	2	M	MSM	Pharynx	Australia	Victoria	No	No	0	0	0	0	0	0	0	0	0	0	NA	0
SRR8559562	2	M	MSM	Urethra	Australia	Victoria	No	NA	0	0	0	0	0	0	0	0	0	0	NA	0
SRR8559563	2	M	MSM	Urethra	Australia	Victoria	NA	No	0	0	0	0	0	0	0	0	1	0	NA	0
SRR8559564	2	M	NA	Urethra	Australia	Victoria	NA	NA	0	0	0	0	0	0	0	0	0	0	NA	0
SRR8559565	2	M	MSW/WSM	Urethra	Australia	Victoria	No	No	0	0	0	0	0	0	0	0	0	0	NA	0
SRR8559566	2	M	MSW/WSM	Urethra	Australia	Victoria	No	NA	0	0	0	0	0	0	0	1	NA	0	NA	0
SRR8559567	2	M	MSM	Urethra	Australia	Victoria	No	No	0	0	0	0	0	0	0	1	1	0	NA	0
SRR8559568	2	M	MSM	Pharynx	Australia	Victoria	No	No	0	0	0	0	0	0	0	0	1	0	NA	0
SRR8559569	2	M	MSM	Urethra	Australia	Victoria	No	No	0	0	0	0	0	0	0	0	0	0	NA	0
SRR8559570	2	M	MSM	Urethra	Australia	Victoria	No	No	0	0	0	0	0	0	0	0	1	0	NA	0
SRR8559571	2	M	MSW/WSM	Urethra	Australia	Victoria	No	No	0	1	0	0	0	0	0	0	0	0	NA	0
SRR8559572	2	M	MSM	Urethra	Australia	Victoria	No	No	0	0	0	0	0	0	0	0	0	0	NA	0
SRR8559573	2	M	MSW/WSM	Urethra	Australia	Victoria	NA	No	0	0	0	0	0	0	0	0	0	0	NA	0
SRR8559574	2	W	MSW/WSM	Cervix	Australia	Victoria	No	NA	0	0	0	0	0	0	0	1	0	0	NA	0
SRR8559575	2	M	MSM	Rectum	Australia	Victoria	No	No	0	0	0	0	0	0	0	1	NA	0	NA	0
SRR8559576	2	M	MSM	Urethra	Australia	Victoria	No	No	0	0	0	0	0	0	0	0	1	0	NA	1
SRR8559577	2	M	MSM	Rectum	Australia	Victoria	No	No	0	0	0	0	0	0	0	1	NA	0	NA	0
SRR8559578	2	M	MSM	Pharynx	Australia	Victoria	Yes	No	0	0	0	0	0	0	0	0	0	0	NA	0
SRR8559579	2	W	MSW/WSM	Cervix	Australia	Victoria	NA	NA	0	0	0	0	0	0	0	1	1	0	NA	0
SRR8559580	2	M	MSW/WSM	Urethra	Australia	Victoria	No	No	0	0	0	0	0	0	0	0	0	0	NA	0
SRR8559581	2	M	MSM	Rectum	Australia	Victoria	No	No	0	0	0	0	0	0	0	0	1	0	NA	0
SRR8559582	2	M	MSM	Rectum	Australia	Victoria	No	No	0	0	0	0	0	0	0	1	1	0	NA	0
SRR8559583	2	M	MSM	Pharynx	Australia	Victoria	No	NA	0	0	0	0	0	0	0	0	1	0	NA	0
SRR8559584	2	M	MSW/WSM	Urethra	Australia	Victoria	No	NA	0	0	0	0	0	0	0	1	0	0	NA	0
SRR8559585	2	W	MSW/WSM	Cervix	Australia	Victoria	NA	NA	0	0	0	0	0	0	0	0	0	0	NA	0
SRR8559586	2	W	MSW/WSM	Cervix	Australia	Victoria	NA	NA	0	0	0	0	0	0	0	1	0	0	NA	0
SRR8559587	2	M	MSM	Pharynx	Australia	Victoria	No	No	0	0	0	0	0	0	0	1	1	0	NA	0
SRR8559588	2	M	MSM	Rectum	Australia	Victoria	No	No	0	0	0	0	0	0	0	0	1	0	NA	0
SRR8559589	2	M	MSM	Rectum	Australia	Victoria	No	No	0	0	0	0	0	0	0	1	0	0	NA	0
SRR8559590	2	M	MSM	Urethra	Australia	Victoria	No	No	0	0	0	0	0	0	0	0	1	0	NA	0
SRR8559591	2	M	MSM	Rectum	Australia	Victoria	Yes	No	0	0	0	0	0	0	0	0	1	0	NA	0
SRR8559592	2	M	MSM	Pharynx	Australia	Victoria	No	NA	0	0	0	0	0	0	0	0	1	0	NA	0
SRR8559593	2	M	MSM	Rectum	Australia	Victoria	No	No	0	0	0	0	0	0	0	0	1	0	NA	1
SRR8559594	2	M	MSM	Rectum	Australia	Victoria	No	NA	0	0	0	0	0	0	0	0	1	0	NA	0
SRR8559595	2	M	MSM	Pharynx	Australia	Victoria	No	No	0	0	0	0	0	0	0	0	1	0	NA	0
SRR8559596	2	M	MSM	NA	Australia	Victoria	No	No	0	0	0	0	0	0	0	0	1	0	NA	0
SRR8559597	2	M	NA	Rectum	Australia	Victoria	NA	NA	0	0	0	0	0	0	0	0	1	0	NA	0
SRR8559598	2	M	MSM	Pharynx	Australia	Victoria	No	No	0	0	0	0	0	0	0	0	0	0	NA	0
SRR8559599	2	M	NA	Urethra	Australia	Victoria	NA	No	0	0	0	0	0	0	0	1	1	0	NA	0
SRR8559600	2	W	MSW/WSM	Cervix	Australia	Victoria	Yes	No	0	0	0	0	0	0	0	0	1	0	NA	0
SRR8559601	2	W	MSW/WSM	Cervix	Australia	Victoria	No	No	0	0	0	0	0	0	0	0	0	0	NA	0
SRR8559602	2	M	MSM	Urethra	Australia	Victoria	No	No	0	0	0	0	0	0	0	0	0	0	NA	0
SRR8559603	2	M	NA	Urethra	Australia	Victoria	NA	NA	0	0	0	0	0	0	0	0	0	0	NA	0
SRR8559604	2	M	NA	Urethra	Australia	Victoria	NA	NA	0	0	0	0	0	0	0	0	0	0	NA	0
SRR8559605	2	M	MSM	Urethra	Australia	Victoria	No	No	0	0	0	0	0	0	0	1	0	0	NA	0
SRR8559606	2	W	MSW/WSM	Cervix	Australia	Victoria	No	NA	0	0	0	0	0	0	0	1	1	0	NA	0
SRR8559607	2	M	MSM	Pharynx	Australia	Victoria	No	No	0	0	0	0	0	0	0	1	NA	0	NA	0
SRR8559608	2	M	MSM	Rectum	Australia	Victoria	NA	No	0	0	0	0	0	0	0	1	1	0	NA	0
SRR8559609	2	W	MSW/WSM	Cervix	Australia	Victoria	NA	Yes	0	0	0	0	0	0	0	1	1	0	NA	0
SRR8559610	2	M	MSM	Rectum	Australia	Victoria	NA	No	0	0	0	0	0	0	0	0	1	0	NA	0
SRR8559611	2	W	MSW/WSM	Cervix	Australia	Victoria	No	No	0	0	0	0	0	0	0	1	NA	0	NA	0
SRR8559612	2	M	NA	Rectum	Australia	Victoria	NA	NA	0	0	0	0	0	0	0	0	1	0	NA	1
SRR8559613	2	M	MSM	Urethra	Australia	Victoria	No	Yes	0	0	0	0	0	0	0	0	1	0	NA	0
SRR8559614	2	M	MSW/WSM	Urethra	Australia	Victoria	No	No	0	0	0	0	0	0	0	1	1	0	NA	0
SRR8559615	2	M	MSM	Rectum	Australia	Victoria	No	No	0	0	0	0	0	0	0	0	1	0	NA	0
SRR8559616	2	M	MSM	Rectum	Australia	Victoria	No	No	0	0	0	0	0	0	0	0	1	0	NA	0
SRR8559617	2	M	MSM	Rectum	Australia	Victoria	No	No	0	0	0	0	0	0	0	1	1	0	NA	0
SRR8559618	2	M	MSM	Rectum	Australia	Victoria	No	No	0	0	0	0	0	0	0	0	0	0	NA	0
SRR8559619	2	M	MSW/WSM	Urethra	Australia	Victoria	Yes	No	0	0	0	0	0	0	0	1	1	0	NA	0
SRR8559620	2	M	MSW/WSM	Urethra	Australia	Victoria	No	No	0	0	0	0	0	0	0	0	1	0	NA	0
SRR8559621	2	M	MSM	Rectum	Australia	Victoria	No	No	0	0	0	0	0	0	0	1	1	0	NA	0
SRR8559622	2	M	MSM	Urethra	Australia	Victoria	No	NA	0	0	0	0	0	0	0	1	NA	0	NA	0
SRR8559623	2	M	NA	Urethra	Australia	Victoria	NA	NA	0	0	0	0	0	0	0	0	1	0	NA	0
SRR8559624	2	W	MSW/WSM	Cervix	Australia	Victoria	NA	NA	0	0	0	0	0	0	0	0	0	0	NA	0
SRR8559625	2	M	MSM	Urethra	Australia	Victoria	No	No	0	0	0	0	0	0	0	1	1	0	NA	0
SRR8559626	2	W	MSW/WSM	Cervix	Australia	Victoria	NA	No	0	0	0	0	0	0	0	0	0	0	NA	0
SRR8559627	2	M	MSW/WSM	Pharynx	Australia	Victoria	No	No	0	0	0	0	0	0	0	0	0	0	NA	0
SRR8559628	2	M	MSW/WSM	Urethra	Australia	Victoria	No	No	0	0	0	0	0	0	0	0	0	0	NA	0
SRR8559629	2	M	MSW/WSM	Urethra	Australia	Victoria	NA	NA	0	0	0	0	0	0	0	0	0	0	NA	0
SRR8559630	2	W	MSW/WSM	Cervix	Australia	Victoria	NA	NA	0	0	0	0	0	0	0	0	0	0	NA	0
SRR8559631	2	M	MSM	Urethra	Australia	Victoria	No	No	0	0	0	0	0	0	0	1	0	0	NA	0
SRR8559632	2	W	MSW/WSM	Cervix	Australia	Victoria	No	No	0	0	0	0	0	0	0	0	0	0	NA	0
SRR8559633	2	M	NA	Urethra	Australia	Victoria	NA	NA	0	0	0	0	0	0	0	0	1	0	NA	0
SRR8559634	2	M	MSM	Urethra	Australia	Victoria	No	Yes	0	0	0	0	0	0	0	1	0	0	NA	0
SRR8559635	2	M	MSM	Rectum	Australia	Victoria	No	No	0	0	0	0	0	0	0	0	1	0	NA	0
SRR8559636	2	M	MSM	Rectum	Australia	Victoria	No	No	0	0	0	0	0	0	0	1	NA	0	NA	0
SRR8559637	2	M	MSM	Rectum	Australia	Victoria	NA	Yes	0	0	0	0	0	0	0	0	1	0	NA	0
SRR8559638	2	M	MSM	Rectum	Australia	Victoria	No	No	0	0	0	0	0	0	0	0	0	0	NA	0
SRR8559639	2	M	MSM	Rectum	Australia	Victoria	Yes	No	0	0	0	0	0	0	0	1	0	0	NA	0
SRR8559640	2	M	MSM	Urethra	Australia	Victoria	No	No	0	0	0	0	0	0	0	0	1	0	NA	0
SRR8559641	2	M	MSM	Urethra	Australia	Victoria	No	No	0	0	0	0	0	0	0	0	1	0	NA	0
SRR8559642	2	M	MSM	Pharynx	Australia	Victoria	No	No	0	1	1	0	0	0	0	1	1	0	NA	0
SRR8559643	2	M	MSM	Pharynx	Australia	Victoria	No	NA	0	0	0	0	0	0	0	0	0	0	NA	0
SRR8559644	2	NA	NA	Cervix	Australia	Victoria	No	No	0	0	0	0	0	0	0	1	0	0	NA	0
SRR8559645	2	W	MSW/WSM	Cervix	Australia	Victoria	NA	NA	0	0	0	0	0	0	0	0	0	0	NA	0
SRR8559646	2	M	NA	Urethra	Australia	Victoria	NA	NA	0	0	0	0	0	0	0	0	1	0	NA	0
SRR8559647	2	M	NA	Rectum	Australia	Victoria	No	No	0	0	0	0	0	0	0	0	0	0	NA	0
SRR8559648	2	M	NA	Urethra	Australia	Victoria	NA	NA	0	0	0	0	0	0	0	0	1	0	NA	0
SRR8559649	2	M	MSM	Rectum	Australia	Victoria	No	No	0	0	0	0	0	0	0	1	1	0	NA	0
SRR8559650	2	M	MSW/WSM	Urethra	Australia	Victoria	Yes	NA	0	0	0	0	0	0	0	1	NA	0	NA	0
SRR8559651	2	M	MSM	Rectum	Australia	Victoria	No	No	0	0	0	0	0	0	0	0	1	0	NA	0
SRR8559652	2	M	MSW/WSM	Urethra	Australia	Victoria	Yes	No	0	0	0	0	0	0	0	1	0	0	NA	0
SRR8559653	2	W	MSW/WSM	Cervix	Australia	Victoria	NA	NA	0	0	0	0	0	0	0	1	0	0	NA	0
SRR8559654	2	M	MSM	Urethra	Australia	Victoria	No	No	0	0	0	0	0	0	0	0	1	0	NA	0
SRR8559655	2	M	MSM	Rectum	Australia	Victoria	No	No	0	0	0	0	0	0	0	1	1	0	NA	0
SRR8559656	2	M	MSM	Pharynx	Australia	Victoria	No	No	0	0	0	0	0	0	0	0	0	0	NA	0
SRR8559657	2	M	MSW/WSM	NA	Australia	Victoria	No	No	0	0	0	0	0	0	0	1	NA	0	NA	0
SRR8559658	2	M	MSM	Pharynx	Australia	Victoria	No	No	0	0	0	0	0	0	0	0	1	0	NA	0
SRR8559659	2	M	MSM	Pharynx	Australia	Victoria	No	No	0	0	0	0	0	0	0	0	1	0	NA	0
SRR8559660	2	M	MSM	Rectum	Australia	Victoria	No	No	0	0	0	0	0	0	0	0	0	0	NA	0
SRR8559661	2	M	MSM	Rectum	Australia	Victoria	No	No	0	0	0	0	0	0	0	1	NA	0	NA	0
SRR8559662	2	M	MSM	Urethra	Australia	Victoria	No	No	0	0	0	0	0	0	0	1	0	0	NA	0
SRR8559663	2	M	MSM	Urethra	Australia	Victoria	No	No	0	0	0	0	0	0	0	0	1	0	NA	0
SRR8559664	2	M	MSM	Urethra	Australia	Victoria	No	No	0	0	0	0	0	0	0	0	1	0	NA	0
SRR8559665	2	M	MSW/WSM	Urethra	Australia	Victoria	NA	NA	0	0	0	0	0	0	0	1	1	0	NA	0
SRR8559666	2	M	NA	Urethra	Australia	Victoria	NA	NA	0	0	0	0	0	0	0	0	0	0	NA	0
SRR8559667	2	M	NA	Urethra	Australia	Victoria	No	No	0	0	0	0	0	0	0	0	0	0	NA	0
SRR8559668	2	M	MSM	Pharynx	Australia	Victoria	No	No	0	0	0	0	0	0	0	0	1	0	NA	0
SRR8559669	2	M	MSM	Pharynx	Australia	Victoria	No	No	0	0	0	0	0	0	0	1	1	0	NA	0
SRR8559670	2	M	MSW/WSM	Urethra	Australia	Victoria	No	No	0	0	0	0	0	0	0	0	1	0	NA	0
SRR8559671	2	M	MSM	Rectum	Australia	Victoria	No	No	0	0	0	0	0	0	0	0	1	0	NA	0
SRR8559672	2	M	MSM	Rectum	Australia	Victoria	No	No	0	0	0	0	0	0	0	0	1	0	NA	0
SRR8559673	2	M	MSM	Urethra	Australia	Victoria	No	No	0	0	0	0	0	0	0	1	1	0	NA	0
SRR8559674	2	M	MSM	Rectum	Australia	Victoria	No	Yes	0	0	0	0	0	0	0	0	1	0	NA	0
SRR8559675	2	M	MSM	Urethra	Australia	Victoria	NA	No	0	0	0	0	0	0	0	1	0	0	NA	0
SRR8559676	2	M	MSM	Urethra	Australia	Victoria	No	NA	0	0	0	0	0	0	0	0	0	0	NA	0
SRR8559677	2	M	NA	Urethra	Australia	Victoria	NA	NA	0	0	1	0	0	0	0	1	1	0	NA	0
SRR8559678	2	M	MSW/WSM	Urethra	Australia	Victoria	No	No	0	0	0	0	0	0	0	0	0	0	NA	0
SRR8559679	2	M	MSW/WSM	Urethra	Australia	Victoria	Yes	No	0	0	0	0	0	0	0	1	NA	0	NA	0
SRR8559680	2	M	MSM	Pharynx	Australia	Victoria	No	No	0	0	0	0	0	0	0	0	0	0	NA	0
SRR8559681	2	M	MSM	Urethra	Australia	Victoria	No	No	0	0	0	0	0	0	0	1	NA	0	NA	0
SRR8559682	2	W	MSW/WSM	Cervix	Australia	Victoria	NA	No	0	0	0	0	0	0	0	1	0	0	NA	0
SRR8559683	2	M	MSM	Pharynx	Australia	Victoria	No	No	0	0	0	0	0	0	0	1	1	0	NA	0
SRR8559684	2	M	MSM	Pharynx	Australia	Victoria	No	No	0	0	0	0	0	0	0	1	0	0	NA	0
SRR8559685	2	M	MSM	Urethra	Australia	Victoria	No	No	0	0	0	0	0	0	0	0	1	0	NA	0
SRR8559686	2	M	MSM	Rectum	Australia	Victoria	No	No	0	0	0	0	0	0	0	0	0	0	NA	0
SRR8559687	2	M	MSM	Rectum	Australia	Victoria	No	No	0	0	0	0	0	0	0	1	1	0	NA	0
SRR8559688	2	M	MSM	Pharynx	Australia	Victoria	No	No	0	0	0	0	0	0	0	0	1	0	NA	0
SRR8559689	2	M	MSM	Rectum	Australia	Victoria	No	No	1	0	0	0	0	0	0	1	1	0	NA	0
SRR8559690	2	M	MSM	Rectum	Australia	Victoria	No	No	0	0	0	0	0	0	0	0	0	0	NA	0
SRR8559691	2	W	MSW/WSM	Cervix	Australia	Victoria	NA	No	0	0	0	0	0	0	0	0	0	0	NA	0
SRR8559692	2	M	NA	Urethra	Australia	Victoria	NA	NA	0	0	0	0	0	0	0	0	1	0	NA	0
SRR8559693	2	M	NA	Urethra	Australia	Victoria	NA	NA	0	0	0	0	0	0	0	1	0	0	NA	0
SRR8559694	2	W	MSW/WSM	Cervix	Australia	Victoria	NA	NA	0	0	0	0	0	0	0	1	NA	0	NA	0
SRR8559695	2	M	MSW/WSM	NA	Australia	Victoria	No	No	0	0	0	0	0	0	0	1	0	0	NA	0
SRR8559696	2	M	MSM	Rectum	Australia	Victoria	No	No	0	0	0	0	0	0	0	0	0	0	NA	0
SRR8559697	2	M	MSM	Rectum	Australia	Victoria	No	No	0	0	0	0	0	0	0	0	0	0	NA	0
SRR8559698	2	M	NA	Pharynx	Australia	Victoria	NA	NA	0	0	0	0	0	0	0	0	NA	0	NA	0
SRR8559699	2	M	MSM	Rectum	Australia	Victoria	No	No	0	0	0	0	0	0	0	0	1	0	NA	0
SRR8559700	2	M	MSM	Rectum	Australia	Victoria	No	No	0	0	0	0	0	0	0	1	1	0	NA	0
SRR8559701	2	M	MSM	Urethra	Australia	Victoria	No	No	0	0	0	0	0	0	0	0	0	0	NA	0
SRR8559702	2	M	MSM	Rectum	Australia	Victoria	No	No	0	0	0	0	0	0	0	1	1	0	NA	0
SRR8559703	2	M	MSM	Urethra	Australia	Victoria	NA	No	0	0	0	0	0	0	0	1	1	0	NA	0
SRR8559704	2	M	MSW/WSM	Urethra	Australia	Victoria	Yes	No	0	0	0	0	0	0	0	1	0	0	NA	0
SRR8559705	2	M	MSM	Rectum	Australia	Victoria	No	No	0	0	0	0	0	0	0	0	1	0	NA	0
SRR8559706	2	M	MSM	Rectum	Australia	Victoria	No	NA	0	0	0	0	0	0	0	0	1	0	NA	0
SRR8559707	2	M	MSM	Rectum	Australia	Victoria	Yes	NA	0	0	0	0	0	0	0	0	1	0	NA	0
SRR8559708	2	M	MSM	Urethra	Australia	Victoria	No	NA	0	0	0	0	0	0	0	0	0	0	NA	0
SRR8559709	2	W	MSW/WSM	Cervix	Australia	Victoria	No	No	0	0	0	0	0	0	0	0	1	0	NA	0
SRR8559710	2	M	MSM	Rectum	Australia	Victoria	No	No	0	0	0	0	0	0	0	1	1	0	NA	0
SRR8559711	2	M	MSM	Rectum	Australia	Victoria	No	No	0	0	0	0	0	0	0	0	0	0	NA	0
SRR8559712	2	M	MSM	Urethra	Australia	Victoria	No	No	0	0	0	0	0	0	0	0	0	0	NA	0
SRR8559713	2	M	MSM	Pharynx	Australia	Victoria	No	No	0	0	0	0	0	0	0	1	1	0	NA	0
SRR8559714	2	M	MSM	Urethra	Australia	Victoria	No	No	0	0	0	0	0	0	0	0	0	0	NA	0
SRR8559715	2	M	MSM	Rectum	Australia	Victoria	No	No	0	0	0	0	0	0	0	0	1	0	NA	0
SRR8559716	2	M	MSM	Urethra	Australia	Victoria	No	No	0	0	0	0	0	0	0	0	1	0	NA	0
SRR8559717	2	M	MSW/WSM	Urethra	Australia	Victoria	No	NA	0	0	0	0	0	0	0	0	0	0	NA	0
SRR8559718	2	M	NA	Rectum	Australia	Victoria	NA	NA	0	0	0	0	0	0	0	0	1	0	NA	0
SRR8559719	2	M	MSM	Rectum	Australia	Victoria	No	No	0	0	0	0	0	0	0	1	1	0	NA	0
SRR8559720	2	W	MSW/WSM	Cervix	Australia	Victoria	No	No	0	0	0	0	0	0	0	0	1	0	NA	0
SRR8559721	2	M	NA	Rectum	Australia	Victoria	No	No	0	0	0	0	0	0	0	0	1	0	NA	0
SRR8559722	2	M	MSW/WSM	Urethra	Australia	Victoria	No	No	0	0	0	0	0	0	0	0	0	0	NA	0
SRR8559723	2	M	MSW/WSM	NA	Australia	Victoria	No	No	0	0	0	0	0	0	0	0	0	0	NA	0
SRR8559724	2	M	MSM	Urethra	Australia	Victoria	No	No	0	0	0	0	0	0	0	0	1	0	NA	0
SRR8559725	2	M	MSM	Rectum	Australia	Victoria	No	No	0	0	0	0	0	0	0	0	0	0	NA	0
SRR8559726	2	M	MSM	Urethra	Australia	Victoria	No	No	0	0	0	0	0	0	0	0	1	0	NA	0
SRR8559727	2	M	MSM	Pharynx	Australia	Victoria	No	No	0	0	0	0	0	0	0	0	1	0	NA	0
SRR8559728	2	M	MSM	Pharynx	Australia	Victoria	No	No	0	0	0	0	0	0	0	0	1	0	NA	0
SRR8559729	2	M	MSM	Urethra	Australia	Victoria	No	No	0	0	0	0	0	0	0	0	1	0	NA	0
SRR8559730	2	M	MSM	Urethra	Australia	Victoria	No	No	0	0	0	0	0	0	0	0	1	0	NA	1
SRR8559731	2	M	MSW/WSM	Urethra	Australia	Victoria	No	NA	0	0	0	0	0	0	0	0	0	0	NA	0
SRR8559732	2	W	MSW/WSM	Cervix	Australia	Victoria	NA	NA	0	0	0	0	0	0	0	0	0	0	NA	0
SRR8559733	2	M	NA	Urethra	Australia	Victoria	NA	NA	0	0	0	0	0	0	0	0	1	0	NA	1
SRR8559734	2	M	NA	Urethra	Australia	Victoria	NA	NA	0	0	0	0	0	0	0	1	NA	0	NA	0
SRR8559735	2	M	MSM	Rectum	Australia	Victoria	No	No	0	0	0	0	0	0	0	1	1	0	NA	0
SRR8559736	2	M	MSM	Pharynx	Australia	Victoria	No	No	0	0	0	0	0	0	0	1	1	0	NA	0
SRR8559737	2	M	MSM	Rectum	Australia	Victoria	No	Yes	0	0	0	0	0	0	0	0	1	0	NA	0
SRR8559738	2	M	NA	Urethra	Australia	Victoria	NA	NA	0	0	0	0	0	0	0	0	0	0	NA	0
SRR8559739	2	M	MSM	Urethra	Australia	Victoria	No	No	0	0	0	0	0	0	0	0	1	0	NA	0
SRR8559740	2	M	MSM	Urethra	Australia	Victoria	No	No	0	0	0	0	0	0	0	1	0	0	NA	0
SRR8559741	2	M	MSM	Rectum	Australia	Victoria	No	No	0	0	0	0	0	0	0	1	NA	0	NA	0
SRR8559742	2	M	MSM	Pharynx	Australia	Victoria	No	Yes	0	0	0	0	0	0	0	0	1	0	NA	0
SRR8559743	2	M	MSM	Rectum	Australia	Victoria	No	No	0	0	0	0	0	0	0	0	1	0	NA	0
SRR8559744	2	M	MSM	Urethra	Australia	Victoria	No	No	0	0	1	0	0	0	0	1	0	0	NA	0
SRR8559745	2	M	MSM	Rectum	Australia	Victoria	No	No	0	0	0	0	0	0	0	1	0	0	NA	0
SRR8559746	2	M	MSM	Urethra	Australia	Victoria	No	No	0	0	0	0	0	0	0	0	1	0	NA	0
SRR8559747	2	W	MSW/WSM	Cervix	Australia	Victoria	No	No	0	0	0	0	0	0	0	1	0	0	NA	0
SRR8559748	2	M	MSM	Urethra	Australia	Victoria	No	No	0	0	0	0	0	0	0	1	0	0	NA	0
SRR8559749	2	M	MSM	Pharynx	Australia	Victoria	No	No	0	0	0	0	0	0	0	1	1	0	NA	0
SRR8559750	2	M	MSM	Rectum	Australia	Victoria	No	No	0	0	0	0	0	0	0	0	0	0	NA	0
SRR8559751	2	M	MSM	Urethra	Australia	Victoria	No	No	0	0	0	0	0	0	0	0	1	0	NA	0
SRR8559752	2	M	MSM	Pharynx	Australia	Victoria	No	No	0	0	0	0	0	0	0	1	1	0	NA	0
SRR8559753	2	M	MSM	Pharynx	Australia	Victoria	No	No	0	0	0	0	0	0	0	0	1	0	NA	0
SRR8559754	2	M	MSM	Pharynx	Australia	Victoria	No	No	0	0	0	0	0	0	0	1	0	0	NA	0
SRR8559755	2	W	MSW/WSM	Cervix	Australia	Victoria	No	NA	0	0	0	0	0	0	0	0	0	0	NA	0
SRR8559756	2	M	NA	Urethra	Australia	Victoria	NA	NA	0	0	0	0	0	0	0	0	0	0	NA	0
SRR8559757	2	M	MSM	Urethra	Australia	Victoria	No	No	0	0	0	0	0	0	0	0	0	0	NA	0
SRR8559758	2	M	MSW/WSM	Urethra	Australia	Victoria	No	No	0	0	0	0	0	0	0	0	0	0	NA	0
SRR8559759	2	M	MSM	Rectum	Australia	Victoria	No	No	0	0	0	0	0	0	0	1	0	0	NA	0
SRR8559760	2	M	MSM	Rectum	Australia	Victoria	No	No	0	0	0	0	0	0	0	0	0	0	NA	0
SRR8559761	2	M	MSM	Pharynx	Australia	Victoria	No	No	0	0	0	0	0	0	0	1	NA	0	NA	0
SRR8559762	2	M	MSM	Rectum	Australia	Victoria	No	Yes	0	0	0	0	0	0	0	0	0	0	NA	0
SRR8559763	2	M	MSW/WSM	Urethra	Australia	Victoria	Yes	No	0	0	0	0	0	0	0	1	0	0	NA	0
SRR8559764	2	M	MSW/WSM	Urethra	Australia	Victoria	Yes	NA	1	0	0	0	0	0	0	1	NA	0	NA	0
SRR8559765	2	M	MSM	Rectum	Australia	Victoria	No	No	0	0	0	0	0	0	0	1	1	0	NA	0
SRR8559766	2	M	MSM	Rectum	Australia	Victoria	No	No	0	0	0	0	0	0	0	0	0	0	NA	0
SRR8559767	2	M	MSM	Pharynx	Australia	Victoria	No	NA	0	0	0	0	0	0	0	0	1	0	NA	0
SRR8559768	2	M	MSM	Rectum	Australia	Victoria	No	No	0	0	0	0	0	0	0	1	0	0	NA	0
SRR8559769	2	M	MSM	Pharynx	Australia	Victoria	No	No	0	0	0	0	0	0	0	0	1	0	NA	0
SRR8559770	2	M	NA	Urethra	Australia	Victoria	NA	NA	0	0	0	0	0	0	0	0	1	0	NA	0
SRR8559771	2	M	MSM	Rectum	Australia	Victoria	No	No	0	0	0	0	0	0	0	0	1	0	NA	1
SRR8559772	2	W	MSW/WSM	Cervix	Australia	Victoria	No	No	0	0	0	0	0	0	0	1	0	0	NA	0
SRR8559773	2	W	MSW/WSM	Pharynx	Australia	Victoria	No	Yes	0	1	0	0	0	0	0	0	0	0	NA	0
SRR8559774	2	M	MSM	Pharynx	Australia	Victoria	No	No	0	0	0	0	0	0	0	0	1	0	NA	0
SRR8559775	2	W	MSW/WSM	Cervix	Australia	Victoria	No	No	0	0	0	0	0	0	0	0	1	0	NA	0
SRR8559776	2	M	MSM	Urethra	Australia	Victoria	No	No	0	0	0	0	0	0	0	0	0	0	NA	0
SRR8559777	2	M	MSM	Rectum	Australia	Victoria	No	No	0	0	0	0	0	0	0	0	1	0	NA	1
SRR8559778	2	M	MSM	Urethra	Australia	Victoria	No	No	0	0	0	0	0	0	0	1	NA	0	NA	0
SRR8559779	2	W	MSW/WSM	Cervix	Australia	Victoria	No	No	0	0	0	0	0	0	0	0	0	0	NA	0
SRR8559780	2	W	MSW/WSM	Pharynx	Australia	Victoria	No	No	0	0	0	0	0	0	0	0	1	0	NA	0
SRR8559781	2	M	NA	Urethra	Australia	Victoria	No	NA	0	0	0	0	0	0	0	1	1	0	NA	0
SRR8559782	2	M	NA	Urethra	Australia	Victoria	No	No	0	0	0	0	0	0	0	0	0	0	NA	0
SRR8559783	2	M	MSM	Pharynx	Australia	Victoria	No	No	0	0	0	0	0	0	0	1	1	0	NA	0
SRR8559784	2	M	MSM	Urethra	Australia	Victoria	No	No	0	0	0	0	0	0	0	0	0	0	NA	0
SRR8559785	2	W	MSW/WSM	Cervix	Australia	Victoria	No	NA	0	0	0	0	0	0	0	1	NA	0	NA	0
SRR8559786	2	M	MSW/WSM	Pharynx	Australia	Victoria	No	NA	0	0	0	0	0	0	0	1	0	0	NA	0
SRR8559787	2	M	MSW/WSM	Urethra	Australia	Victoria	Yes	No	0	0	0	0	0	0	0	0	0	0	NA	0
SRR8559788	2	M	MSM	NA	Australia	Victoria	No	No	0	1	0	0	0	0	0	0	0	0	NA	1
SRR8559789	2	W	MSW/WSM	Cervix	Australia	Victoria	No	No	0	0	0	0	0	0	0	0	0	0	NA	0
SRR8559790	2	M	MSM	Pharynx	Australia	Victoria	No	No	0	0	0	0	0	0	0	0	0	0	NA	0
SRR8559791	2	M	MSM	Pharynx	Australia	Victoria	No	No	0	0	0	0	0	0	0	0	1	0	NA	0
SRR8559792	2	M	MSM	Rectum	Australia	Victoria	No	No	0	0	0	0	0	0	0	0	1	0	NA	0
SRR8559793	2	M	MSM	Rectum	Australia	Victoria	No	No	0	0	0	0	0	0	0	0	0	0	NA	0
SRR8559794	2	M	MSM	Urethra	Australia	Victoria	No	No	0	0	0	0	0	0	0	0	0	0	NA	0
SRR8559795	2	M	MSM	Urethra	Australia	Victoria	No	No	0	0	0	0	0	0	0	0	1	0	NA	0
SRR8559796	2	M	MSM	Urethra	Australia	Victoria	No	No	0	0	0	0	0	0	0	0	0	0	NA	0
SRR8559797	2	W	MSW/WSM	Cervix	Australia	Victoria	No	No	0	0	0	0	0	0	0	0	0	0	NA	0
SRR8559798	2	M	MSM	Urethra	Australia	Victoria	No	No	0	0	0	0	0	0	0	0	1	0	NA	0
SRR8559799	2	M	MSM	Pharynx	Australia	Victoria	No	No	0	0	0	0	0	0	0	1	NA	0	NA	0
SRR8559800	2	M	MSM	Rectum	Australia	Victoria	No	No	0	0	0	0	0	0	0	1	1	0	NA	0
SRR8559801	2	M	MSM	Rectum	Australia	Victoria	Yes	No	0	0	0	0	0	0	0	1	1	0	NA	0
SRR8559802	2	M	MSM	Pharynx	Australia	Victoria	No	No	0	0	0	0	0	0	0	1	0	0	NA	0
SRR8559803	2	M	MSM	Pharynx	Australia	Victoria	No	No	0	0	0	0	0	0	0	0	0	0	NA	0
SRR8559804	2	M	NA	Urethra	Australia	Victoria	NA	NA	0	0	0	0	0	0	0	0	0	0	NA	0
SRR8559805	2	W	MSW/WSM	Cervix	Australia	Victoria	NA	NA	0	0	0	0	0	0	0	0	0	0	NA	0
SRR8559806	2	M	MSM	Rectum	Australia	Victoria	No	No	0	0	0	0	0	0	0	0	1	0	NA	0
SRR8559807	2	M	MSM	Urethra	Australia	Victoria	No	No	0	0	0	0	0	0	0	1	NA	0	NA	0
SRR8559808	2	M	NA	Urethra	Australia	Victoria	NA	NA	0	0	0	0	0	0	0	0	0	0	NA	0
SRR8559809	2	M	NA	Urethra	Australia	Victoria	NA	NA	0	0	0	0	0	0	0	1	1	0	NA	0
SRR8559810	2	M	NA	Rectum	Australia	Victoria	NA	NA	0	0	0	0	0	0	0	0	1	0	NA	0
SRR8559811	2	M	MSM	Urethra	Australia	Victoria	No	No	0	0	0	0	0	0	0	0	1	0	NA	0
SRR8559812	2	M	MSM	Rectum	Australia	Victoria	No	No	0	0	0	0	0	0	0	1	NA	0	NA	0
SRR8559813	2	M	MSM	Urethra	Australia	Victoria	No	No	0	0	0	0	0	0	0	1	NA	0	NA	0
SRR8559814	2	M	MSM	Urethra	Australia	Victoria	No	No	0	0	0	0	0	0	0	1	0	0	NA	0
SRR8559815	2	W	MSW/WSM	Cervix	Australia	Victoria	No	No	0	0	0	0	0	0	0	0	0	0	NA	0
SRR8559816	2	M	MSM	Rectum	Australia	Victoria	No	No	0	0	0	0	0	0	0	0	1	0	NA	0
SRR8559817	2	M	MSM	Rectum	Australia	Victoria	No	No	0	0	0	0	0	0	0	0	1	0	NA	0
SRR8559818	2	M	MSM	Urethra	Australia	Victoria	No	No	0	0	0	0	0	0	0	0	1	0	NA	0
SRR8559819	2	M	MSM	Pharynx	Australia	Victoria	No	No	0	0	0	0	0	0	0	0	1	0	NA	0
SRR8559820	2	M	MSM	Urethra	Australia	Victoria	No	No	0	0	0	0	0	0	0	1	1	0	NA	0
SRR8559821	2	M	MSM	Urethra	Australia	Victoria	No	No	1	0	0	0	0	0	0	0	0	0	NA	0
SRR8559822	2	W	MSW/WSM	Cervix	Australia	Victoria	No	No	0	0	0	0	0	0	0	0	0	0	NA	0
SRR8559823	2	M	NA	Urethra	Australia	Victoria	NA	NA	0	0	0	0	0	0	0	0	1	0	NA	0
SRR8559824	2	M	MSM	Urethra	Australia	Victoria	NA	No	0	0	0	0	0	0	0	0	1	0	NA	0
SRR8559825	2	M	NA	Urethra	Australia	Victoria	NA	NA	0	0	0	0	0	0	0	0	0	0	NA	0
SRR8559826	2	M	MSM	Urethra	Australia	Victoria	No	No	0	0	0	0	0	0	0	0	0	0	NA	0
SRR8559827	2	M	MSM	Rectum	Australia	Victoria	NA	No	0	0	0	0	0	0	0	0	1	0	NA	1
SRR8559828	2	M	MSM	Pharynx	Australia	Victoria	No	No	0	0	0	0	0	0	0	0	1	0	NA	0
SRR8559829	2	M	MSM	Rectum	Australia	Victoria	No	No	0	0	0	0	0	0	0	0	1	0	NA	0
SRR8559830	2	M	MSM	Rectum	Australia	Victoria	NA	No	0	0	0	0	0	0	0	1	NA	0	NA	0
SRR8559831	2	M	MSM	Pharynx	Australia	Victoria	No	No	0	0	0	0	0	0	0	0	1	0	NA	0
SRR8559832	2	M	MSM	Pharynx	Australia	Victoria	No	No	0	0	0	0	0	0	0	0	0	0	NA	0
SRR8559833	2	M	MSM	Rectum	Australia	Victoria	No	No	0	0	0	0	0	0	0	1	1	0	NA	0
SRR8559834	2	M	MSM	Rectum	Australia	Victoria	No	No	0	0	0	0	0	0	0	0	1	0	NA	0
SRR8559835	2	M	MSM	Urethra	Australia	Victoria	No	No	0	0	0	0	0	0	0	0	1	0	NA	0
SRR8559836	2	M	MSM	Urethra	Australia	Victoria	No	No	0	0	0	0	0	0	0	1	1	0	NA	0
SRR8559837	2	M	MSM	Urethra	Australia	Victoria	Yes	No	0	0	0	0	0	0	0	0	1	0	NA	1
SRR8559838	2	M	MSM	Rectum	Australia	Victoria	No	No	0	0	0	0	0	0	0	0	1	0	NA	0
SRR8559839	2	M	MSM	Urethra	Australia	Victoria	No	No	0	0	0	0	0	0	0	0	1	0	NA	0
SRR8559840	2	M	MSM	Pharynx	Australia	Victoria	NA	No	0	0	0	0	0	0	0	0	0	0	NA	0
SRR8559841	2	M	MSM	Urethra	Australia	Victoria	No	No	0	0	0	0	0	0	0	0	0	0	NA	0
SRR8559842	2	M	MSM	Pharynx	Australia	Victoria	No	No	0	0	0	0	0	0	0	0	0	0	NA	0
SRR8559843	2	M	MSM	Rectum	Australia	Victoria	No	No	0	0	0	0	0	0	0	0	1	0	NA	0
SRR8559844	2	M	MSM	Pharynx	Australia	Victoria	No	No	0	0	0	0	0	0	0	0	1	0	NA	0
SRR8559845	2	M	MSM	Urethra	Australia	Victoria	No	No	0	0	0	0	0	0	0	1	0	0	NA	0
SRR8559846	2	M	NA	Urethra	Australia	Victoria	NA	NA	0	0	0	0	0	0	0	0	0	0	NA	0
SRR8559847	2	M	MSM	Pharynx	Australia	Victoria	No	No	0	0	0	0	0	0	0	0	1	0	NA	0
SRR8559848	2	M	MSM	Rectum	Australia	Victoria	No	No	0	0	0	0	0	0	0	1	0	0	NA	0
SRR8559849	2	M	MSM	Pharynx	Australia	Victoria	NA	No	0	1	0	0	0	0	0	0	0	0	NA	0
SRR8559850	2	M	MSM	Pharynx	Australia	Victoria	No	No	0	0	0	0	0	0	0	0	1	0	NA	0
SRR8559851	2	M	MSM	Pharynx	Australia	Victoria	No	No	0	0	0	0	0	0	0	1	1	0	NA	0
SRR8559852	2	M	MSM	Urethra	Australia	Victoria	No	No	0	0	0	0	0	0	0	0	0	0	NA	0
SRR8559853	2	M	MSM	Urethra	Australia	Victoria	No	No	0	0	0	0	0	0	0	1	1	0	NA	0
SRR8559854	2	M	MSW/WSM	NA	Australia	Victoria	No	No	0	0	0	0	0	0	0	0	0	0	NA	0
SRR8559855	2	M	MSW/WSM	Urethra	Australia	Victoria	No	No	0	0	0	0	0	0	0	0	0	0	NA	0
SRR8559856	2	M	MSW/WSM	Urethra	Australia	Victoria	No	No	0	0	0	0	0	0	0	1	0	0	NA	0
SRR8559857	2	W	MSW/WSM	Cervix	Australia	Victoria	No	No	0	0	0	0	0	0	0	0	0	0	NA	0
SRR8559858	2	M	MSM	Rectum	Australia	Victoria	No	No	0	0	0	0	0	0	0	0	0	0	NA	0
SRR8559859	2	W	MSW/WSM	Cervix	Australia	Victoria	No	No	0	0	0	0	0	0	0	0	0	0	NA	0
SRR8559860	2	M	MSM	Rectum	Australia	Victoria	No	No	0	0	0	0	0	0	0	1	1	0	NA	0
SRR8559861	2	M	MSM	Rectum	Australia	Victoria	No	No	0	0	0	0	0	0	0	0	1	0	NA	0
SRR8559862	2	M	MSM	Pharynx	Australia	Victoria	No	No	0	0	0	0	0	0	0	0	0	0	NA	0
SRR8559863	2	M	MSM	Rectum	Australia	Victoria	No	No	0	0	0	0	0	0	0	1	1	0	NA	0
SRR8559864	2	M	MSM	Rectum	Australia	Victoria	No	No	0	0	0	0	0	0	0	0	1	0	NA	0
SRR8559865	2	M	MSM	Urethra	Australia	Victoria	No	No	0	0	0	0	0	0	0	0	0	0	NA	0
SRR8559866	2	M	MSM	Rectum	Australia	Victoria	No	No	0	0	0	0	0	0	0	1	NA	0	NA	0
SRR8559867	2	M	MSM	Urethra	Australia	Victoria	No	No	0	0	0	0	0	0	0	0	1	0	NA	1
SRR8559868	2	M	MSM	Rectum	Australia	Victoria	No	No	0	0	0	0	0	0	0	0	1	0	NA	0
SRR8559869	2	M	MSM	Pharynx	Australia	Victoria	No	No	0	0	0	0	0	0	0	0	0	0	NA	0
SRR8559870	2	M	MSM	Urethra	Australia	Victoria	No	No	0	0	0	0	0	0	0	0	1	0	NA	0
SRR8559871	2	M	MSM	Pharynx	Australia	Victoria	No	No	0	0	0	0	0	0	0	1	0	0	NA	0
SRR8559872	2	M	MSM	Rectum	Australia	Victoria	No	No	0	0	0	0	0	0	0	0	1	0	NA	0
SRR8559873	2	M	MSM	Rectum	Australia	Victoria	No	No	0	0	0	0	0	0	0	0	1	0	NA	0
SRR8559874	2	M	MSM	Urethra	Australia	Victoria	No	No	0	0	0	0	0	0	0	1	0	0	NA	0
SRR8559875	2	M	MSM	Urethra	Australia	Victoria	No	No	0	0	0	0	0	0	0	0	1	0	NA	0
SRR8559876	2	M	MSM	Urethra	Australia	Victoria	No	No	0	0	0	0	0	0	0	0	1	0	NA	0
SRR8559877	2	M	MSM	Pharynx	Australia	Victoria	No	No	0	0	1	0	0	0	0	1	1	0	NA	0
SRR8559878	2	W	MSW/WSM	Pharynx	Australia	Victoria	No	Yes	0	0	0	0	0	0	1	1	1	0	NA	0
SRR8559879	2	M	MSM	Urethra	Australia	Victoria	No	No	0	0	0	0	0	0	0	0	1	0	NA	0
SRR8559880	2	M	MSM	Urethra	Australia	Victoria	No	No	0	0	0	0	0	0	0	1	NA	0	NA	0
SRR8559881	2	M	MSM	Rectum	Australia	Victoria	No	No	0	0	0	0	0	0	0	0	1	0	NA	0
SRR8559882	2	M	NA	Urethra	Australia	Victoria	NA	NA	0	0	0	0	0	0	0	0	1	0	NA	0
SRR8559883	2	M	MSM	Urethra	Australia	Victoria	No	No	0	0	0	0	0	0	0	0	0	0	NA	0
SRR8559884	2	M	MSW/WSM	Rectum	Australia	Victoria	NA	No	0	0	0	0	0	0	0	0	1	0	NA	0
SRR8559885	2	M	MSM	Urethra	Australia	Victoria	No	No	0	0	0	0	0	0	0	0	1	0	NA	0
SRR8559886	2	M	MSW/WSM	Urethra	Australia	Victoria	NA	No	1	0	0	0	0	0	0	0	0	0	NA	0
SRR8559887	2	M	MSM	Rectum	Australia	Victoria	No	No	0	0	0	0	0	0	0	1	NA	0	NA	0
SRR8559888	2	M	MSM	Urethra	Australia	Victoria	NA	NA	1	0	0	0	0	0	0	0	0	0	NA	0
SRR8559889	2	W	MSW/WSM	Cervix	Australia	Victoria	No	No	0	0	0	0	0	0	0	0	0	0	NA	0
SRR8559890	2	M	MSW/WSM	Urethra	Australia	Victoria	No	No	0	0	0	0	0	0	0	0	0	0	NA	0
SRR8559891	2	M	NA	Urethra	Australia	Victoria	NA	No	0	1	0	0	0	0	0	0	1	0	NA	1
SRR8559892	2	M	NA	Rectum	Australia	Victoria	NA	NA	0	0	0	0	0	0	0	1	1	0	NA	0
SRR8559893	2	M	MSW/WSM	Urethra	Australia	Victoria	No	No	0	0	0	0	0	0	0	1	1	0	NA	0
SRR8559894	2	W	MSW/WSM	Cervix	Australia	Victoria	No	NA	0	0	0	0	0	0	0	0	0	0	NA	0
SRR8559895	2	M	MSM	Rectum	Australia	Victoria	No	NA	0	0	0	0	0	0	0	0	1	0	NA	0
SRR8559896	2	M	MSM	Urethra	Australia	Victoria	No	NA	0	0	1	0	0	0	0	1	1	0	NA	0
SRR8559897	2	M	MSM	Rectum	Australia	Victoria	No	NA	0	0	0	0	0	0	0	1	NA	0	NA	0
SRR8559898	2	M	MSM	Rectum	Australia	Victoria	No	No	0	0	0	0	0	0	0	0	1	0	NA	0
SRR8559899	2	M	MSM	Urethra	Australia	Victoria	No	Yes	0	0	0	0	0	0	0	1	NA	0	NA	0
SRR8559900	2	M	MSM	Rectum	Australia	Victoria	No	NA	0	0	0	0	0	0	0	0	1	0	NA	0
SRR8559901	2	M	MSM	Urethra	Australia	Victoria	No	No	0	0	0	0	0	0	0	0	1	0	NA	0
SRR8559902	2	M	MSM	Urethra	Australia	Victoria	No	No	0	0	0	0	0	0	0	0	0	0	NA	0
SRR8559903	2	M	MSM	Rectum	Australia	Victoria	No	No	0	0	0	0	0	0	0	0	1	0	NA	0
SRR8559904	2	M	MSM	Urethra	Australia	Victoria	Yes	No	0	0	0	0	0	0	0	0	1	0	NA	0
SRR8559905	2	M	MSW/WSM	Urethra	Australia	Victoria	No	No	0	0	0	0	1	0	0	0	0	0	NA	0
SRR8559906	2	M	MSM	Urethra	Australia	Victoria	No	No	0	0	0	0	0	0	0	0	1	0	NA	0
SRR8559907	2	M	MSM	Pharynx	Australia	Victoria	No	No	0	0	0	0	0	0	0	0	1	0	NA	0
SRR8559908	2	M	MSM	Rectum	Australia	Victoria	No	No	0	0	0	0	0	0	0	0	0	0	NA	0
SRR8559909	2	M	MSM	Rectum	Australia	Victoria	No	No	0	0	0	0	0	0	0	0	1	0	NA	0
SRR8559910	2	M	MSW/WSM	Urethra	Australia	Victoria	No	NA	0	0	0	0	0	0	0	1	0	0	NA	0
SRR8559911	2	M	NA	Urethra	Australia	Victoria	NA	NA	0	0	0	0	0	0	0	0	0	0	NA	0
SRR8559912	2	M	NA	Urethra	Australia	Victoria	NA	NA	0	0	0	0	0	0	0	0	1	0	NA	0
SRR8559913	2	M	NA	Urethra	Australia	Victoria	NA	NA	0	0	0	0	0	0	0	1	0	0	NA	0
SRR8559914	2	M	MSM	Urethra	Australia	Victoria	No	No	0	0	0	0	0	0	0	0	1	0	NA	0
SRR8559915	2	M	NA	Urethra	Australia	Victoria	NA	NA	0	0	0	0	0	0	0	0	0	0	NA	0
SRR8559916	2	M	MSM	Urethra	Australia	Victoria	No	No	0	0	0	0	0	0	0	0	1	0	NA	1
SRR8559917	2	M	MSM	Rectum	Australia	Victoria	No	No	0	0	0	0	0	0	0	0	0	0	NA	0
SRR8559918	2	M	MSM	Urethra	Australia	Victoria	No	No	0	0	0	0	0	0	0	0	1	0	NA	0
SRR8559919	2	W	MSW/WSM	Cervix	Australia	Victoria	NA	NA	0	0	0	0	0	0	0	0	0	0	NA	0
SRR8559920	2	M	MSM	Pharynx	Australia	Victoria	No	No	0	0	0	0	0	0	0	0	1	0	NA	0
SRR8559921	2	M	MSW/WSM	Urethra	Australia	Victoria	Yes	No	0	0	0	0	0	0	0	1	NA	0	NA	0
SRR8559922	2	W	MSW/WSM	Cervix	Australia	Victoria	No	Yes	0	0	0	0	0	0	0	0	0	0	NA	0
SRR8559923	2	M	MSW/WSM	Urethra	Australia	Victoria	No	No	0	0	0	0	0	0	0	0	0	0	NA	0
SRR8559924	2	M	MSM	Rectum	Australia	Victoria	No	No	1	0	0	0	0	0	0	0	0	0	NA	0
SRR8559925	2	M	NA	Urethra	Australia	Victoria	No	NA	0	0	0	0	0	0	0	0	1	0	NA	0
SRR8559926	2	W	MSW/WSM	Cervix	Australia	Victoria	No	No	0	0	0	0	0	0	0	1	NA	0	NA	0
SRR8559927	2	M	MSM	Rectum	Australia	Victoria	No	NA	0	0	0	0	0	0	0	0	1	0	NA	0
SRR8559928	2	M	MSW/WSM	Urethra	Australia	Victoria	No	No	0	0	0	0	0	0	0	0	0	0	NA	0
SRR8559929	2	W	MSW/WSM	Cervix	Australia	Victoria	No	NA	0	0	0	0	0	0	0	1	1	0	NA	0
SRR8559930	2	M	MSM	Urethra	Australia	Victoria	No	No	0	0	0	0	0	0	0	0	1	0	NA	0
SRR8559931	2	W	MSW/WSM	Cervix	Australia	Victoria	No	Yes	0	0	0	0	0	0	0	0	1	0	NA	1
SRR8559932	2	M	MSM	Pharynx	Australia	Victoria	No	No	1	0	0	0	0	0	0	1	0	0	NA	0
SRR8559933	2	M	MSM	Rectum	Australia	Victoria	No	NA	0	0	0	0	0	0	0	0	0	0	NA	0
SRR8559934	2	M	MSM	Urethra	Australia	Victoria	No	No	0	0	0	0	0	0	0	0	0	0	NA	0
SRR8559935	2	M	MSM	Rectum	Australia	Victoria	No	No	0	0	0	0	0	0	0	1	NA	0	NA	0
SRR8559936	2	M	MSM	Rectum	Australia	Victoria	No	No	0	0	0	0	0	0	0	1	1	0	NA	0
SRR8559937	2	M	MSM	Rectum	Australia	Victoria	Yes	No	0	0	0	0	0	0	0	1	NA	0	NA	0
SRR8559938	2	M	MSM	Pharynx	Australia	Victoria	No	No	0	0	0	0	0	0	0	0	NA	0	NA	0
SRR8559939	2	M	NA	Rectum	Australia	Victoria	No	NA	0	0	0	0	0	0	0	1	1	0	NA	0
SRR8559940	2	M	NA	Rectum	Australia	Victoria	NA	NA	0	0	0	0	0	0	0	0	1	0	NA	0
SRR8559941	2	M	MSM	Pharynx	Australia	Victoria	No	No	0	0	0	0	0	0	0	0	1	0	NA	0
SRR8559942	2	M	MSM	Urethra	Australia	Victoria	No	No	0	0	0	0	0	0	0	0	0	0	NA	0
SRR8559943	2	M	MSW/WSM	Urethra	Australia	Victoria	No	No	0	0	0	0	0	0	0	1	1	0	NA	0
SRR8559944	2	M	MSM	Pharynx	Australia	Victoria	No	No	0	0	0	0	0	0	0	1	NA	0	NA	0
SRR8559945	2	M	NA	Urethra	Australia	Victoria	Yes	NA	0	0	0	0	0	0	0	1	1	0	NA	0
SRR8559946	2	W	MSW/WSM	Cervix	Australia	Victoria	No	Yes	0	0	0	0	0	0	0	0	0	0	NA	0
SRR8559947	2	M	NA	Urethra	Australia	Victoria	No	No	0	0	0	0	0	0	0	1	NA	0	NA	0
SRR8559948	2	W	MSW/WSM	Pharynx	Australia	Victoria	No	No	0	0	0	0	0	0	0	1	0	0	NA	0
SRR8559949	2	M	MSM	Urethra	Australia	Victoria	No	No	0	0	0	0	0	0	0	1	1	0	NA	0
SRR8559950	2	M	MSM	Rectum	Australia	Victoria	No	No	0	0	0	0	0	0	0	0	1	0	NA	0
SRR8559951	2	M	MSM	Rectum	Australia	Victoria	No	No	0	0	0	0	0	0	0	1	1	0	NA	0
SRR8559952	2	M	MSM	Urethra	Australia	Victoria	No	No	0	0	0	0	0	0	0	0	1	0	NA	0
SRR8559953	2	M	MSM	Rectum	Australia	Victoria	No	No	0	0	0	0	0	0	0	0	1	0	NA	0
SRR8559954	2	W	MSW/WSM	Cervix	Australia	Victoria	No	No	0	0	0	0	0	0	0	0	0	0	NA	0
SRR8559955	2	M	MSM	Urethra	Australia	Victoria	No	No	0	0	0	0	0	0	0	1	1	0	NA	0
SRR8559956	2	M	MSM	Rectum	Australia	Victoria	NA	No	0	0	0	0	0	0	0	1	0	0	NA	0
SRR8559957	2	W	MSW/WSM	NA	Australia	Victoria	NA	NA	0	0	0	0	0	0	0	0	0	0	NA	0
SRR8559958	2	M	MSW/WSM	Urethra	Australia	Victoria	No	No	0	0	0	0	0	0	0	0	0	0	NA	0
SRR8559959	2	M	MSW/WSM	Urethra	Australia	Victoria	No	No	0	0	0	0	0	0	0	0	0	0	NA	0
SRR8559960	2	M	MSM	Pharynx	Australia	Victoria	No	No	0	0	0	0	0	0	0	0	0	0	NA	0
SRR8559961	2	M	MSM	Rectum	Australia	Victoria	No	No	0	0	0	0	0	0	0	0	0	0	NA	0
SRR8559962	2	M	MSM	Rectum	Australia	Victoria	No	No	0	0	0	0	0	0	0	0	0	0	NA	0
SRR8559963	2	M	MSM	Pharynx	Australia	Victoria	No	No	0	0	0	0	0	0	0	1	1	0	NA	0
SRR8559964	2	M	MSM	Rectum	Australia	Victoria	No	No	0	0	0	0	0	0	0	1	NA	0	NA	0
SRR8559965	2	M	MSM	Urethra	Australia	Victoria	No	No	0	0	0	0	0	0	0	0	1	0	NA	0
SRR8559966	2	M	MSM	Urethra	Australia	Victoria	No	No	0	0	0	0	0	0	0	0	0	0	NA	0
SRR8559967	2	M	MSM	Rectum	Australia	Victoria	No	No	0	0	0	0	0	0	0	1	1	0	NA	0
SRR8559968	2	M	MSM	Rectum	Australia	Victoria	No	No	0	0	0	0	0	0	0	1	1	0	NA	0
SRR8560012	2	M	NA	Urethra	Australia	Victoria	NA	NA	0	0	0	0	0	0	0	0	0	0	NA	0
SRR8560013	2	W	MSW/WSM	Cervix	Australia	Victoria	NA	NA	0	0	0	0	0	0	0	1	0	0	NA	0
SRR8560014	2	M	MSM	Pharynx	Australia	Victoria	No	No	0	0	0	0	0	0	0	0	0	0	NA	0
SRR8560015	2	M	NA	Urethra	Australia	Victoria	NA	NA	0	0	0	0	0	0	0	0	0	0	NA	0
SRR8560016	2	M	NA	Urethra	Australia	Victoria	NA	NA	0	0	0	0	0	0	0	1	NA	0	NA	0
SRR8560017	2	W	MSW/WSM	Cervix	Australia	Victoria	No	No	0	0	0	0	0	0	0	0	0	0	NA	0
SRR8560018	2	M	MSM	Rectum	Australia	Victoria	No	No	0	0	0	0	0	0	0	0	0	0	NA	0
SRR8560019	2	M	MSM	Pharynx	Australia	Victoria	No	No	0	0	0	0	0	0	0	0	0	0	NA	0
SRR8560020	2	M	MSM	Urethra	Australia	Victoria	No	No	0	0	0	0	0	0	0	1	1	0	NA	0
SRR8560021	2	M	MSM	Rectum	Australia	Victoria	No	No	0	0	0	0	0	0	0	0	0	0	NA	0
SRR8560022	2	M	MSM	Urethra	Australia	Victoria	No	No	0	0	0	0	0	0	0	0	0	0	NA	0
SRR8560023	2	M	MSW/WSM	Urethra	Australia	Victoria	No	No	0	0	0	0	0	0	0	0	0	0	NA	0
SRR8560024	2	M	MSM	Rectum	Australia	Victoria	No	No	0	0	0	0	0	0	0	0	0	0	NA	0
SRR8560025	2	M	MSW/WSM	Urethra	Australia	Victoria	No	No	0	0	0	0	0	0	0	0	0	0	NA	0
SRR8560026	2	M	MSW/WSM	Urethra	Australia	Victoria	No	NA	0	0	0	0	0	0	0	1	1	0	NA	0
SRR8560027	2	W	MSW/WSM	NA	Australia	Victoria	NA	No	0	0	0	0	0	0	0	1	0	0	NA	0
SRR8560028	2	M	MSM	Pharynx	Australia	Victoria	No	No	0	0	0	0	0	0	0	0	0	0	NA	0
SRR8560029	2	M	MSM	Urethra	Australia	Victoria	No	No	0	0	0	0	0	0	0	0	0	0	NA	0
SRR8560030	2	M	MSM	Pharynx	Australia	Victoria	NA	No	0	0	0	0	0	0	0	0	0	0	NA	0
SRR8560031	2	M	MSM	Rectum	Australia	Victoria	No	No	0	0	0	0	0	0	0	0	0	0	NA	0
SRR8560032	2	M	MSM	Urethra	Australia	Victoria	No	No	0	0	0	0	0	0	0	1	1	0	NA	0
SRR8560033	2	M	MSM	Urethra	Australia	Victoria	No	No	0	0	0	0	0	0	0	1	1	0	NA	0
SRR8560034	2	M	MSM	Rectum	Australia	Victoria	No	No	0	0	0	0	0	0	0	0	0	0	NA	0
SRR8560035	2	M	MSM	Urethra	Australia	Victoria	No	No	0	0	0	0	0	0	0	0	0	0	NA	0
SRR8560036	2	M	MSM	Urethra	Australia	Victoria	NA	No	0	0	0	0	0	0	0	0	0	0	NA	0
SRR8560037	2	M	MSM	Urethra	Australia	Victoria	No	No	0	0	0	0	0	0	0	0	0	0	NA	0
SRR8560038	2	M	MSM	Pharynx	Australia	Victoria	Yes	No	0	0	0	0	0	0	0	0	0	0	NA	0
SRR8560039	2	M	MSM	Urethra	Australia	Victoria	No	No	0	0	0	0	0	0	0	0	0	0	NA	0
SRR8560040	2	M	MSM	Rectum	Australia	Victoria	No	No	0	0	0	0	0	0	0	0	0	0	NA	0
SRR8560041	2	M	MSM	Pharynx	Australia	Victoria	NA	No	0	0	0	0	0	0	0	0	0	0	NA	0
SRR8560042	2	M	MSM	Rectum	Australia	Victoria	No	No	0	0	0	0	0	0	0	0	0	0	NA	0
SRR8560043	2	W	MSW/WSM	Cervix	Australia	Victoria	No	NA	0	0	0	0	0	0	0	0	0	0	NA	0
SRR8560044	2	M	MSM	Pharynx	Australia	Victoria	Yes	No	0	0	0	0	0	0	0	0	0	0	NA	0
SRR8560045	2	M	MSM	Urethra	Australia	Victoria	No	No	0	0	0	0	0	0	0	0	0	0	NA	0
SRR8560046	2	M	MSM	Rectum	Australia	Victoria	No	No	0	0	0	0	0	0	0	0	0	0	NA	0
SRR8560047	2	M	NA	Urethra	Australia	Victoria	No	No	0	0	0	0	0	0	0	0	0	0	NA	0
SRR8560048	2	M	MSM	Urethra	Australia	Victoria	No	No	0	0	0	0	0	0	0	0	0	0	NA	0
SRR8560049	2	M	MSW/WSM	Urethra	Australia	Victoria	No	No	0	0	0	0	0	0	0	0	0	0	NA	0
SRR8560050	2	M	NA	Urethra	Australia	Victoria	NA	NA	0	0	0	0	0	0	0	0	0	0	NA	0
SRR8560051	2	M	MSM	Urethra	Australia	Victoria	No	No	0	0	0	0	0	0	0	1	0	0	NA	0
SRR8560052	2	M	MSM	Urethra	Australia	Victoria	No	No	0	0	0	0	0	0	0	0	0	0	NA	0
SRR8560053	2	M	MSM	Urethra	Australia	Victoria	No	No	0	0	0	0	0	0	0	0	1	0	NA	0
SRR8560054	2	M	MSM	Urethra	Australia	Victoria	No	No	0	0	0	0	0	0	0	0	0	0	NA	0
SRR8560055	2	M	MSM	Pharynx	Australia	Victoria	No	Yes	0	0	0	0	0	0	0	0	1	0	NA	0
SRR8560056	2	M	MSM	Urethra	Australia	Victoria	No	No	0	0	0	0	0	0	0	0	0	0	NA	0
SRR8560057	2	W	MSW/WSM	Cervix	Australia	Victoria	No	No	0	0	0	0	0	0	0	0	0	0	NA	0
SRR8560058	2	M	MSM	Rectum	Australia	Victoria	No	No	0	0	0	0	0	0	0	0	0	0	NA	0
SRR8560059	2	M	MSM	Rectum	Australia	Victoria	NA	No	0	0	0	0	0	0	0	0	0	0	NA	0
SRR8560060	2	M	MSM	Urethra	Australia	Victoria	No	No	0	0	0	0	0	0	0	0	0	0	NA	0
SRR8560061	2	M	MSM	Urethra	Australia	Victoria	No	No	0	0	0	0	0	0	0	0	0	0	NA	0
SRR8560062	2	M	MSM	Urethra	Australia	Victoria	No	No	0	0	0	0	0	0	0	0	1	0	NA	0
SRR8560063	2	M	MSM	Pharynx	Australia	Victoria	No	No	0	0	0	0	0	0	0	0	0	0	NA	0
SRR8560064	2	M	MSM	Rectum	Australia	Victoria	No	No	0	0	0	0	0	0	0	0	0	0	NA	0
SRR8560065	2	M	MSM	Pharynx	Australia	Victoria	No	No	0	0	0	0	0	0	0	0	0	0	NA	0
SRR8560066	2	M	MSM	Urethra	Australia	Victoria	No	No	0	0	0	0	0	0	0	0	0	0	NA	0
SRR8560067	2	M	NA	NA	Australia	Victoria	NA	NA	0	0	0	0	0	0	0	1	NA	0	NA	0
SRR8560068	2	M	MSM	Urethra	Australia	Victoria	No	No	0	0	0	0	0	0	0	0	0	0	NA	0
SRR8560069	2	M	MSM	Pharynx	Australia	Victoria	No	No	0	0	0	0	0	0	0	1	1	0	NA	0
SRR8560070	2	M	MSW/WSM	Urethra	Australia	Victoria	No	No	0	0	0	0	0	0	0	0	0	0	NA	0
SRR8560071	2	M	MSM	Rectum	Australia	Victoria	No	No	0	0	0	0	0	0	0	0	0	0	NA	0
SRR8560072	2	M	MSM	Urethra	Australia	Victoria	NA	No	0	0	0	0	0	0	0	0	0	0	NA	0
SRR8560073	2	M	MSM	Rectum	Australia	Victoria	NA	No	0	0	0	0	0	0	0	0	1	0	NA	0
SRR8560074	2	M	MSM	Rectum	Australia	Victoria	No	No	0	1	0	0	0	0	0	1	0	0	NA	1
SRR8560075	2	M	MSM	Rectum	Australia	Victoria	No	No	0	0	0	0	0	0	0	1	0	0	NA	0
SRR8560076	2	M	MSM	Rectum	Australia	Victoria	No	No	0	0	0	0	0	0	0	0	0	0	NA	0
SRR8560077	2	M	MSW/WSM	Urethra	Australia	Victoria	No	NA	0	0	0	0	0	0	0	0	0	0	NA	0
SRR8560078	2	M	NA	Urethra	Australia	Victoria	NA	NA	0	0	0	0	0	0	0	1	1	0	NA	0
SRR8560079	2	M	MSM	Rectum	Australia	Victoria	No	No	0	0	0	0	0	0	0	0	1	0	NA	0
SRR8560080	2	M	NA	Urethra	Australia	Victoria	NA	NA	0	0	0	0	0	0	0	1	0	0	NA	0
SRR8560081	2	M	MSM	Pharynx	Australia	Victoria	No	No	0	0	0	0	0	0	0	0	0	0	NA	0
SRR8560082	2	M	MSM	Urethra	Australia	Victoria	No	No	0	0	0	0	0	0	0	1	1	0	NA	0
SRR8560083	2	M	MSM	Pharynx	Australia	Victoria	No	No	0	0	0	0	0	0	0	0	0	0	NA	0
SRR8560084	2	W	MSW/WSM	Cervix	Australia	Victoria	No	No	0	0	0	0	0	0	0	0	0	0	NA	0
SRR8560085	2	W	MSW/WSM	Pharynx	Australia	Victoria	NA	NA	0	0	0	0	0	0	0	0	0	0	NA	0
SRR8560086	2	M	MSM	Rectum	Australia	Victoria	No	No	0	0	0	0	0	0	0	0	0	0	NA	0
SRR8560087	2	M	MSM	Pharynx	Australia	Victoria	No	No	0	0	0	0	0	0	0	0	0	0	NA	0
SRR8560088	2	M	MSM	Rectum	Australia	Victoria	No	No	0	0	0	0	0	0	0	0	0	0	NA	0
SRR8560089	2	M	MSM	Rectum	Australia	Victoria	No	No	0	0	0	0	0	0	0	1	NA	0	NA	0
SRR8560090	2	M	MSM	Urethra	Australia	Victoria	NA	No	0	0	0	0	0	0	0	0	0	0	NA	0
SRR8560091	2	W	MSW/WSM	Cervix	Australia	Victoria	NA	NA	0	0	0	0	0	0	0	0	0	0	NA	0
SRR8560092	2	M	MSW/WSM	Urethra	Australia	Victoria	No	No	0	0	0	0	0	0	0	0	0	0	NA	0
SRR8560093	2	M	MSW/WSM	Urethra	Australia	Victoria	NA	No	0	0	0	0	0	0	0	0	0	0	NA	0
SRR8560094	2	M	MSW/WSM	Urethra	Australia	Victoria	No	NA	0	0	0	0	0	0	0	0	1	0	NA	0
SRR8560095	2	M	MSW/WSM	Urethra	Australia	Victoria	No	No	0	0	0	0	0	0	0	0	0	0	NA	0
SRR8560096	2	M	MSM	Rectum	Australia	Victoria	No	No	0	0	0	1	0	0	0	0	0	0	NA	0
SRR8560097	2	M	MSM	Urethra	Australia	Victoria	No	No	0	0	0	0	0	0	0	0	0	0	NA	0
SRR8560098	2	M	MSM	Rectum	Australia	Victoria	No	No	0	0	0	0	0	0	0	0	0	0	NA	0
SRR8560099	2	M	NA	Urethra	Australia	Victoria	NA	NA	0	0	0	0	0	0	0	0	1	0	NA	0
SRR8560100	2	M	MSM	Pharynx	Australia	Victoria	No	No	0	0	0	0	0	0	0	0	1	0	NA	0
SRR8560101	2	M	MSW/WSM	Urethra	Australia	Victoria	Yes	No	0	0	0	0	0	0	0	1	0	0	NA	0
SRR8560102	2	M	MSM	Urethra	Australia	Victoria	No	No	0	1	0	0	0	0	0	0	0	0	NA	1
SRR8560103	2	M	MSM	Rectum	Australia	Victoria	No	No	0	0	0	0	0	0	0	1	NA	0	NA	0
SRR8560104	2	M	MSM	Rectum	Australia	Victoria	No	No	0	0	0	0	0	0	0	0	1	0	NA	0
SRR8560105	2	M	MSM	Rectum	Australia	Victoria	No	No	0	0	0	0	0	0	0	0	0	0	NA	0
SRR8560106	2	W	MSW/WSM	Pharynx	Australia	Victoria	No	No	0	0	0	0	0	0	0	0	0	0	NA	0
SRR8560107	2	M	MSM	Urethra	Australia	Victoria	No	No	0	0	0	0	0	0	0	0	0	0	NA	0
SRR8560108	2	M	MSM	Rectum	Australia	Victoria	No	No	0	0	0	0	0	0	0	0	1	0	NA	0
SRR8560109	2	M	NA	Urethra	Australia	Victoria	NA	NA	0	0	0	0	0	0	0	0	0	0	NA	0
SRR8560110	2	W	MSW/WSM	Cervix	Australia	Victoria	No	NA	0	0	0	0	0	0	0	1	NA	0	NA	0
SRR8560111	2	M	MSM	Urethra	Australia	Victoria	No	No	0	0	0	0	0	0	0	0	0	0	NA	0
SRR8560112	2	M	MSM	Urethra	Australia	Victoria	Yes	No	0	0	0	0	0	0	0	0	0	0	NA	0
SRR8560113	2	M	MSM	Urethra	Australia	Victoria	No	No	0	0	0	0	0	0	0	0	0	0	NA	0
SRR8560114	2	M	MSM	Pharynx	Australia	Victoria	No	No	0	0	0	0	0	0	0	0	0	0	NA	0
SRR8560115	2	W	MSW/WSM	Cervix	Australia	Victoria	NA	NA	0	0	0	0	0	0	0	1	0	0	NA	0
SRR8560116	2	M	MSM	Urethra	Australia	Victoria	No	No	0	0	0	0	0	0	0	0	0	0	NA	0
SRR8560117	2	M	MSM	Urethra	Australia	Victoria	No	No	0	0	0	0	0	0	0	0	0	0	NA	0
SRR8560118	2	M	MSW/WSM	Urethra	Australia	Victoria	No	No	0	0	0	0	0	0	0	1	1	0	NA	0
SRR8560119	2	M	MSM	Urethra	Australia	Victoria	No	No	0	0	0	0	0	0	0	0	0	0	NA	0
SRR8560120	2	W	MSW/WSM	Cervix	Australia	Victoria	NA	No	0	0	0	0	0	0	0	0	1	0	NA	0
SRR8560121	2	M	MSM	Urethra	Australia	Victoria	No	No	0	0	0	0	0	0	0	0	0	0	NA	0
SRR8560122	2	M	MSM	Urethra	Australia	Victoria	No	No	0	0	0	0	0	0	0	0	0	0	NA	0
SRR8560123	2	M	MSM	Urethra	Australia	Victoria	No	No	0	0	0	0	0	0	0	0	0	0	NA	0
SRR8560124	2	M	MSM	Urethra	Australia	Victoria	No	No	0	0	0	0	0	0	0	0	0	0	NA	0
SRR8560125	2	M	MSM	Rectum	Australia	Victoria	No	No	0	0	0	0	0	0	0	0	0	0	NA	0
SRR8560126	2	W	MSW/WSM	Rectum	Australia	Victoria	No	No	0	0	0	0	0	0	0	0	0	0	NA	0
SRR8560127	2	M	MSM	Urethra	Australia	Victoria	No	No	0	0	0	0	0	0	0	0	0	0	NA	0
SRR8560128	2	W	MSW/WSM	Cervix	Australia	Victoria	No	Yes	0	0	0	0	0	0	0	0	1	0	NA	0
SRR8560129	2	M	MSM	Urethra	Australia	Victoria	No	No	0	0	0	0	0	0	0	0	0	0	NA	0
SRR8560130	2	M	MSM	Urethra	Australia	Victoria	Yes	No	0	0	0	0	0	0	0	1	0	0	NA	0
SRR8560131	2	M	MSW/WSM	NA	Australia	Victoria	No	No	0	0	0	0	0	0	0	1	NA	0	NA	0
SRR8560132	2	M	MSM	Pharynx	Australia	Victoria	NA	NA	0	0	0	0	0	0	0	0	0	0	NA	0
SRR8560133	2	M	NA	Urethra	Australia	Victoria	NA	NA	0	0	0	0	0	0	0	0	0	0	NA	0
SRR8560134	2	M	MSW/WSM	Urethra	Australia	Victoria	No	No	0	0	0	0	0	0	0	0	0	0	NA	0
SRR8560135	2	M	NA	Urethra	Australia	Victoria	NA	NA	0	0	0	0	0	0	0	1	NA	0	NA	0
SRR8560136	2	M	MSM	Rectum	Australia	Victoria	No	No	0	0	0	0	0	0	0	0	0	0	NA	0
SRR8560137	2	M	MSM	Pharynx	Australia	Victoria	No	No	0	0	0	0	0	0	0	1	1	0	NA	0
SRR8560138	2	M	MSM	Pharynx	Australia	Victoria	No	Yes	0	0	0	0	0	0	0	1	1	0	NA	0
SRR8560139	2	M	MSM	Urethra	Australia	Victoria	No	No	0	0	0	0	0	0	0	0	0	0	NA	0
SRR8560140	2	M	MSM	Rectum	Australia	Victoria	No	No	0	0	0	0	0	0	0	0	0	0	NA	0
SRR8560141	2	M	MSW/WSM	Urethra	Australia	Victoria	Yes	No	0	0	0	0	0	0	0	0	0	0	NA	0
SRR8560142	2	M	MSM	Rectum	Australia	Victoria	No	No	0	0	0	0	0	0	0	0	0	0	NA	0
SRR8560143	2	M	MSM	Pharynx	Australia	Victoria	No	No	0	0	0	0	0	0	0	0	0	0	NA	0
SRR8560144	2	M	MSM	Pharynx	Australia	Victoria	No	No	0	0	0	0	0	0	0	1	NA	0	NA	0
SRR8560145	2	M	MSW/WSM	Rectum	Australia	Victoria	No	No	0	0	0	0	0	0	0	0	0	0	NA	0
SRR8560146	2	M	MSW/WSM	NA	Australia	Victoria	No	No	0	0	0	0	0	0	0	0	0	0	NA	0
SRR8560147	2	M	MSM	Rectum	Australia	Victoria	No	NA	0	0	0	0	0	0	0	0	0	0	NA	0
SRR8560148	2	M	MSW/WSM	NA	Australia	Victoria	No	No	0	0	0	0	0	0	0	1	0	0	NA	0
SRR8560149	2	M	NA	Rectum	Australia	Victoria	NA	NA	0	0	0	0	0	0	0	0	0	0	NA	0
SRR8560150	2	M	MSW/WSM	Urethra	Australia	Victoria	No	No	0	0	0	0	0	0	0	0	0	0	NA	0
SRR8560151	2	M	MSM	Urethra	Australia	Victoria	No	No	0	0	0	0	0	0	0	0	0	0	NA	0
SRR8560152	2	M	MSM	Rectum	Australia	Victoria	No	No	0	0	0	0	0	0	0	0	0	0	NA	0
SRR8560153	2	W	MSW/WSM	Cervix	Australia	Victoria	No	NA	0	0	0	0	0	0	0	1	1	0	NA	0
SRR8560154	2	M	MSW/WSM	Urethra	Australia	Victoria	Yes	No	0	0	0	0	0	0	0	0	0	0	NA	0
SRR8560155	2	M	MSW/WSM	Urethra	Australia	Victoria	No	No	0	0	0	0	0	0	0	0	0	0	NA	0
SRR8560156	2	M	NA	Urethra	Australia	Victoria	NA	NA	0	0	0	0	0	0	0	0	0	0	NA	0
SRR8560157	2	M	NA	Urethra	Australia	Victoria	NA	NA	0	0	0	0	0	0	0	0	0	0	NA	0
SRR8560158	2	M	MSM	Pharynx	Australia	Victoria	No	No	0	0	0	0	0	0	0	0	1	0	NA	0
SRR8560159	2	M	MSW/WSM	Urethra	Australia	Victoria	No	No	0	0	0	0	0	0	0	0	0	0	NA	0
SRR8560160	2	M	MSM	Urethra	Australia	Victoria	No	No	0	0	0	0	0	0	0	0	1	0	NA	0
SRR8560161	2	M	MSW/WSM	Urethra	Australia	Victoria	No	No	0	0	0	0	0	0	0	1	1	0	NA	0
SRR8560162	2	M	MSM	Urethra	Australia	Victoria	No	No	0	0	0	0	0	0	0	1	1	0	NA	0
SRR8560163	2	W	MSW/WSM	Cervix	Australia	Victoria	No	No	0	0	0	0	0	0	0	0	0	0	NA	0
SRR8560164	2	M	MSM	Rectum	Australia	Victoria	No	No	0	0	0	0	0	0	0	0	0	0	NA	0
SRR8560165	2	M	MSM	Rectum	Australia	Victoria	NA	No	0	0	0	0	0	0	0	0	0	0	NA	0
SRR8560166	2	M	MSM	Urethra	Australia	Victoria	No	No	0	0	0	0	0	0	0	0	0	0	NA	0
SRR8560167	2	M	MSM	Rectum	Australia	Victoria	No	No	0	0	0	0	0	0	0	1	NA	0	NA	0
SRR8560168	2	M	MSM	Pharynx	Australia	Victoria	No	No	0	0	0	0	0	0	0	0	1	0	NA	0
SRR8560169	2	M	MSM	Rectum	Australia	Victoria	No	No	0	0	1	0	0	0	0	1	1	0	NA	0
SRR8560170	2	W	MSW/WSM	Pharynx	Australia	Victoria	No	No	0	0	0	0	0	0	0	1	1	0	NA	0
SRR8560171	2	M	MSM	Urethra	Australia	Victoria	No	No	0	0	0	0	0	0	0	1	1	0	NA	0
SRR8560172	2	M	MSM	Urethra	Australia	Victoria	No	Yes	0	0	0	0	0	0	0	1	0	0	NA	0
SRR8560173	2	M	MSM	Urethra	Australia	Victoria	No	NA	0	0	0	0	0	0	0	0	0	0	NA	0
SRR8560174	2	W	MSW/WSM	Cervix	Australia	Victoria	No	No	0	0	0	0	0	0	0	0	0	0	NA	0
SRR8560175	2	M	MSM	Pharynx	Australia	Victoria	NA	No	0	0	1	0	0	0	0	1	0	0	NA	0
SRR8560176	2	M	MSM	Pharynx	Australia	Victoria	No	No	0	0	0	0	0	0	0	1	0	0	NA	0
SRR8560177	2	M	MSM	Rectum	Australia	Victoria	No	No	0	0	0	0	0	0	0	0	1	0	NA	0
SRR8560178	2	M	MSM	Urethra	Australia	Victoria	No	No	0	0	0	0	0	0	0	0	1	0	NA	0
SRR8560179	2	M	MSM	NA	Australia	Victoria	NA	No	0	0	0	0	0	0	0	0	0	0	NA	0
SRR8560180	2	M	MSM	Urethra	Australia	Victoria	No	No	0	0	0	0	0	0	0	0	0	0	NA	0
SRR8560181	2	M	NA	Urethra	Australia	Victoria	NA	NA	0	0	0	0	0	0	0	0	NA	0	NA	0
SRR8560182	2	M	MSW/WSM	NA	Australia	Victoria	Yes	No	0	0	0	0	0	0	0	1	0	0	NA	0
SRR8560183	2	W	MSW/WSM	NA	Australia	Victoria	No	NA	0	0	0	0	0	0	0	1	0	0	NA	0
SRR8560184	2	M	MSM	Urethra	Australia	Victoria	No	No	0	0	0	0	0	0	0	0	0	0	NA	0
SRR8560185	2	W	MSW/WSM	Cervix	Australia	Victoria	NA	NA	0	0	0	0	0	0	0	0	1	0	NA	0
SRR8560186	2	M	MSM	Urethra	Australia	Victoria	Yes	NA	0	0	0	0	0	0	0	1	NA	0	NA	0
SRR8560187	2	W	MSW/WSM	Pharynx	Australia	Victoria	No	Yes	0	0	0	0	0	0	0	0	1	0	NA	0
SRR8560188	2	M	MSM	Urethra	Australia	Victoria	No	No	0	0	0	0	0	0	0	0	0	0	NA	0
SRR8560189	2	M	NA	Urethra	Australia	Victoria	NA	NA	0	0	0	0	0	0	0	0	0	0	NA	0
SRR8560190	2	M	MSM	Rectum	Australia	Victoria	No	No	0	0	0	0	0	0	0	0	1	0	NA	0
SRR8560191	2	M	MSM	Rectum	Australia	Victoria	No	No	0	0	0	0	0	0	0	0	0	0	NA	0
SRR8560192	2	W	MSW/WSM	Cervix	Australia	Victoria	No	No	0	0	0	0	0	0	0	0	0	0	NA	0
SRR8560193	2	W	MSW/WSM	Cervix	Australia	Victoria	No	NA	0	0	0	0	0	0	0	1	0	0	NA	0
SRR8560194	2	M	MSW/WSM	Urethra	Australia	Victoria	No	No	0	0	0	0	0	0	0	0	1	0	NA	0
SRR8560195	2	M	MSM	Rectum	Australia	Victoria	No	No	0	0	0	0	0	0	0	0	0	0	NA	0
SRR8560196	2	M	MSM	NA	Australia	Victoria	No	NA	0	0	0	0	0	0	0	0	0	0	NA	0
SRR8560197	2	M	MSM	Rectum	Australia	Victoria	No	No	0	0	0	0	0	0	0	0	0	0	NA	0
SRR8560198	2	M	MSW/WSM	NA	Australia	Victoria	No	NA	0	0	0	0	0	0	0	1	1	0	NA	0
SRR8560199	2	M	MSM	Rectum	Australia	Victoria	No	No	0	0	0	0	0	0	0	1	NA	0	NA	0
SRR8560200	2	M	MSM	Pharynx	Australia	Victoria	No	No	0	0	0	0	0	0	0	0	0	0	NA	0
SRR8560201	2	M	MSM	Rectum	Australia	Victoria	No	No	0	0	0	0	0	0	0	1	1	0	NA	0
SRR8560202	2	M	MSM	Urethra	Australia	Victoria	No	No	0	0	0	0	0	0	0	1	NA	0	NA	0
SRR8560203	2	M	MSM	Rectum	Australia	Victoria	No	No	0	0	0	0	0	0	0	1	1	0	NA	0
SRR8560204	2	M	MSM	Pharynx	Australia	Victoria	NA	No	0	0	0	0	0	0	0	0	0	0	NA	0
SRR8560205	2	M	MSW/WSM	Urethra	Australia	Victoria	No	No	0	0	0	0	0	0	0	1	0	0	NA	0
SRR8560206	2	M	MSM	Urethra	Australia	Victoria	No	No	0	0	0	0	0	0	0	0	0	0	NA	0
SRR8560207	2	M	MSM	Rectum	Australia	Victoria	No	NA	0	0	0	0	0	0	0	0	1	0	NA	0
SRR8560208	2	M	MSM	Rectum	Australia	Victoria	NA	No	0	0	0	0	0	0	0	0	0	0	NA	0
SRR8560209	2	W	MSW/WSM	Pharynx	Australia	Victoria	No	Yes	0	0	0	0	0	0	0	0	0	0	NA	0
SRR8560210	2	M	MSM	Urethra	Australia	Victoria	No	No	0	0	0	0	0	0	0	0	0	0	NA	0
SRR8560211	2	M	MSM	Urethra	Australia	Victoria	No	No	0	0	0	0	0	0	0	0	0	0	NA	0
SRR8560212	2	M	MSM	Rectum	Australia	Victoria	No	No	0	0	0	0	0	0	0	0	0	0	NA	0
SRR8560213	2	M	MSM	Rectum	Australia	Victoria	No	No	0	1	0	0	0	0	0	0	0	0	NA	1
SRR8560214	2	M	MSW/WSM	Urethra	Australia	Victoria	No	No	0	1	0	0	0	0	0	0	1	0	NA	1
SRR8560215	2	M	MSM	Urethra	Australia	Victoria	No	No	0	0	0	0	0	0	0	0	0	0	NA	0
SRR8560216	2	M	MSM	Rectum	Australia	Victoria	Yes	No	0	0	0	0	0	0	0	1	1	0	NA	0
SRR8560217	2	M	MSM	Rectum	Australia	Victoria	No	No	0	0	0	0	0	0	0	0	1	0	NA	0
SRR8560218	2	M	MSM	Pharynx	Australia	Victoria	No	No	0	0	0	0	0	0	0	0	0	0	NA	0
SRR8560219	2	M	MSM	Pharynx	Australia	Victoria	No	No	0	0	0	0	0	0	0	1	0	0	NA	0
SRR8560220	2	M	MSM	Rectum	Australia	Victoria	No	No	0	0	0	0	0	0	0	0	0	0	NA	0
SRR8560221	2	M	MSM	Rectum	Australia	Victoria	No	No	0	0	0	0	0	0	0	0	1	0	NA	0
SRR8560222	2	M	MSM	Rectum	Australia	Victoria	Yes	No	0	0	0	0	0	0	0	0	0	0	NA	0
SRR8560223	2	W	MSW/WSM	Cervix	Australia	Victoria	No	No	0	0	0	0	0	0	0	0	0	0	NA	0
SRR8560224	2	M	MSW/WSM	Urethra	Australia	Victoria	No	No	0	0	0	0	0	0	0	0	0	0	NA	0
SRR8560225	2	M	MSW/WSM	Urethra	Australia	Victoria	Yes	No	0	0	0	0	0	0	0	0	0	0	NA	0
SRR8560226	2	M	MSM	Urethra	Australia	Victoria	NA	NA	0	0	0	0	0	0	0	0	1	0	NA	0
SRR8560227	2	M	MSM	Urethra	Australia	Victoria	No	No	0	0	0	0	0	0	0	0	1	0	NA	0
SRR8560228	2	M	MSM	Rectum	Australia	Victoria	No	No	0	0	0	0	0	0	0	0	0	0	NA	0
SRR8560229	2	M	MSM	Urethra	Australia	Victoria	No	No	0	0	0	0	0	0	0	0	1	0	NA	0
SRR8560230	2	M	MSM	Rectum	Australia	Victoria	No	No	0	0	0	0	0	0	0	0	0	0	NA	0
SRR8560231	2	W	MSW/WSM	Cervix	Australia	Victoria	Yes	No	0	0	0	0	0	0	0	1	NA	0	NA	0
SRR8560232	2	M	MSM	Rectum	Australia	Victoria	Yes	NA	0	0	0	0	0	0	0	1	1	0	NA	0
SRR8560233	2	M	MSM	Pharynx	Australia	Victoria	No	No	0	0	0	0	0	0	0	0	0	0	NA	0
SRR8560234	2	W	MSW/WSM	Cervix	Australia	Victoria	NA	Yes	0	0	0	0	0	0	0	0	1	0	NA	0
SRR8560235	2	M	MSM	Urethra	Australia	Victoria	No	No	0	0	0	0	0	0	0	0	0	0	NA	0
SRR8560236	2	M	MSM	Urethra	Australia	Victoria	No	No	0	0	0	0	0	0	0	0	0	0	NA	0
SRR8560237	2	M	MSW/WSM	Urethra	Australia	Victoria	Yes	No	0	0	0	0	0	0	0	0	0	0	NA	0
SRR8560238	2	M	MSM	Rectum	Australia	Victoria	No	No	0	0	0	0	0	0	0	1	1	0	NA	0
SRR8560239	2	M	NA	NA	Australia	Victoria	NA	NA	0	0	0	0	0	0	0	1	0	0	NA	0
SRR8560240	2	M	MSM	Rectum	Australia	Victoria	NA	No	0	0	0	0	0	0	0	0	1	0	NA	0
SRR8560241	2	M	MSW/WSM	Urethra	Australia	Victoria	No	No	0	0	0	0	0	0	0	0	0	0	NA	0
SRR8560242	2	M	MSW/WSM	Urethra	Australia	Victoria	NA	NA	0	0	0	0	0	0	0	1	0	0	NA	0
SRR8560243	2	M	MSM	Rectum	Australia	Victoria	Yes	No	0	0	0	0	0	0	0	1	0	0	NA	0
SRR8560244	2	M	MSM	Rectum	Australia	Victoria	No	No	0	0	0	0	0	0	0	1	NA	0	NA	0
SRR8560245	2	M	NA	Urethra	Australia	Victoria	NA	NA	0	0	0	0	0	0	0	0	1	0	NA	1
SRR8560246	2	M	MSM	Rectum	Australia	Victoria	No	NA	0	0	0	0	0	0	0	1	NA	0	NA	0
SRR8560247	2	W	MSW/WSM	Cervix	Australia	Victoria	No	No	0	0	0	0	0	0	0	0	0	0	NA	0
SRR8560248	2	M	MSM	Rectum	Australia	Victoria	No	No	0	0	0	0	0	0	0	0	0	0	NA	0
SRR8560249	2	M	MSM	Urethra	Australia	Victoria	No	No	0	0	1	0	0	0	0	1	1	0	NA	0
SRR8560250	2	M	MSM	Rectum	Australia	Victoria	No	No	0	0	0	0	0	0	0	0	0	0	NA	0
SRR8560251	2	M	MSM	Rectum	Australia	Victoria	No	No	0	0	0	0	0	0	0	0	NA	0	NA	0
SRR8560252	2	M	MSM	Urethra	Australia	Victoria	No	Yes	0	0	0	0	0	0	0	0	0	0	NA	0
SRR8560253	2	M	MSM	Urethra	Australia	Victoria	NA	No	0	0	0	0	0	0	0	1	0	0	NA	0
SRR8560254	2	M	MSM	Pharynx	Australia	Victoria	NA	No	0	0	0	0	0	0	0	1	0	0	NA	0
SRR8560255	2	M	MSM	Urethra	Australia	Victoria	No	No	0	0	0	0	0	0	0	0	0	0	NA	0
SRR8560256	2	M	MSM	Pharynx	Australia	Victoria	No	No	0	0	0	0	0	0	0	0	1	0	NA	0
SRR8560257	2	M	NA	Urethra	Australia	Victoria	NA	NA	0	0	0	0	0	0	0	0	0	0	NA	0
SRR8560258	2	M	MSM	Pharynx	Australia	Victoria	No	No	0	0	0	0	0	0	0	0	0	0	NA	0
SRR8560259	2	M	MSM	Pharynx	Australia	Victoria	No	No	0	0	0	0	0	0	0	0	0	0	NA	0
SRR8560260	2	M	NA	Pharynx	Australia	Victoria	NA	NA	0	0	0	0	0	0	0	0	0	0	NA	0
SRR8560261	2	M	NA	NA	Australia	Victoria	NA	No	0	0	0	0	0	0	0	0	0	0	NA	0
SRR8560262	2	W	MSW/WSM	Cervix	Australia	Victoria	No	No	0	0	0	0	0	0	0	1	1	0	NA	0
SRR8560263	2	M	MSW/WSM	Urethra	Australia	Victoria	No	No	0	0	0	0	0	0	0	1	NA	0	NA	0
SRR8560264	2	M	MSM	Urethra	Australia	Victoria	No	No	0	0	0	0	0	0	0	0	1	0	NA	0
SRR8560265	2	M	MSM	Rectum	Australia	Victoria	No	No	0	0	0	0	0	0	0	0	1	0	NA	0
SRR8560266	2	M	MSW/WSM	Urethra	Australia	Victoria	No	No	0	0	0	0	0	0	0	1	NA	0	NA	0
SRR8560267	2	M	MSM	Urethra	Australia	Victoria	No	No	0	0	0	0	0	0	0	0	1	0	NA	0
SRR8560268	2	M	MSM	Rectum	Australia	Victoria	NA	No	0	0	0	0	0	0	0	0	1	0	NA	0
SRR8560269	2	W	MSW/WSM	Cervix	Australia	Victoria	NA	NA	0	1	0	0	0	0	0	0	NA	0	NA	1
SRR8560270	2	M	MSM	Pharynx	Australia	Victoria	No	No	0	0	0	0	0	0	0	0	0	0	NA	0
SRR8560271	2	M	NA	Urethra	Australia	Victoria	NA	NA	0	0	0	0	0	0	0	0	0	0	NA	0
SRR8560272	2	M	MSM	Urethra	Australia	Victoria	No	No	0	0	0	0	0	0	0	1	1	0	NA	0
SRR8560273	2	M	MSM	Pharynx	Australia	Victoria	No	No	0	0	1	0	0	0	0	1	0	0	NA	0
SRR8560274	2	W	MSW/WSM	Cervix	Australia	Victoria	Yes	No	1	0	0	0	0	0	0	1	1	0	NA	0
SRR8560275	2	M	MSW/WSM	Urethra	Australia	Victoria	Yes	No	0	0	0	0	0	0	0	0	0	0	NA	0
SRR8560276	2	M	MSM	Urethra	Australia	Victoria	No	No	0	0	0	0	0	0	0	0	0	0	NA	0
SRR8560277	2	M	MSW/WSM	Rectum	Australia	Victoria	No	No	0	0	0	0	0	0	0	0	0	0	NA	0
SRR8560278	2	M	NA	Urethra	Australia	Victoria	NA	NA	0	0	0	0	0	0	0	1	1	0	NA	0
SRR8560279	2	M	MSM	Urethra	Australia	Victoria	No	No	0	0	0	0	0	0	0	0	1	0	NA	0
SRR8560280	2	M	MSM	Rectum	Australia	Victoria	No	No	0	0	0	0	0	0	0	1	0	0	NA	0
SRR8560281	2	M	NA	Urethra	Australia	Victoria	NA	NA	0	0	0	0	0	0	0	0	1	0	NA	0
SRR8560282	2	M	NA	Urethra	Australia	Victoria	NA	NA	0	0	0	0	0	0	0	0	1	0	NA	0
SRR8560283	2	M	MSM	Urethra	Australia	Victoria	No	No	0	0	0	0	0	0	0	0	0	0	NA	0
SRR8560284	2	M	MSM	Rectum	Australia	Victoria	No	No	0	0	0	0	0	0	0	0	0	0	NA	0
SRR8560285	2	M	MSW/WSM	Pharynx	Australia	Victoria	Yes	No	0	0	0	0	0	0	0	1	NA	0	NA	0
SRR8560286	2	M	NA	Rectum	Australia	Victoria	NA	NA	0	0	0	0	0	0	0	0	0	0	NA	0
SRR8560287	2	M	MSW/WSM	Urethra	Australia	Victoria	No	No	0	0	0	0	0	0	0	0	1	0	NA	0
SRR8560288	2	M	MSW/WSM	Urethra	Australia	Victoria	No	No	0	0	0	0	0	0	0	1	1	0	NA	0
SRR8560289	2	M	MSM	Pharynx	Australia	Victoria	No	No	0	0	0	0	0	0	0	0	0	0	NA	0
SRR8560290	2	M	MSM	Rectum	Australia	Victoria	No	NA	0	0	0	0	0	0	0	0	0	0	NA	0
SRR8560291	2	M	MSM	NA	Australia	Victoria	No	NA	0	1	0	0	0	0	0	1	0	0	NA	1
SRR8560292	2	M	MSM	Pharynx	Australia	Victoria	No	No	0	0	0	0	0	0	0	0	0	0	NA	0
SRR8560293	2	M	MSM	Urethra	Australia	Victoria	No	No	0	0	0	0	0	0	0	0	0	0	NA	0
SRR8560294	2	M	MSM	Pharynx	Australia	Victoria	No	No	0	0	0	0	0	0	0	0	1	0	NA	0
SRR8560295	2	M	MSM	Rectum	Australia	Victoria	NA	No	0	0	0	0	0	0	0	0	1	0	NA	0
SRR8560296	2	M	MSM	Rectum	Australia	Victoria	No	Yes	0	0	0	0	0	0	0	0	1	0	NA	0
SRR8560297	2	M	MSM	Rectum	Australia	Victoria	No	NA	0	0	0	0	0	0	0	0	1	0	NA	0
SRR8560298	2	M	MSM	Urethra	Australia	Victoria	No	No	0	0	0	0	0	0	0	0	0	0	NA	0
SRR8560299	2	W	MSW/WSM	Pharynx	Australia	Victoria	No	No	0	0	0	0	0	0	0	0	0	0	NA	0
SRR8560300	2	M	MSM	Pharynx	Australia	Victoria	No	No	0	0	0	0	0	0	0	0	0	0	NA	0
SRR8560301	2	M	MSW/WSM	Urethra	Australia	Victoria	No	No	0	0	0	0	0	0	0	0	1	0	NA	0
SRR8560302	2	M	MSM	Urethra	Australia	Victoria	No	No	0	0	0	0	0	0	0	0	0	0	NA	0
SRR8560303	2	M	MSM	Pharynx	Australia	Victoria	No	No	0	0	0	0	0	0	0	0	0	0	NA	0
SRR8560304	2	M	MSM	Pharynx	Australia	Victoria	No	No	0	1	0	0	0	0	0	0	0	0	NA	1
SRR8560305	2	M	MSM	Rectum	Australia	Victoria	No	NA	0	0	0	0	0	0	0	0	0	0	NA	0
SRR8560306	2	M	MSM	Rectum	Australia	Victoria	No	No	0	0	0	0	0	0	0	0	1	0	NA	0
SRR8560307	2	M	MSM	Urethra	Australia	Victoria	No	No	0	0	0	0	0	0	0	0	0	0	NA	0
SRR8560308	2	M	MSW/WSM	Urethra	Australia	Victoria	No	No	0	0	0	0	0	0	0	0	0	0	NA	0
SRR8560309	2	M	MSM	Urethra	Australia	Victoria	No	No	0	0	0	0	0	0	0	0	0	0	NA	0
SRR8560310	2	M	MSM	Pharynx	Australia	Victoria	No	No	0	0	0	0	0	0	0	0	1	0	NA	0
SRR8560311	2	M	MSW/WSM	Urethra	Australia	Victoria	No	No	0	1	0	0	0	0	0	0	0	0	NA	0
SRR8560312	2	M	MSM	Urethra	Australia	Victoria	No	No	0	0	0	0	0	0	0	0	0	0	NA	0
SRR8560313	2	M	MSM	Pharynx	Australia	Victoria	NA	No	0	0	0	0	0	0	0	1	NA	0	NA	0
[truncated: 2,780 more rows]
